# Supplementary material
Source: PubMed Central journal article supplement (PMC4769034)

# Supporting Information

## Structure-Activity Relationship Studies of Substituted 2-(Isoxazol-3-yl)-2-Oxo-*N'*-Phenyl-Acetohydrazonoyl Cyanide Analogues: Identification of Potent Exchange Proteins Directly Activated by cAMP (EPAC) Antagonists

Na Ye,<sup>†,‡</sup> Yingmin Zhu,<sup>‡,‡</sup> Haijun Chen,<sup>†</sup> Zhiqing Liu,<sup>†</sup> Fang C. Mei,<sup>‡</sup> Christopher Wild,<sup>†</sup>  
Haiying Chen,<sup>†</sup> Xiaodong Cheng,<sup>‡,\*</sup> and Jia Zhou<sup>†,\*</sup>

<sup>†</sup>Chemical Biology Program, Department of Pharmacology and Toxicology, University of Texas  
Medical Branch, Galveston, Texas 77555, United States

<sup>‡</sup>Department of Integrative Biology and Pharmacology, Texas Therapeutics Institute, The Brown  
Foundation Institute of Molecular Medicine, The University of Texas Health Science Center,  
Houston, Texas 77030, United States

### Table of Contents

Copies of <sup>1</sup>H and <sup>13</sup>C NMR spectra page 2-45

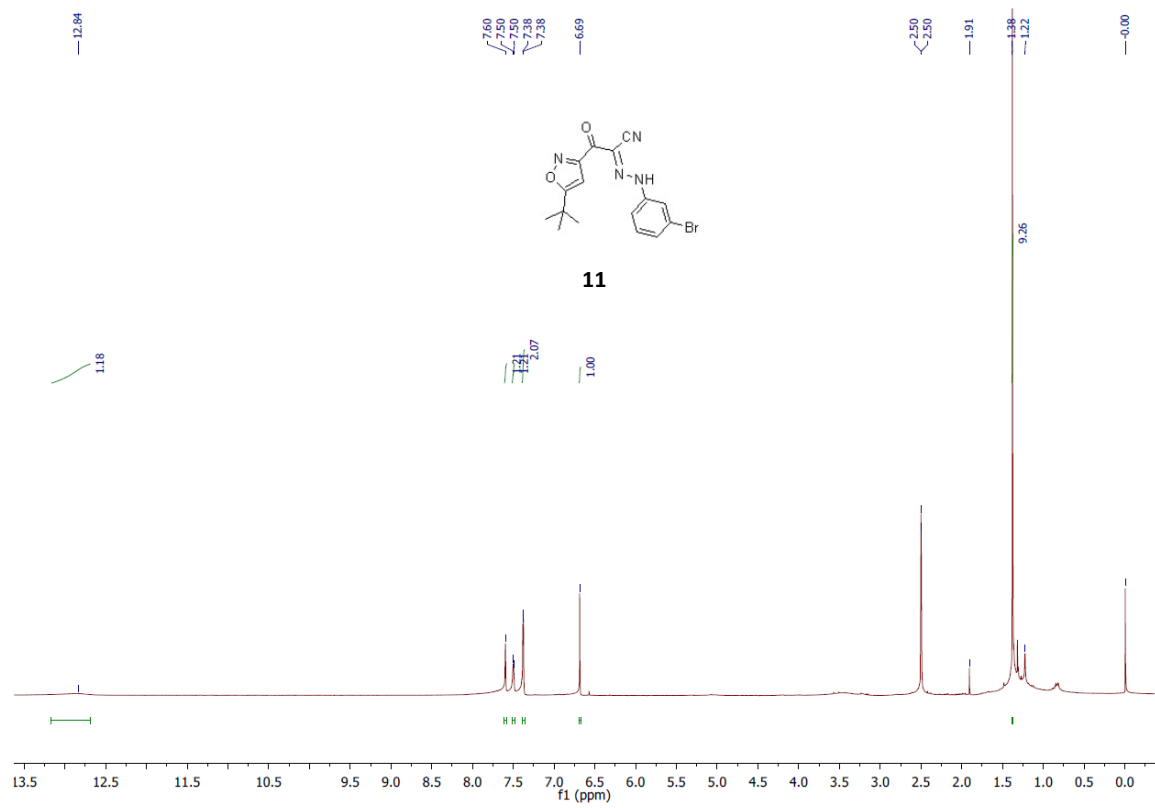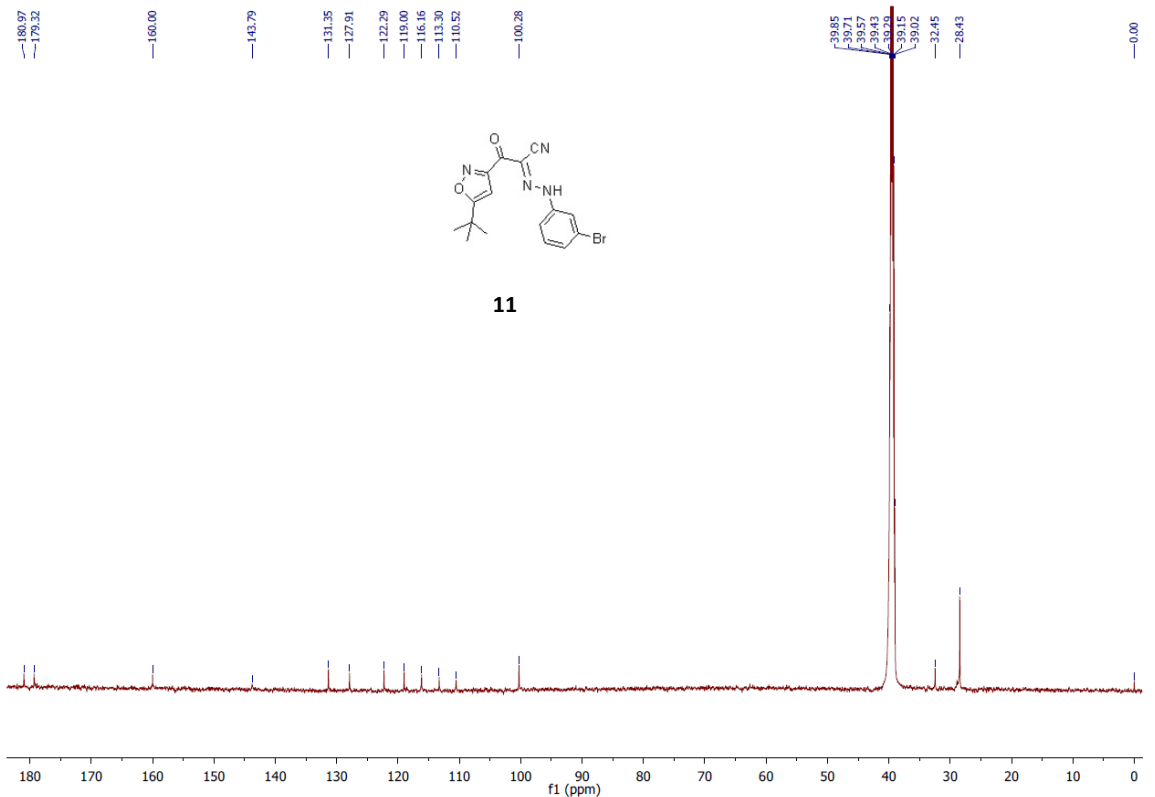

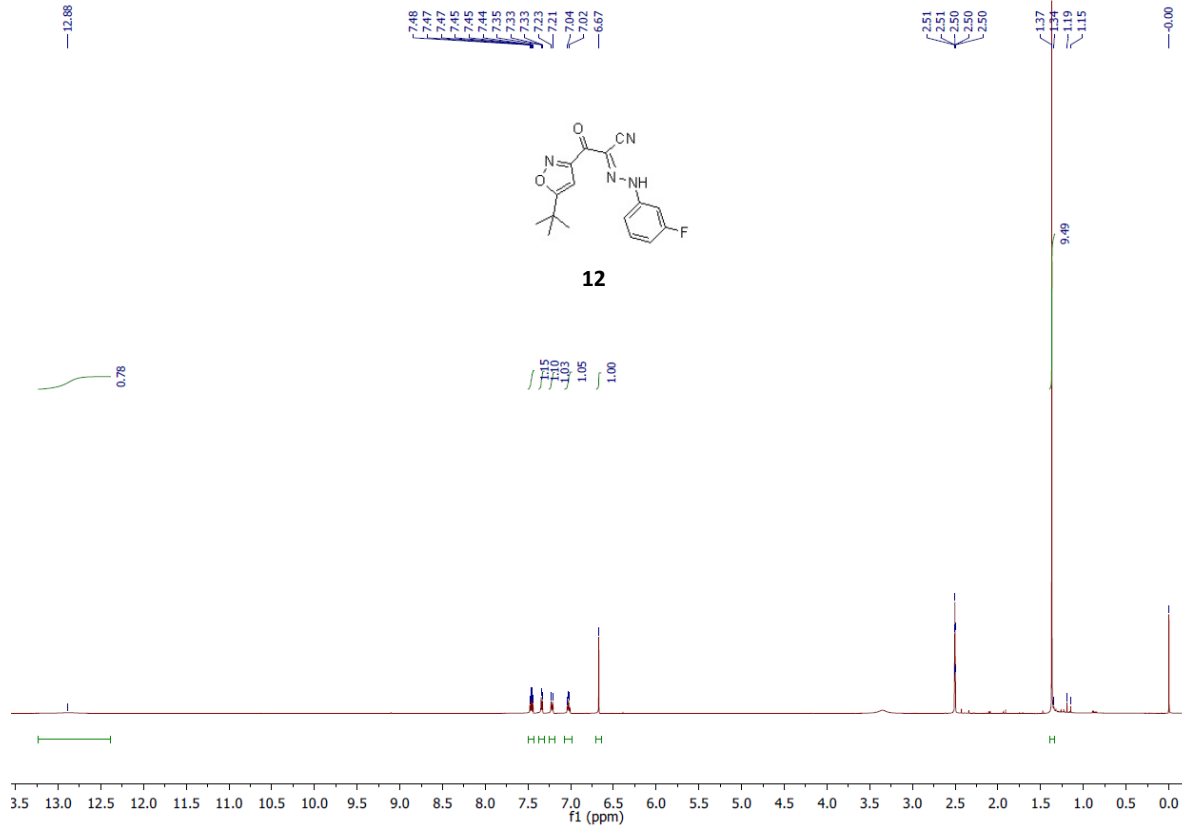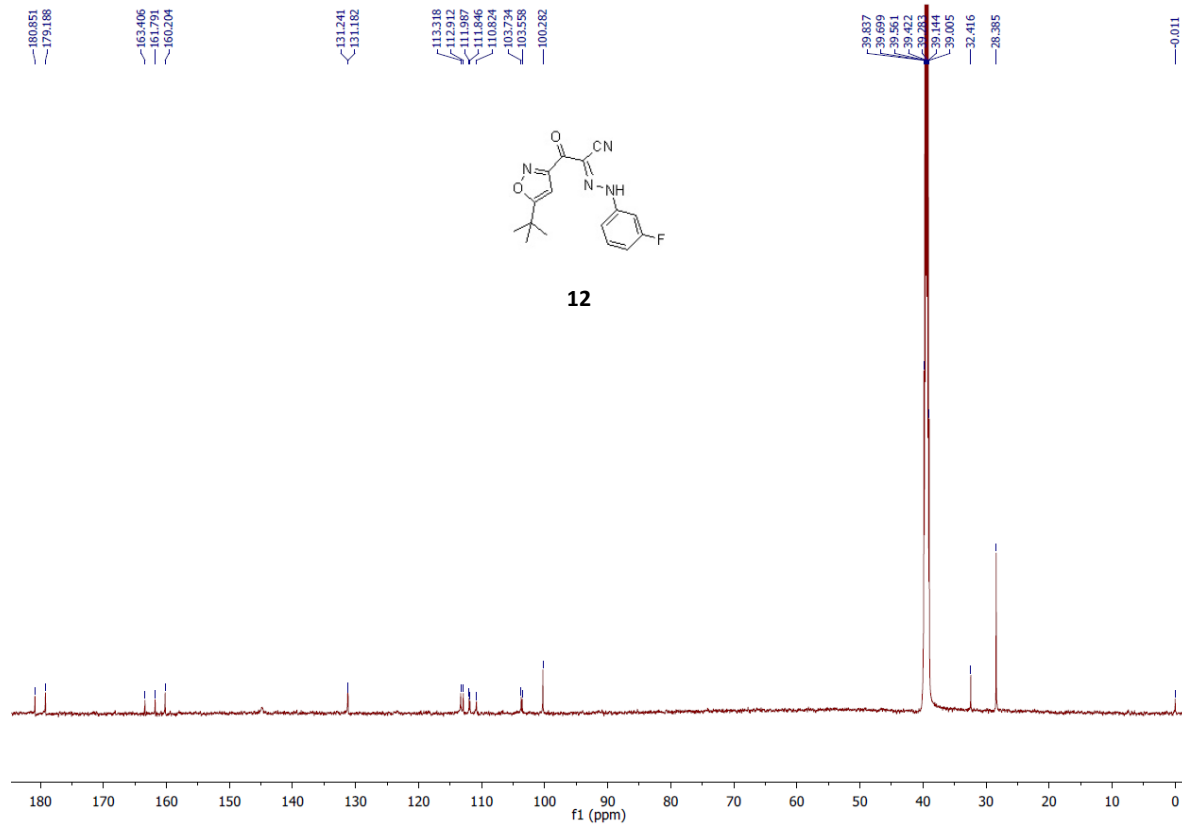

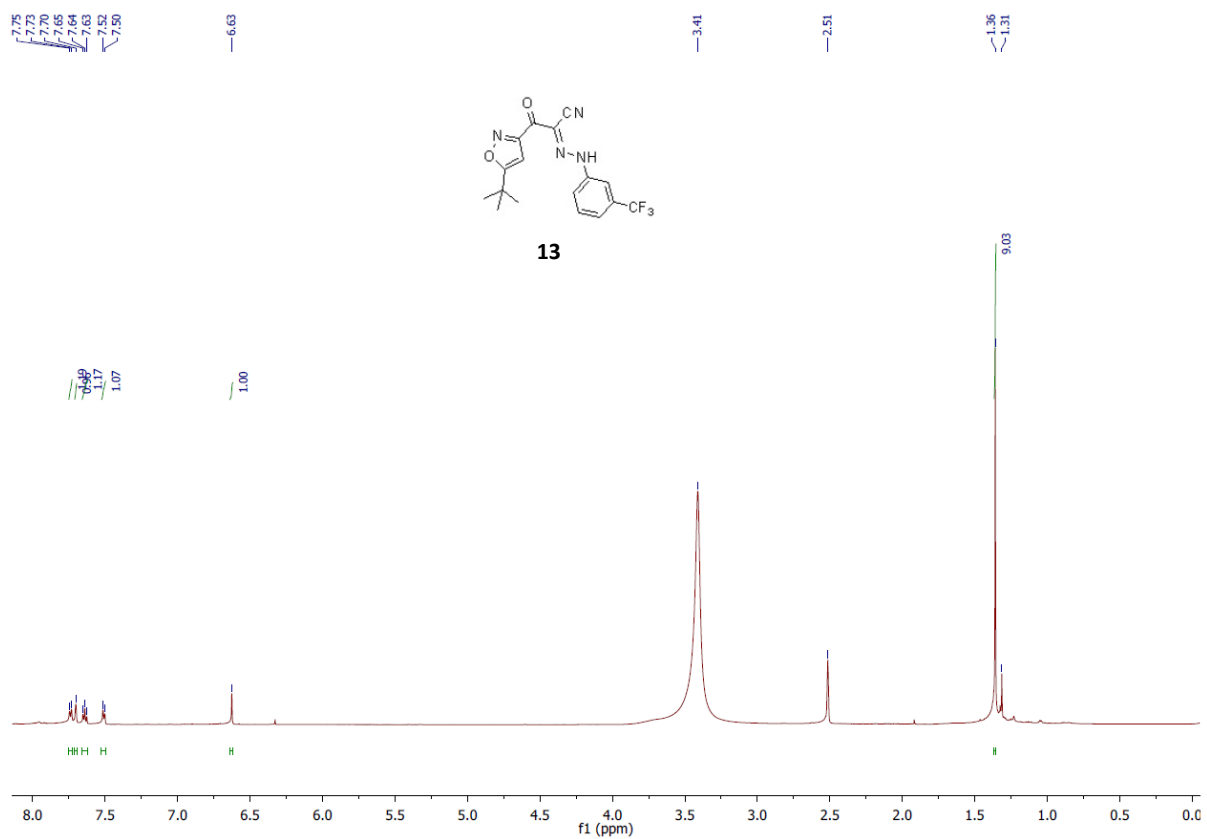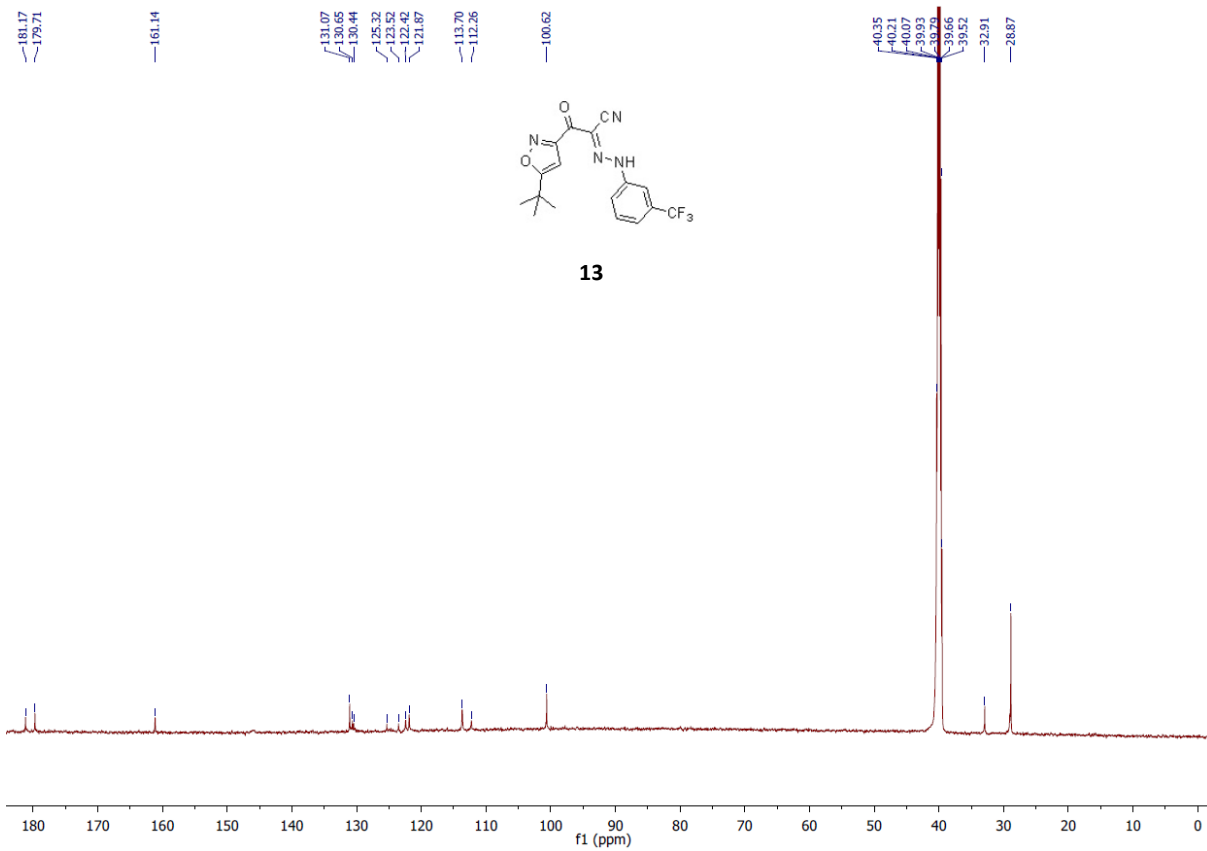

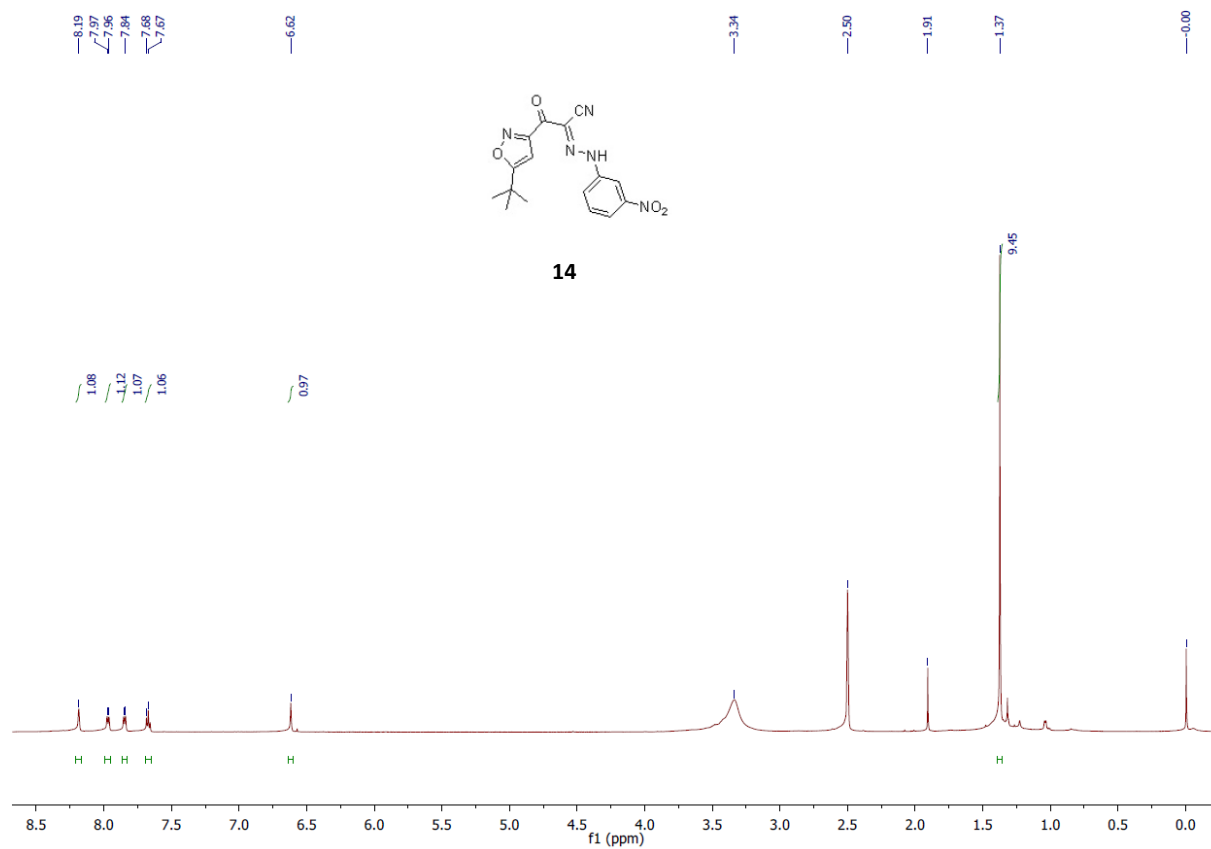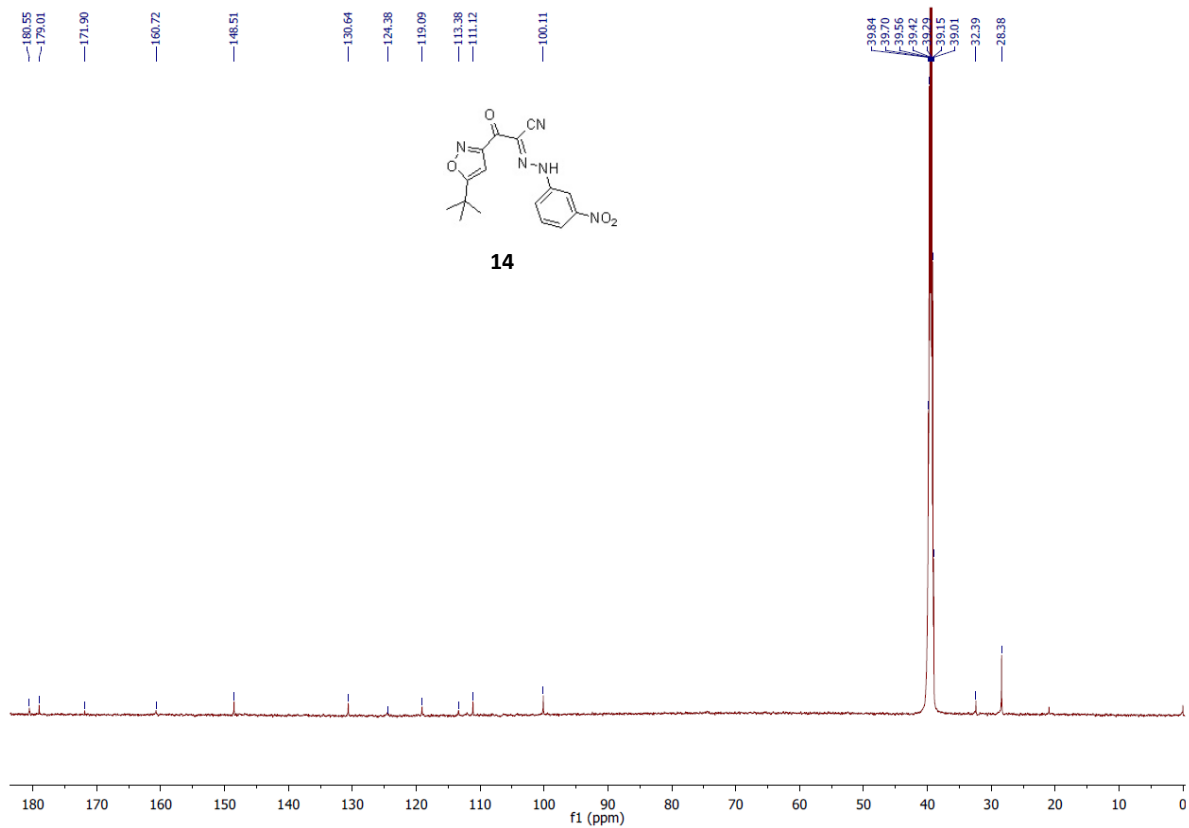

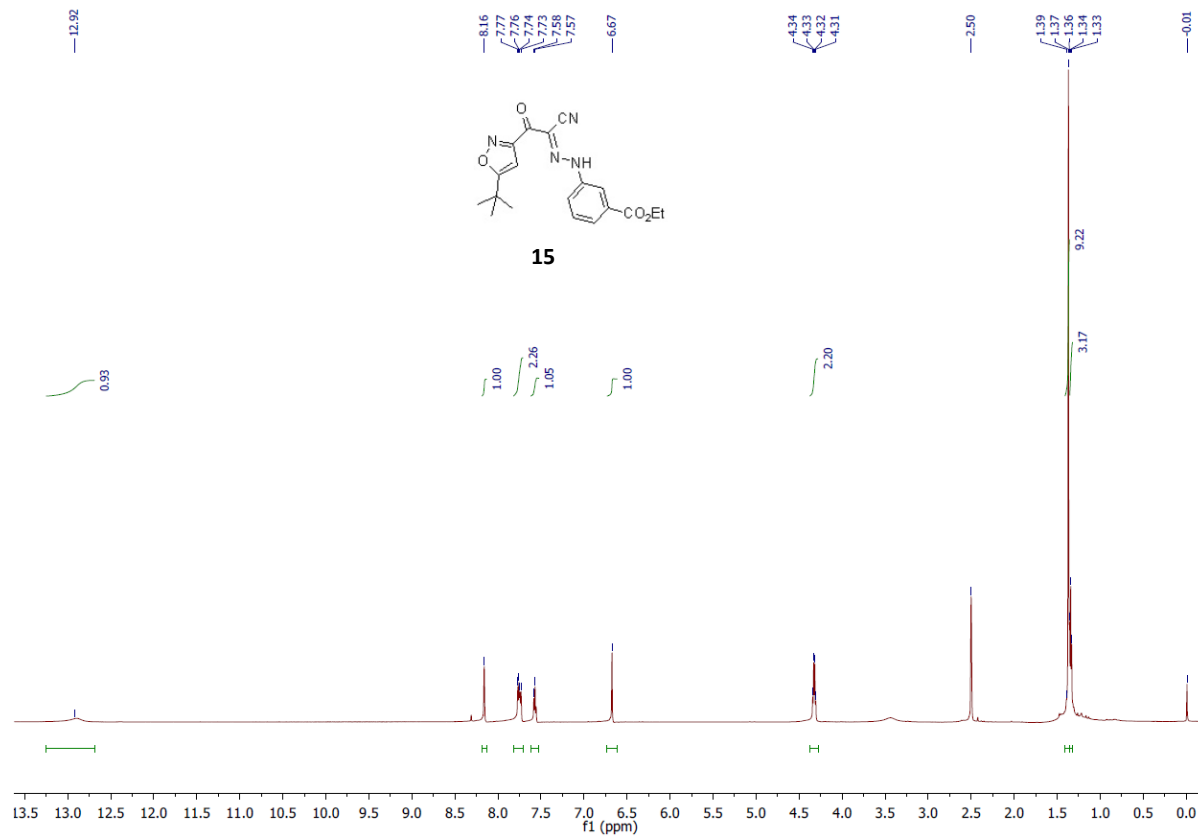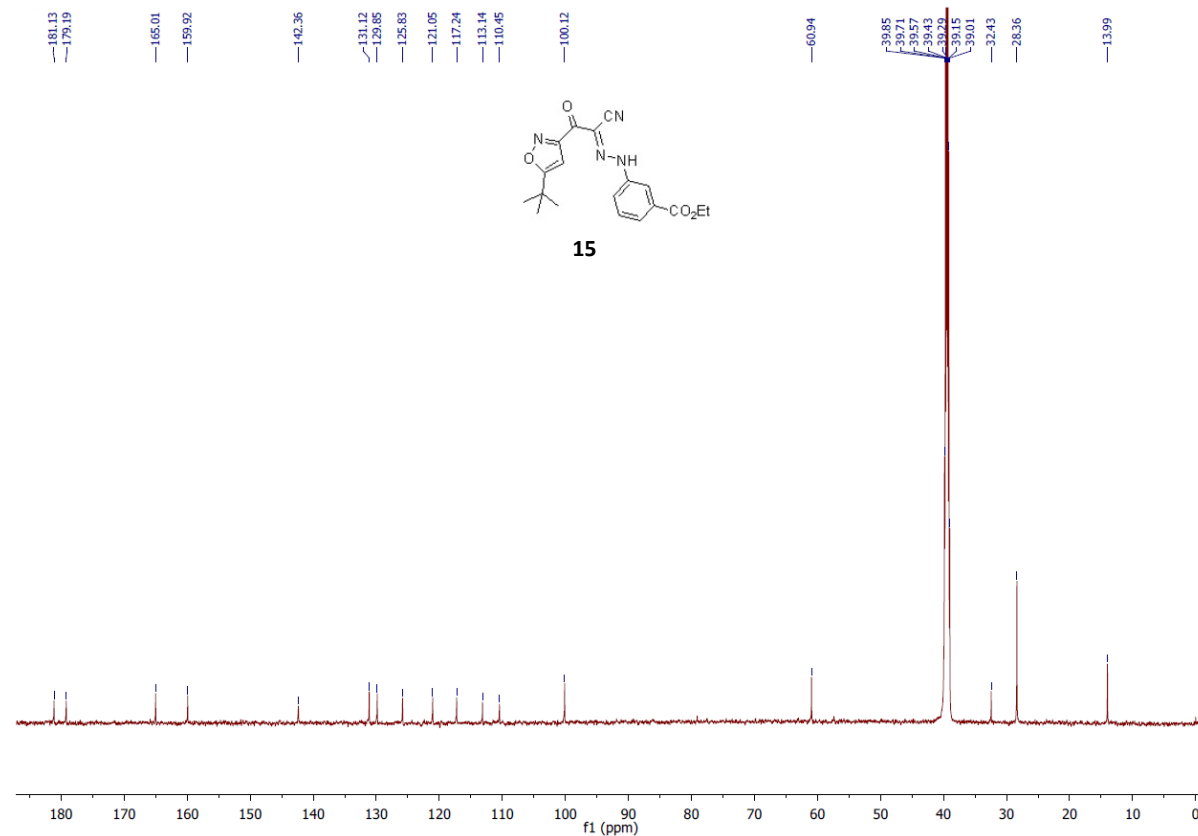

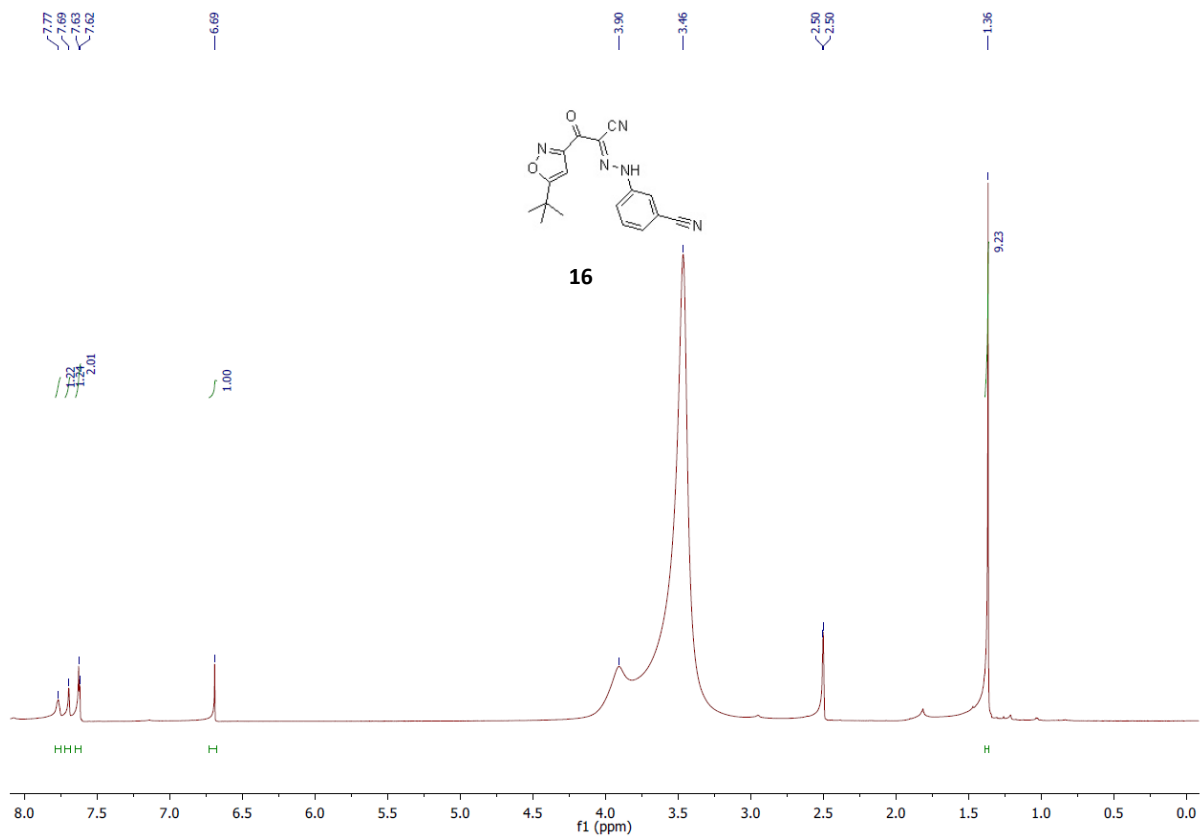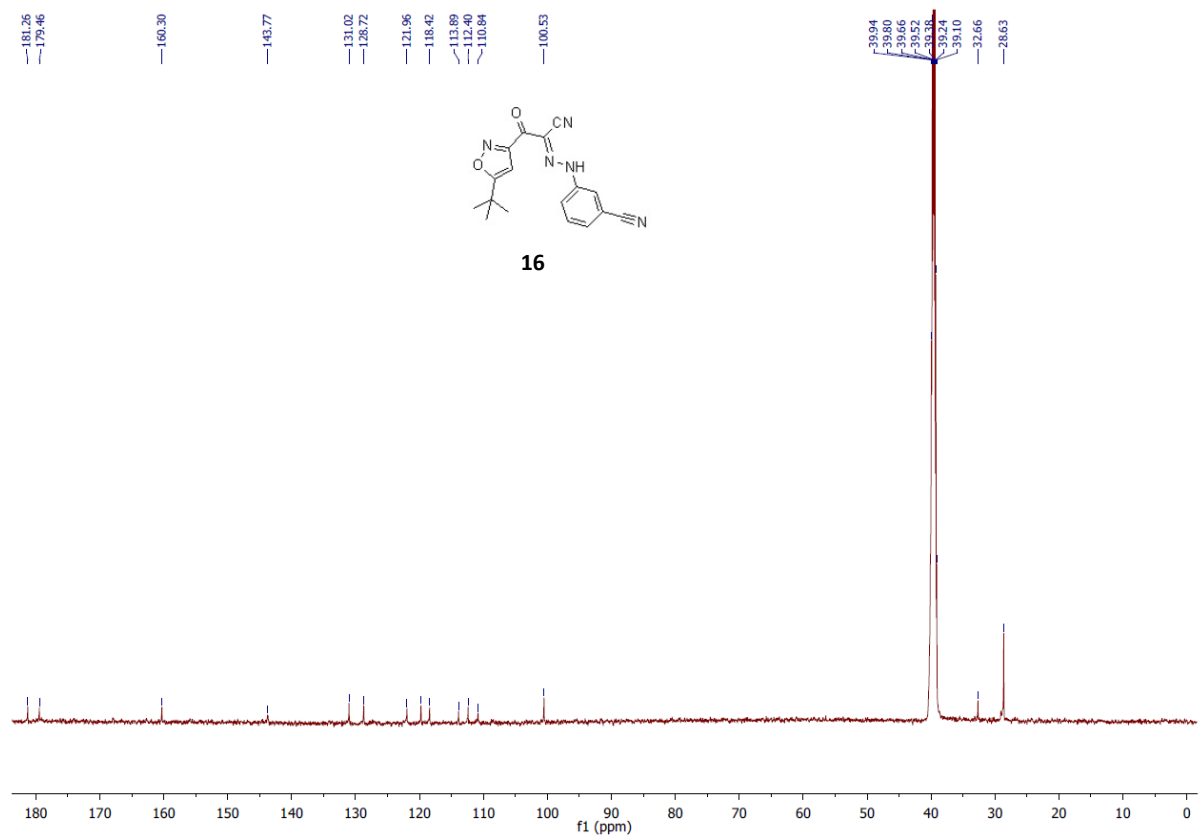

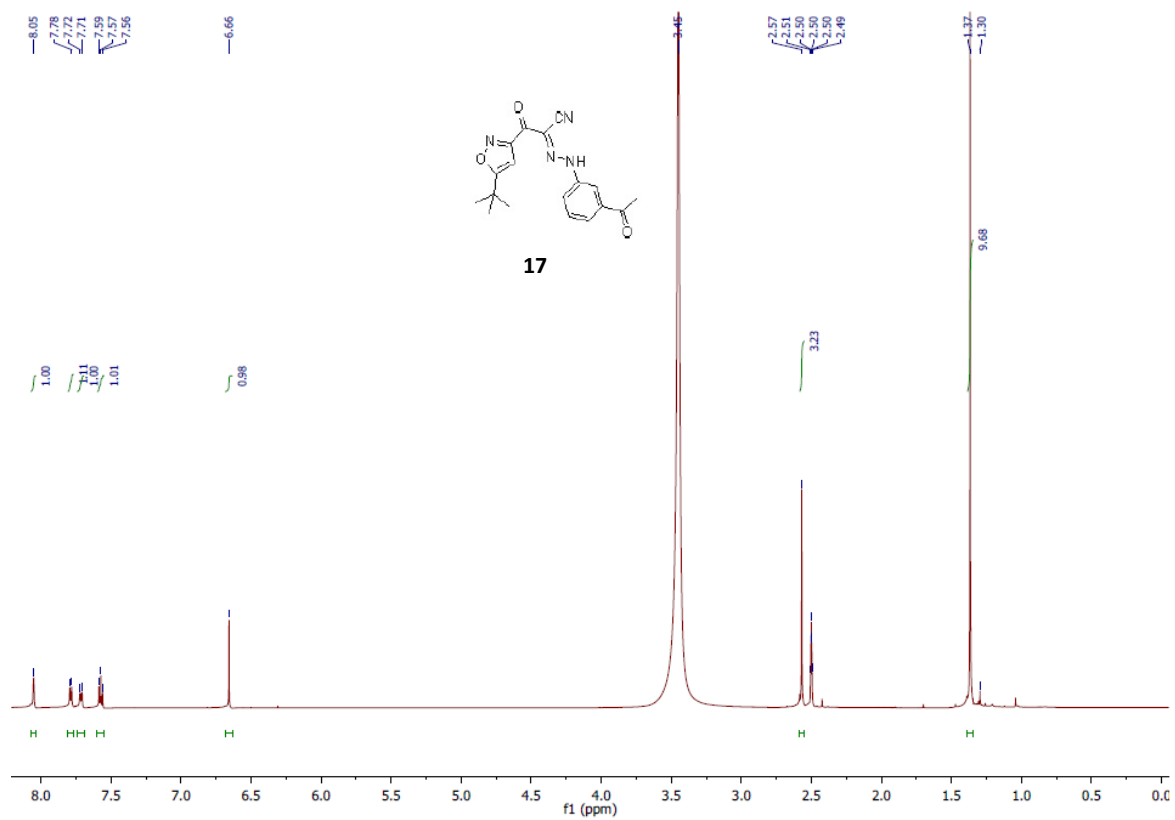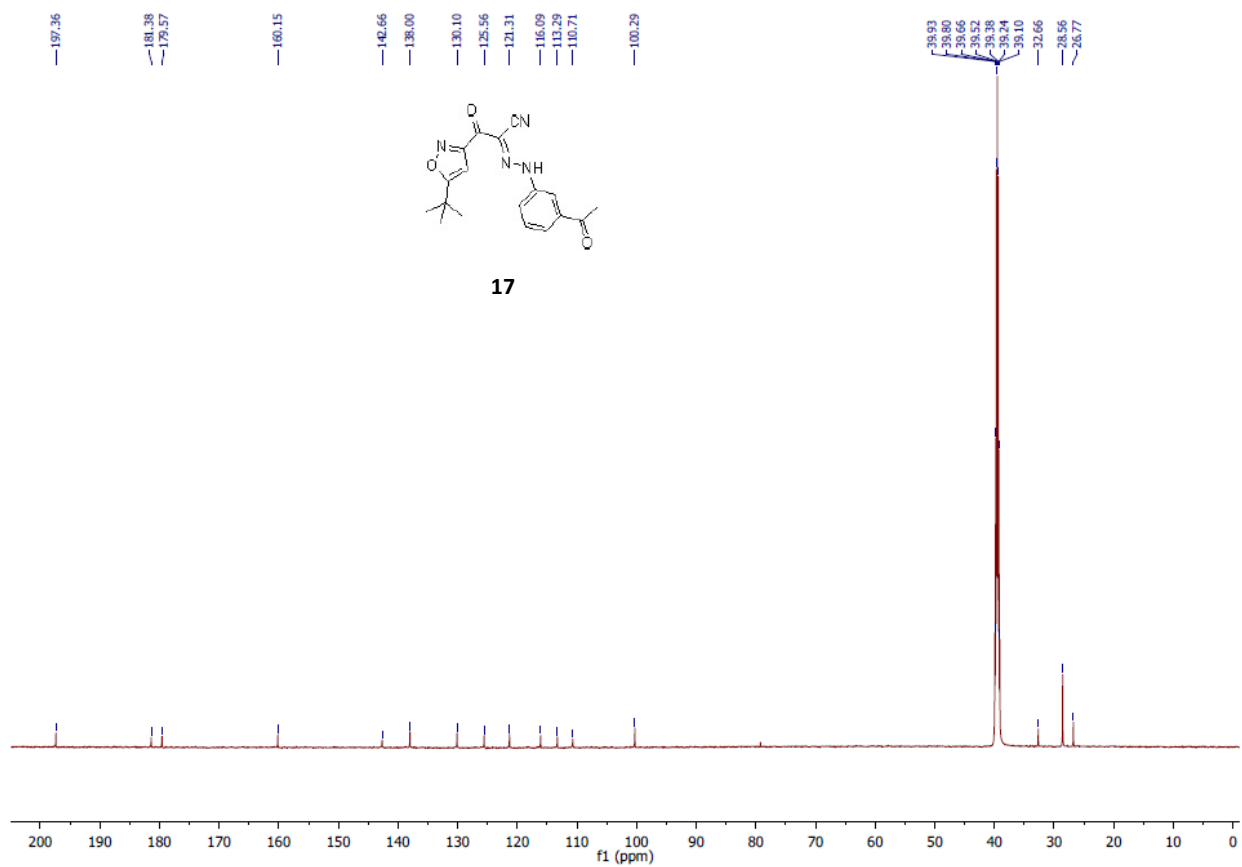



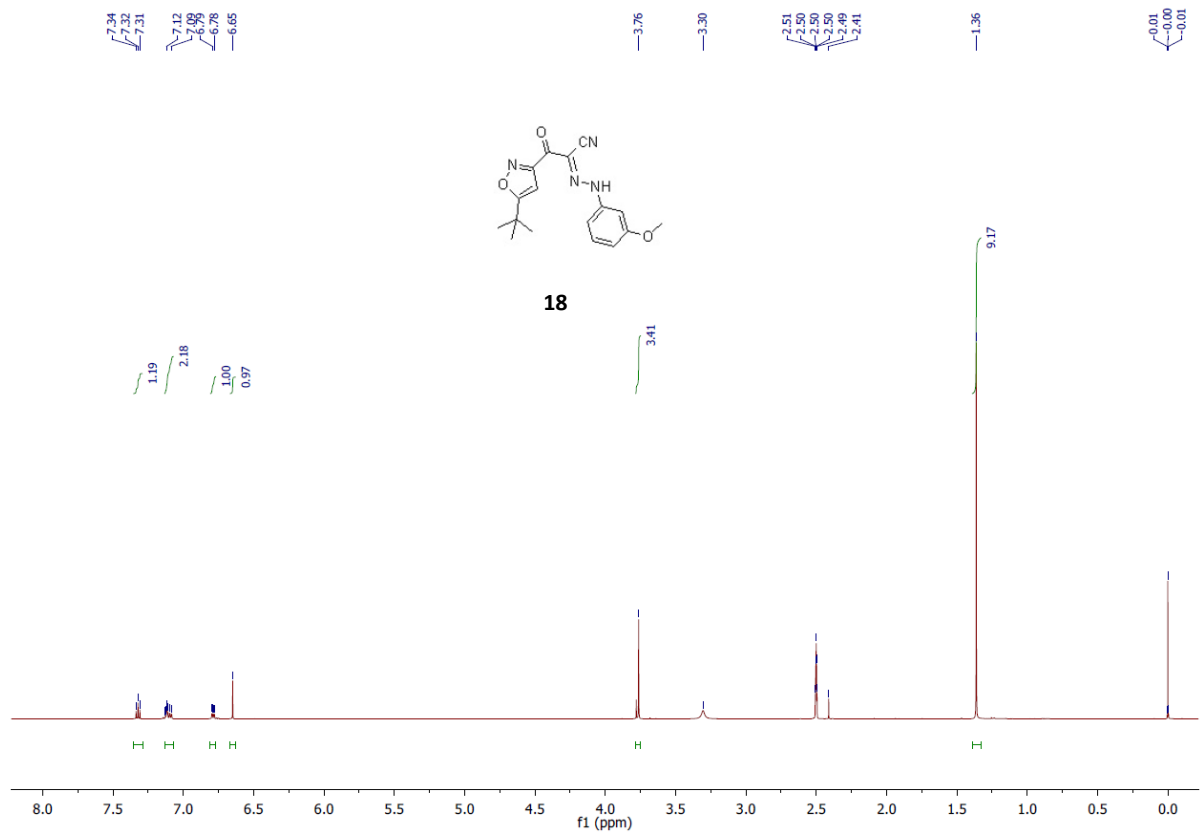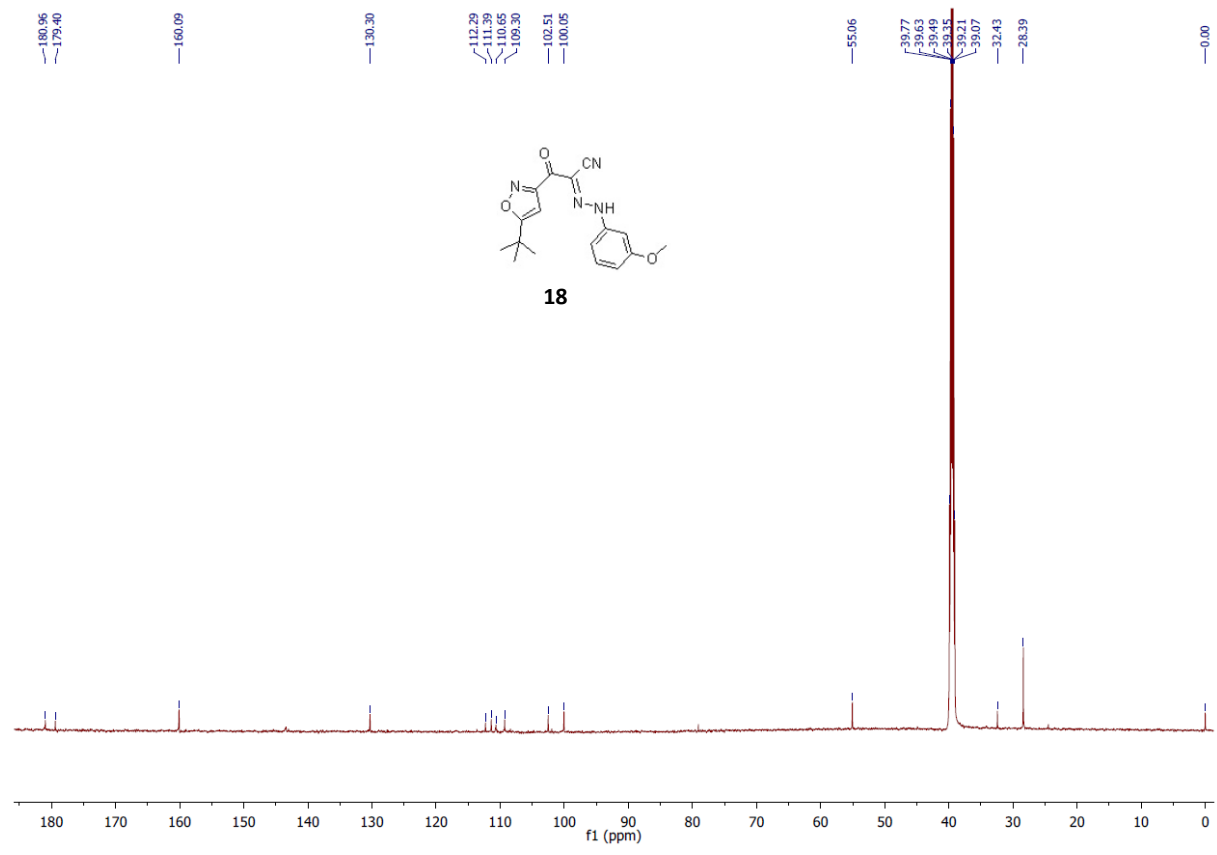

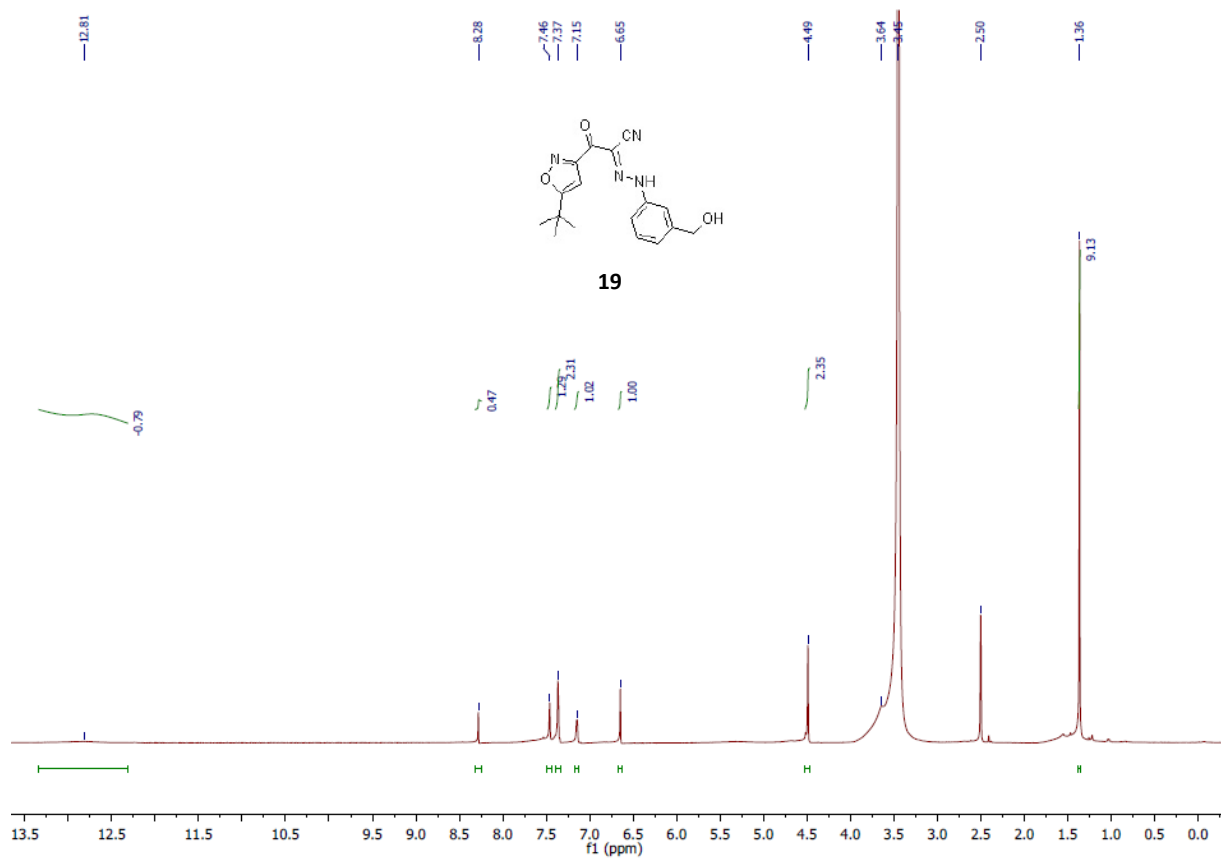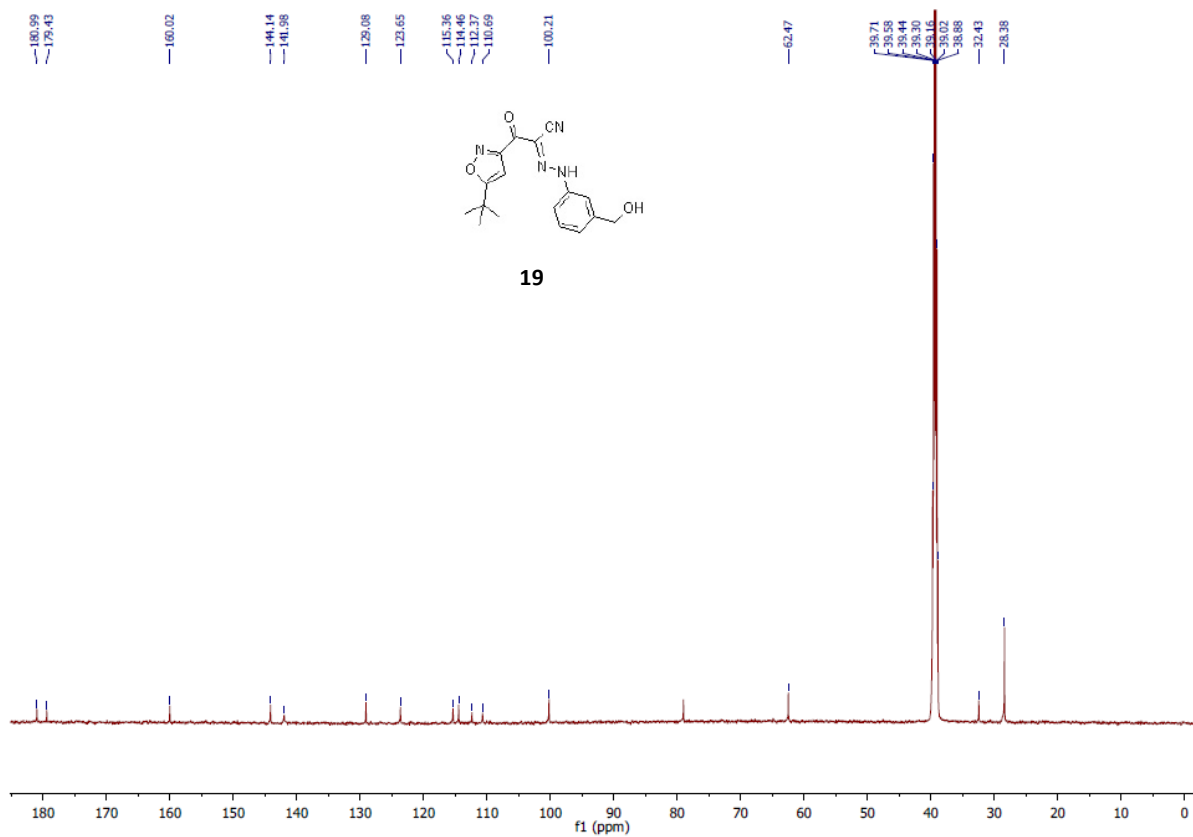

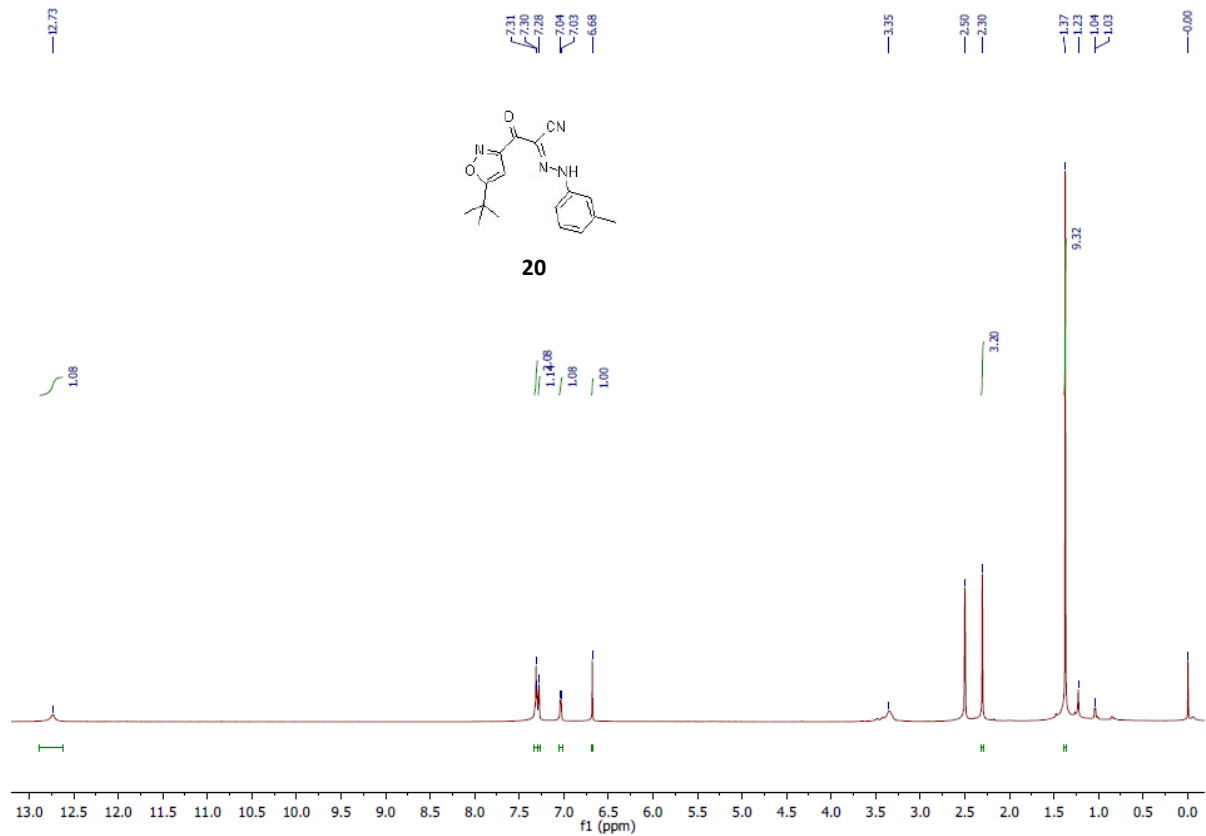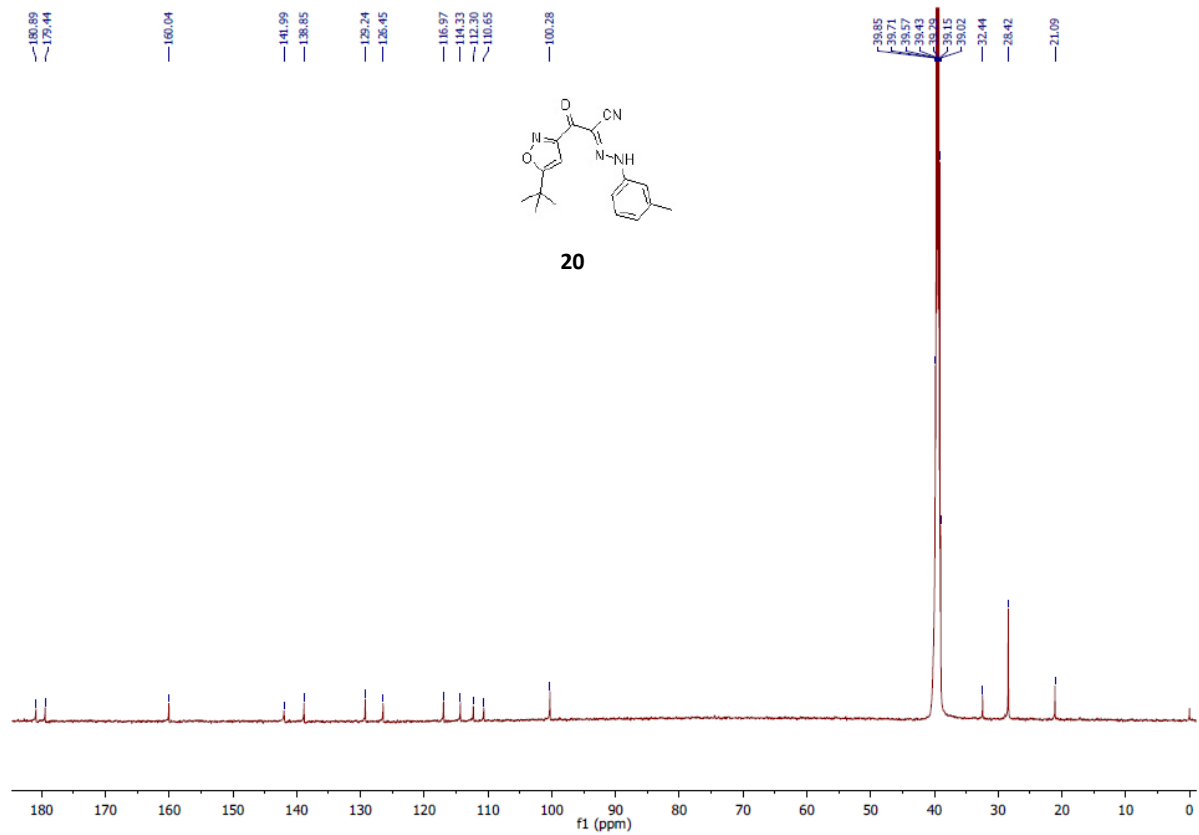

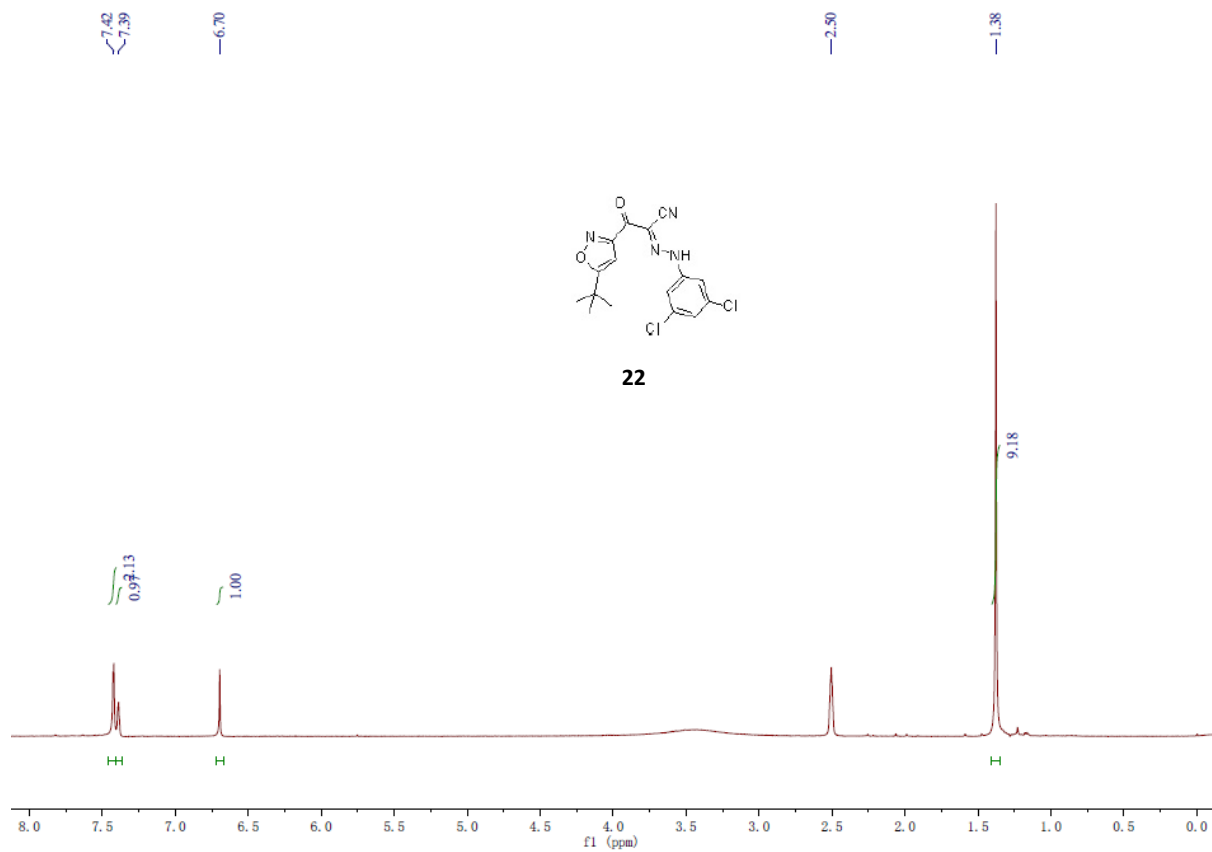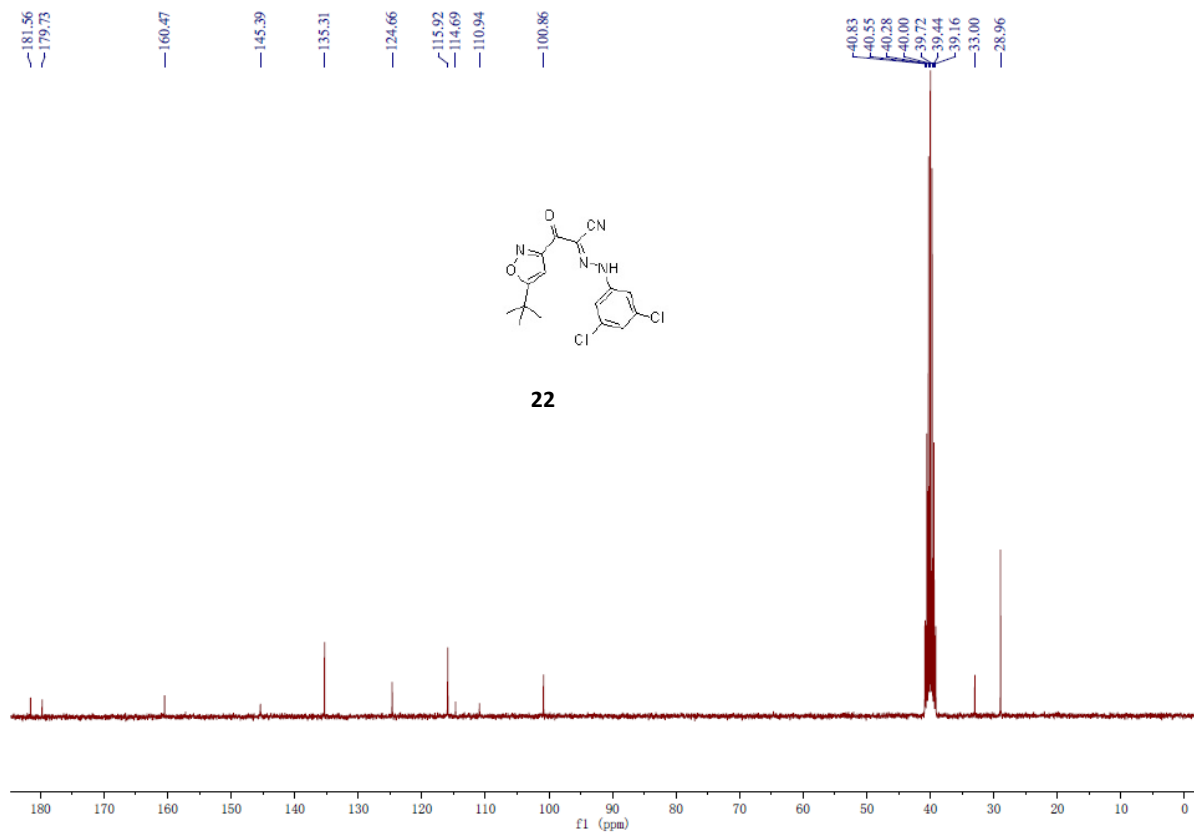

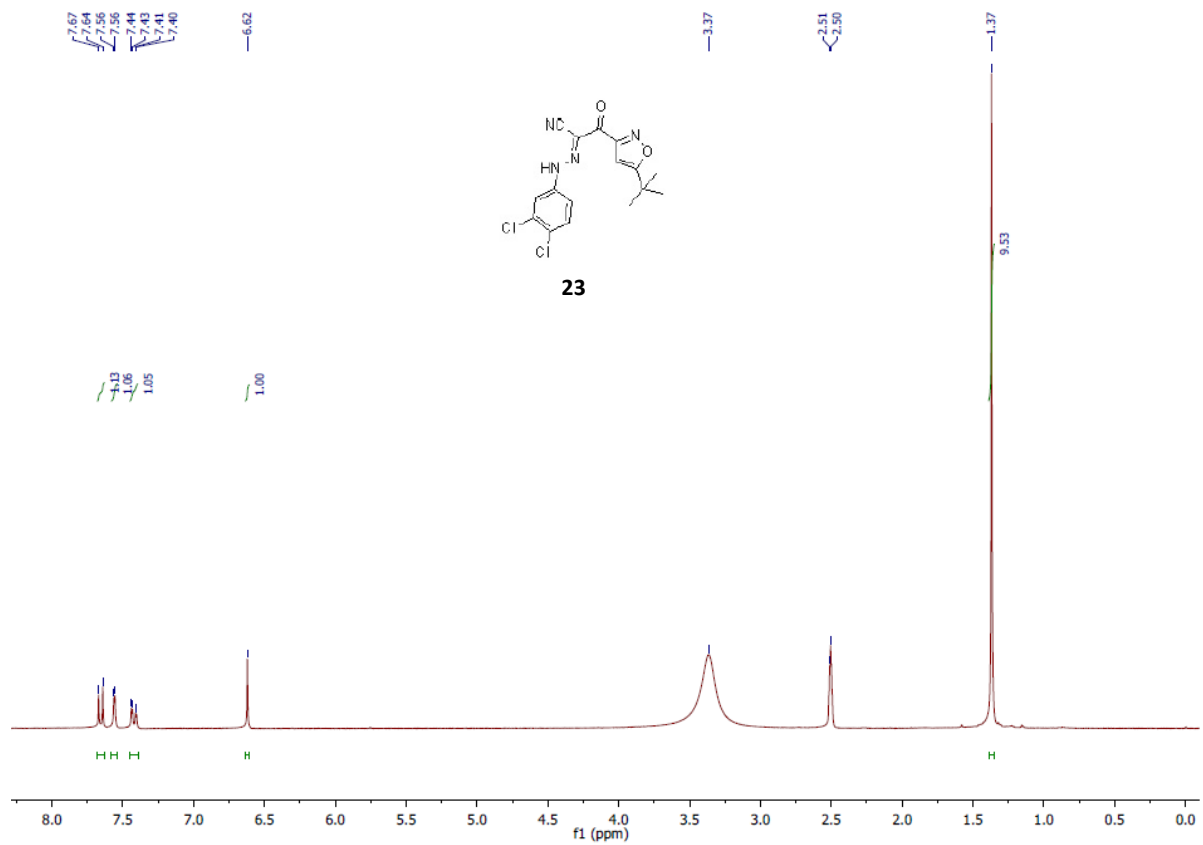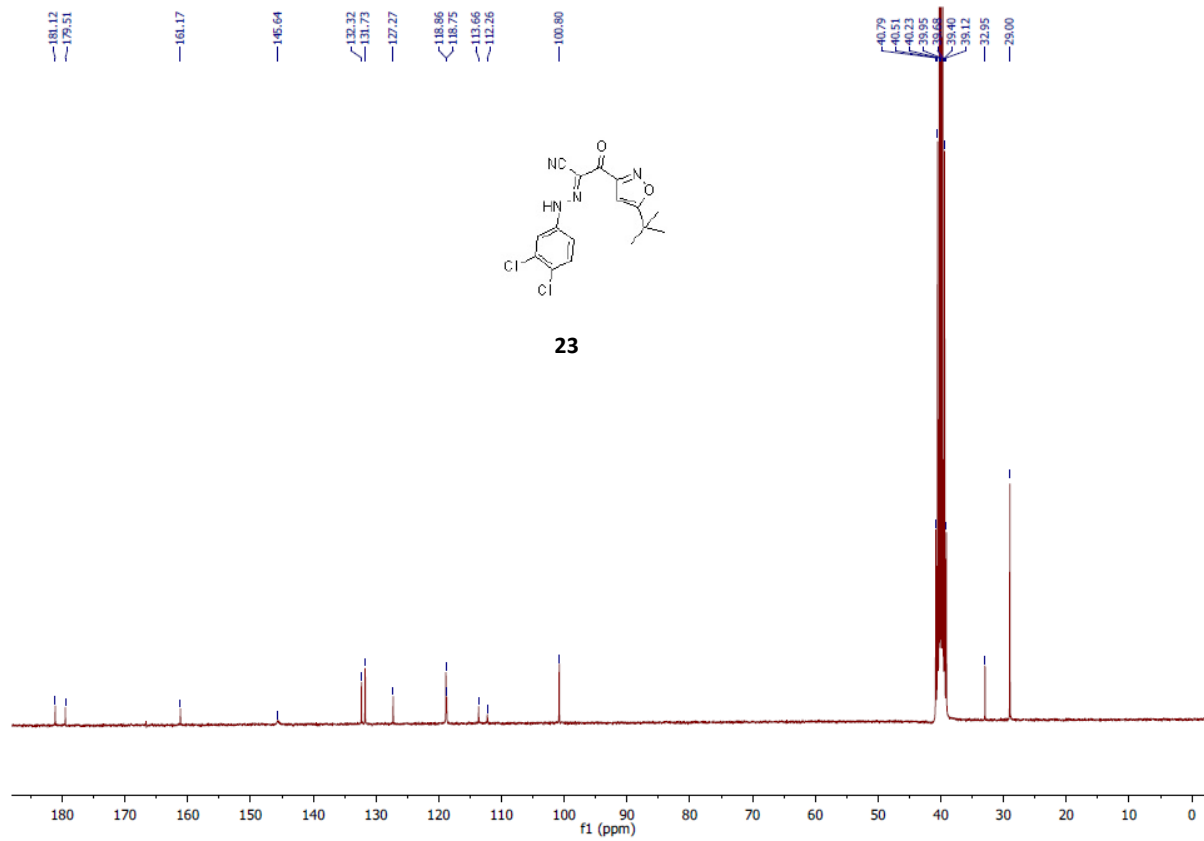

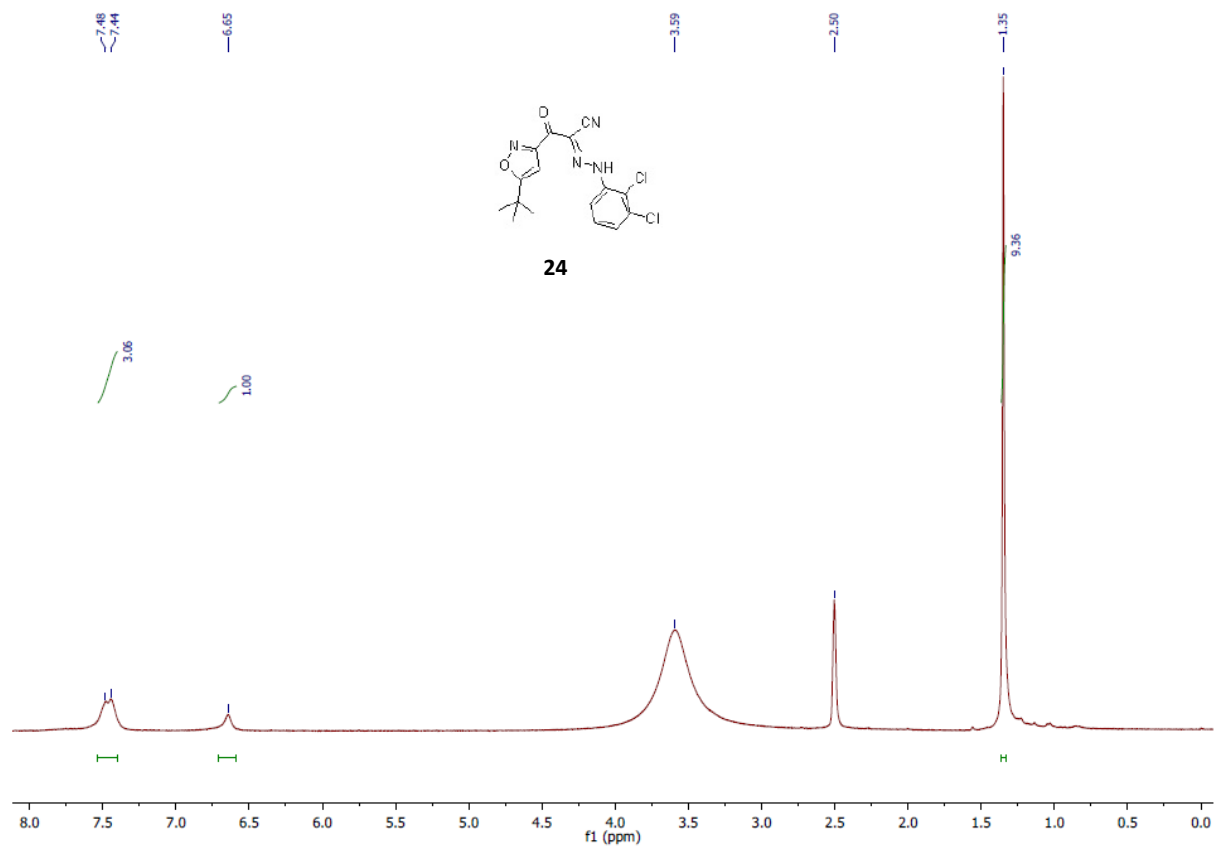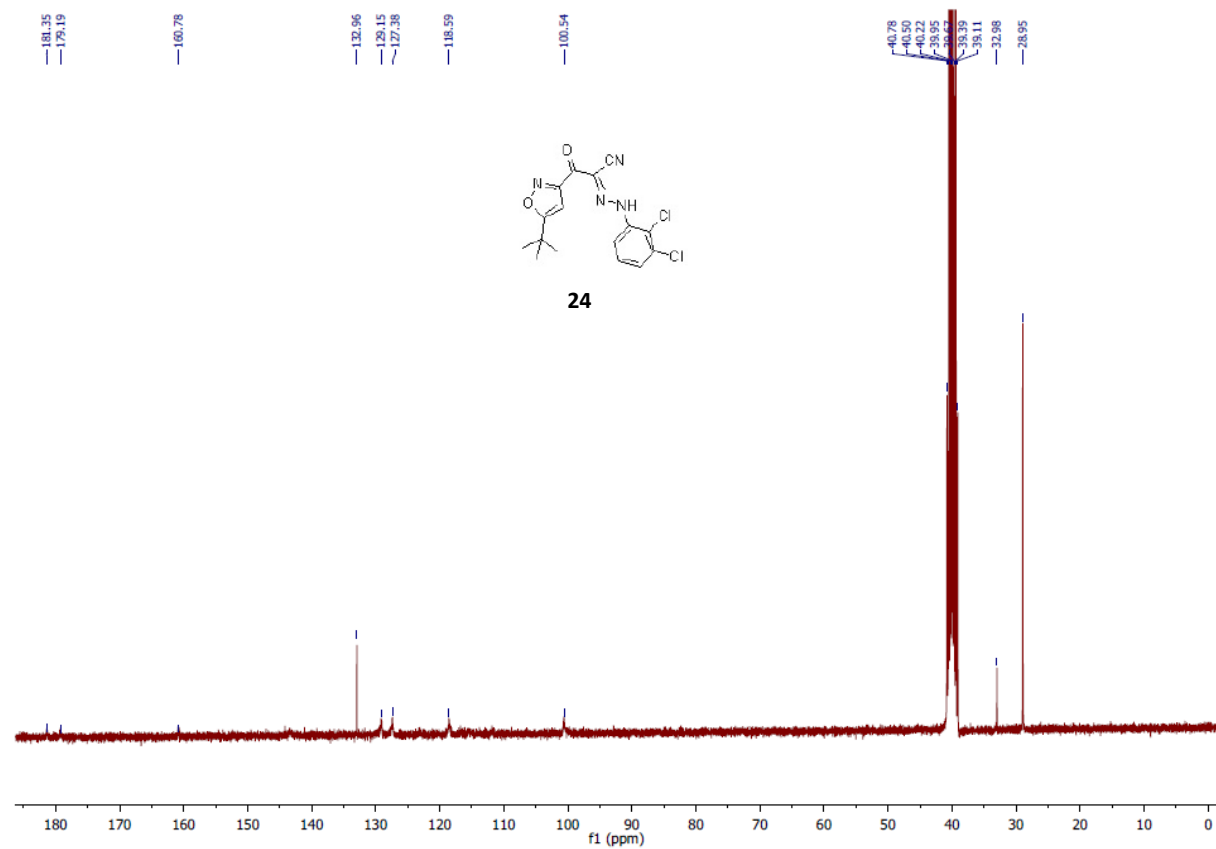

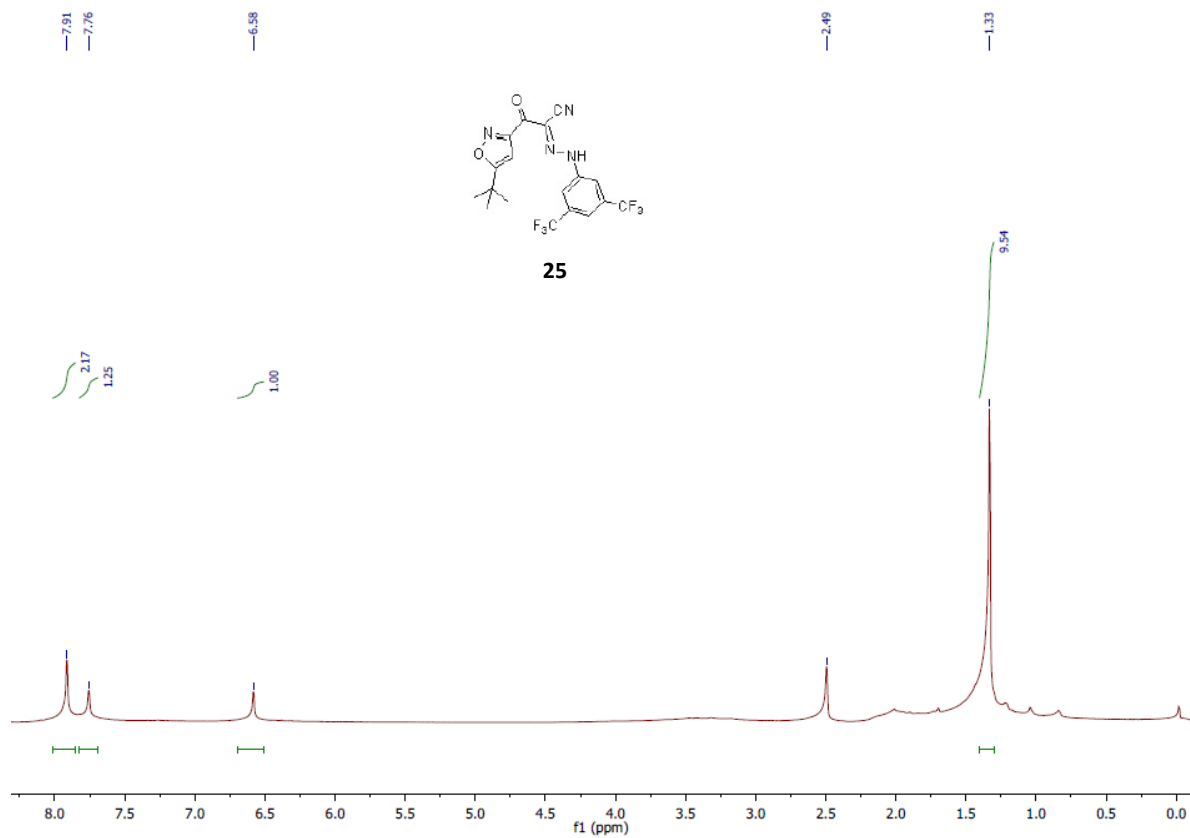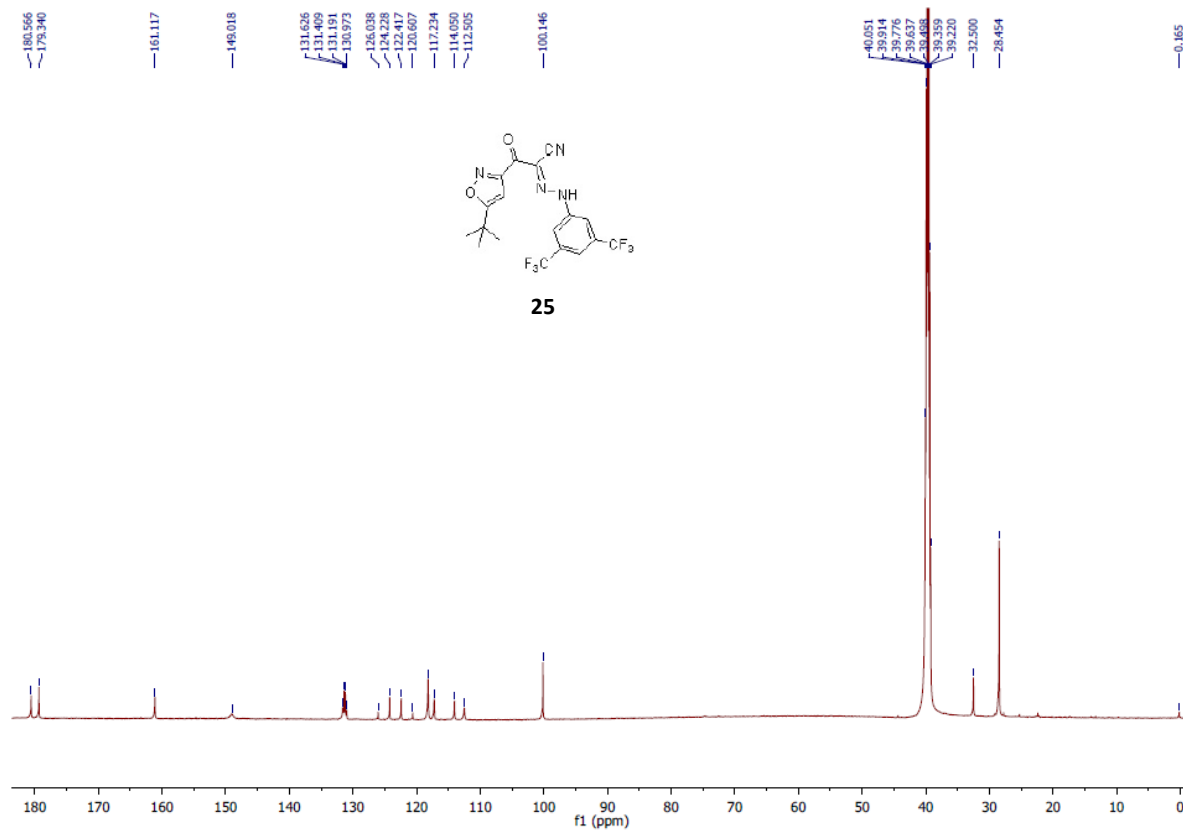

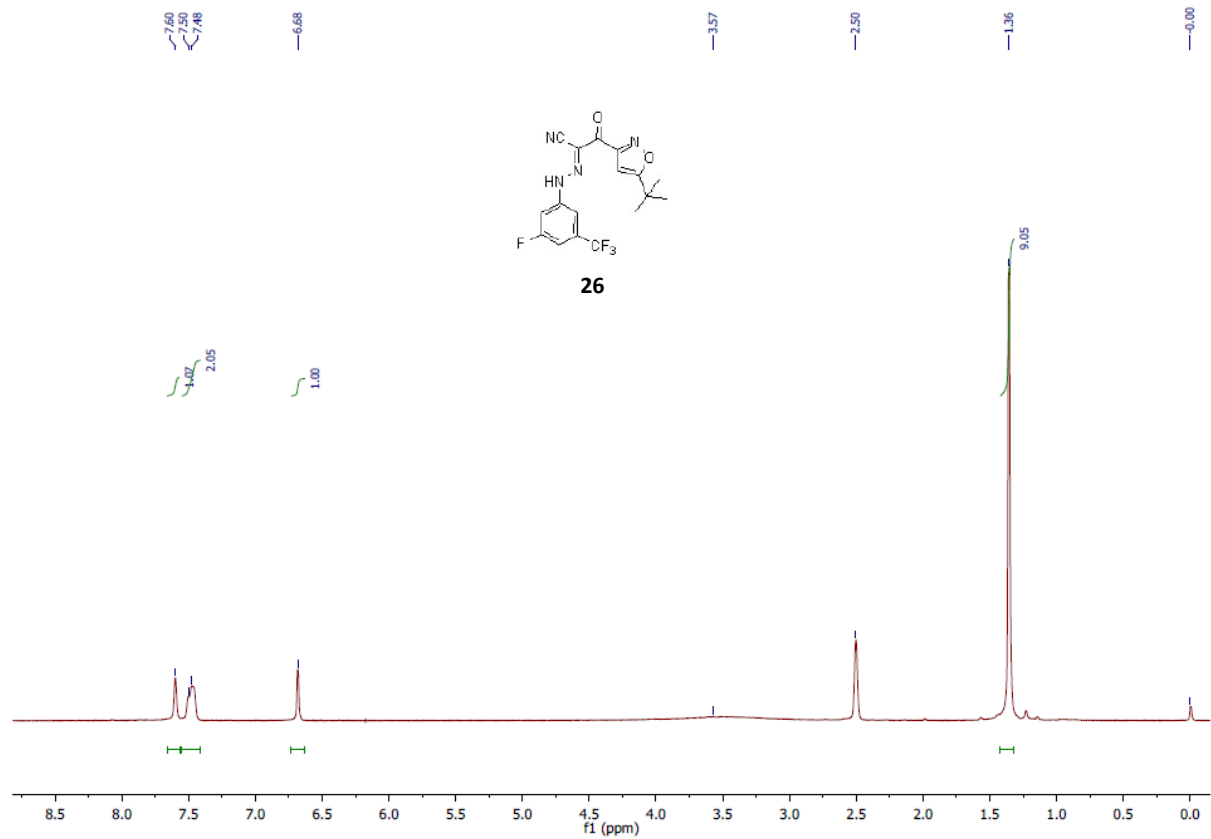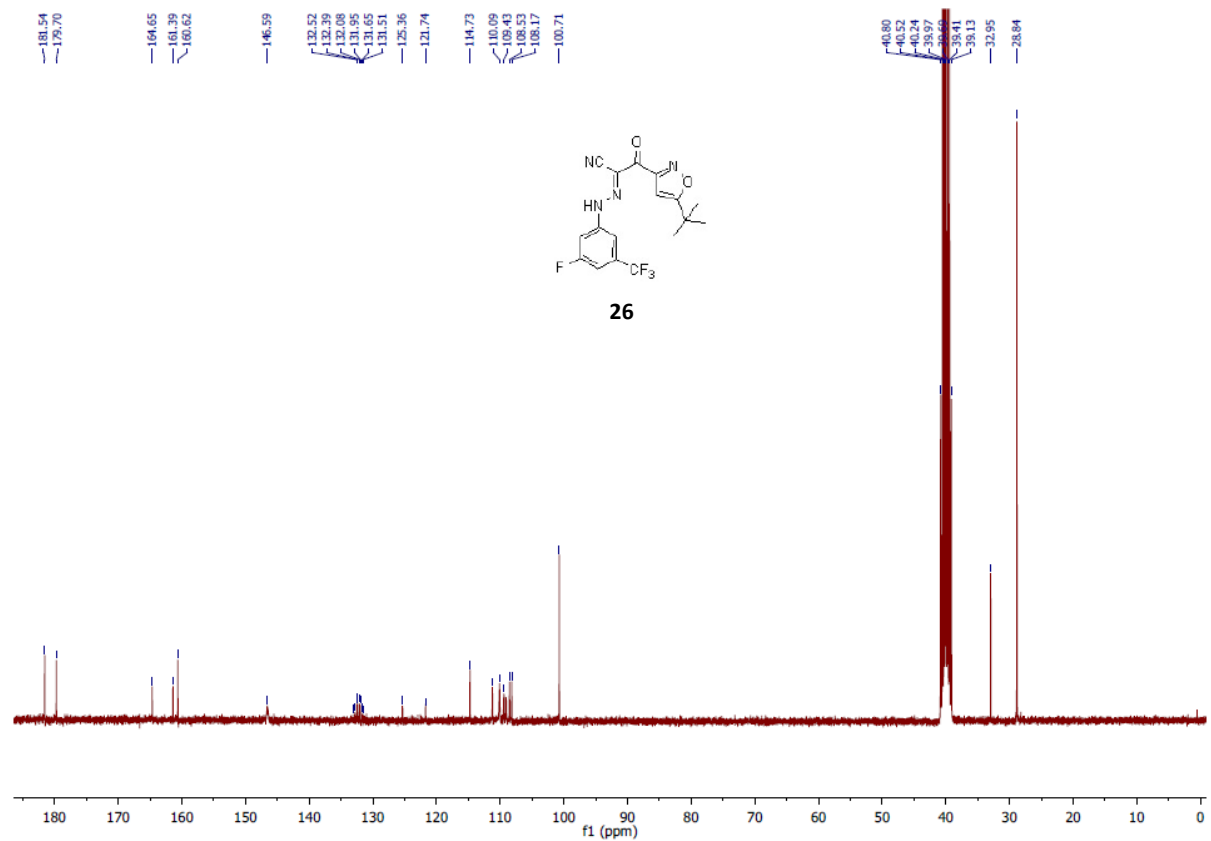



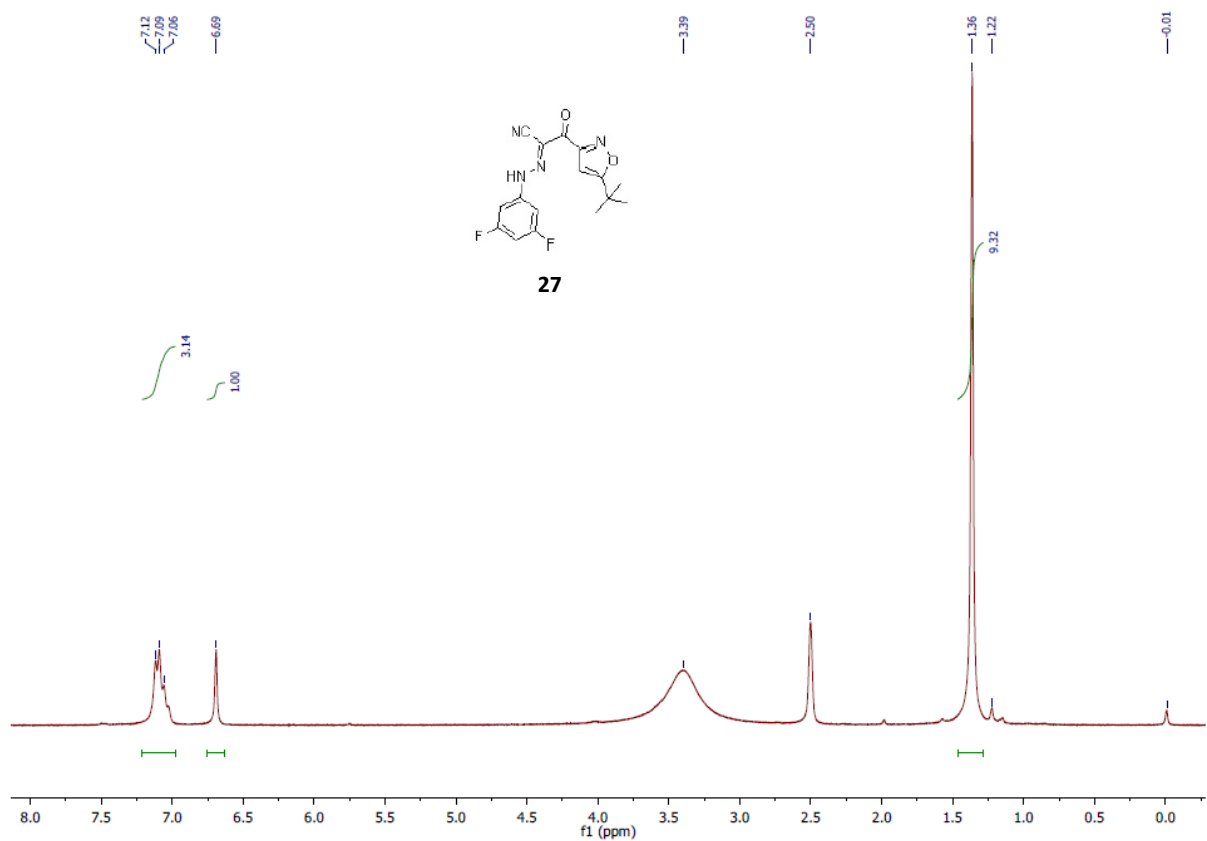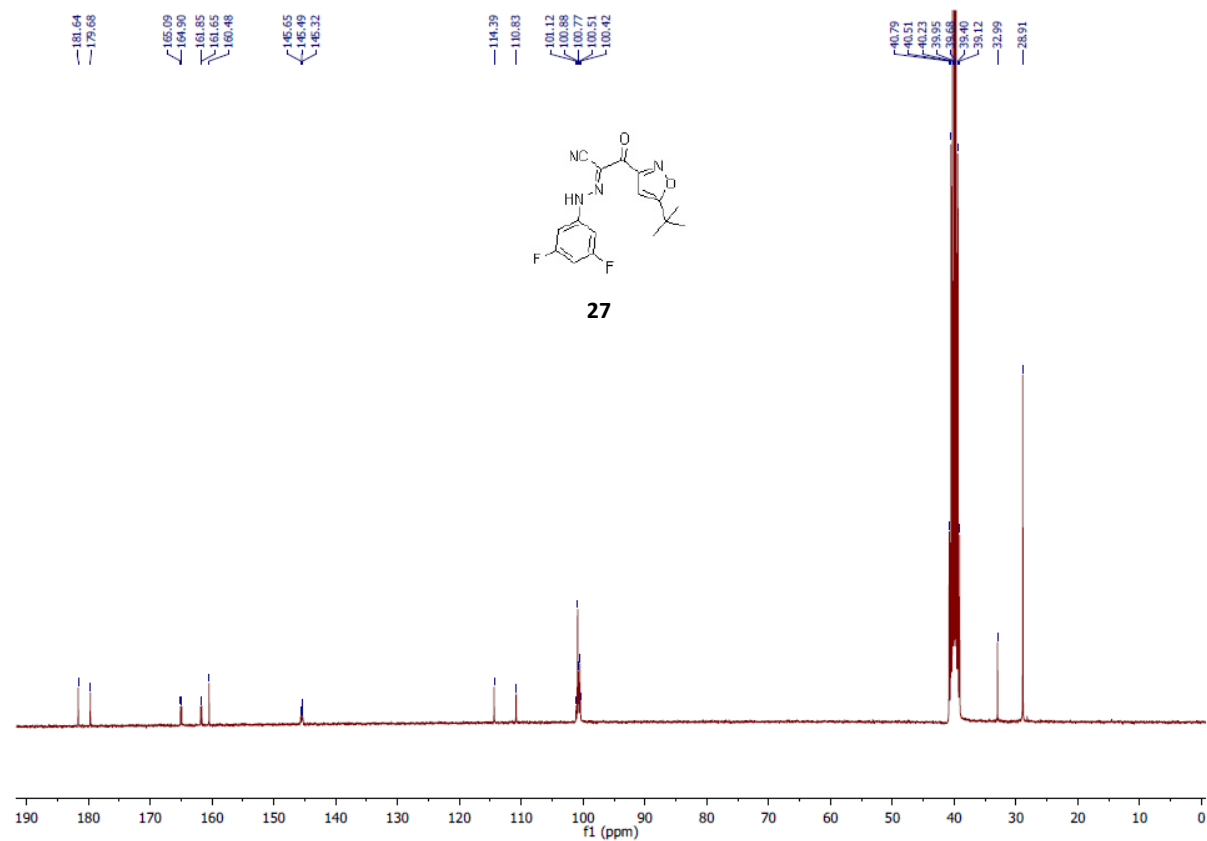

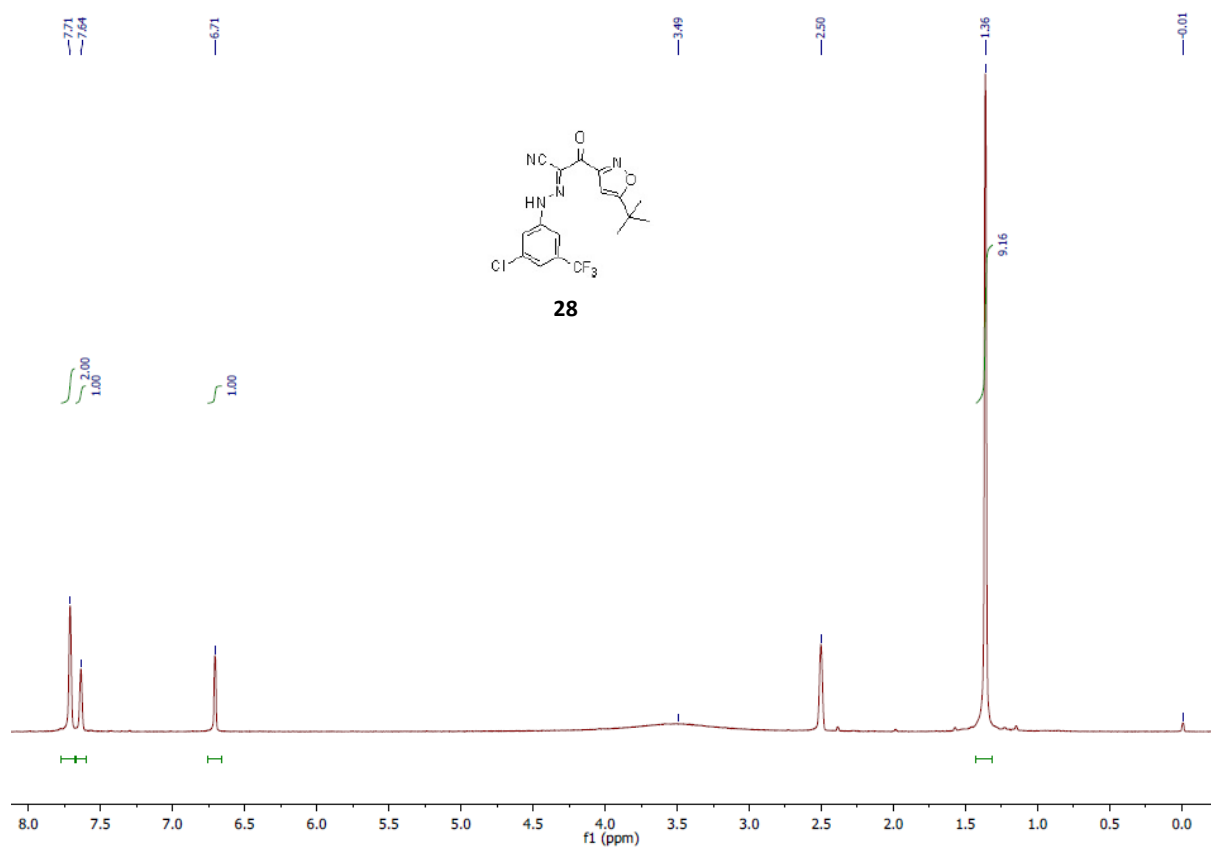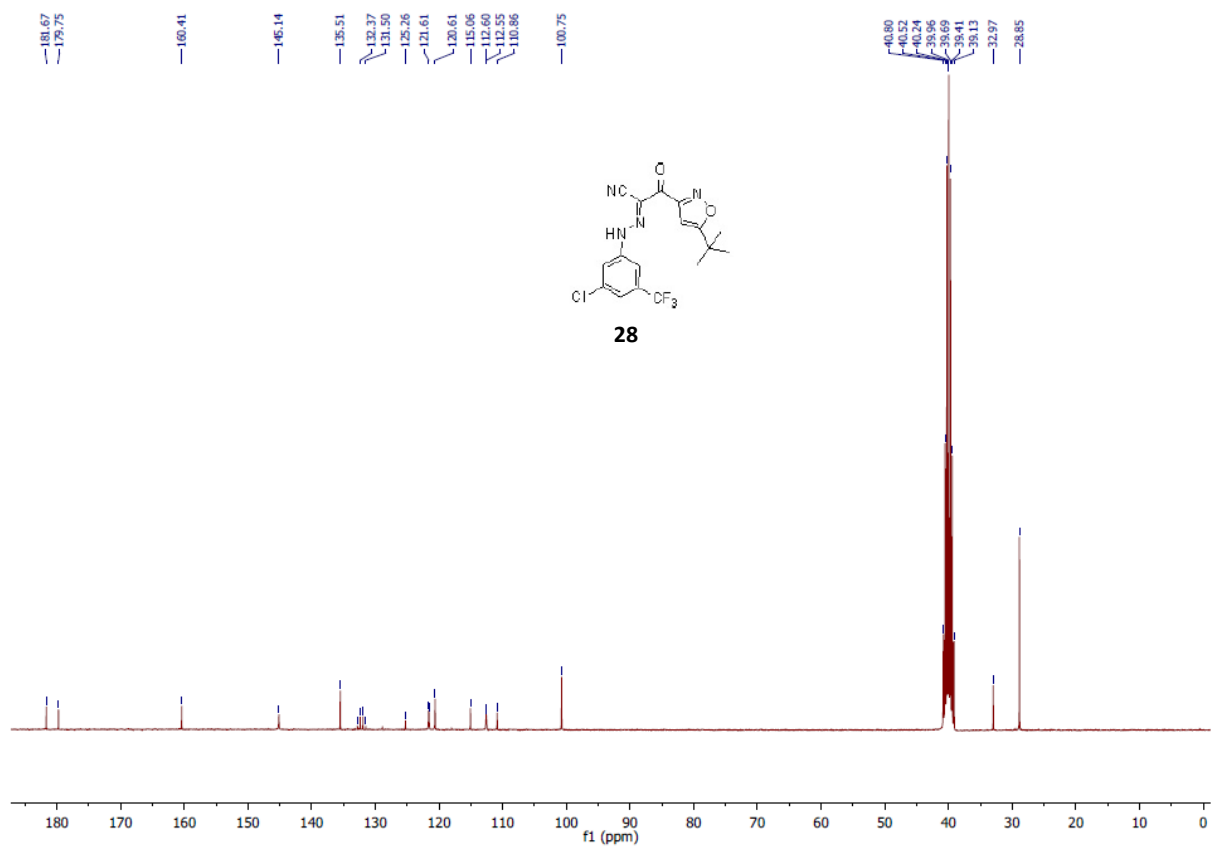

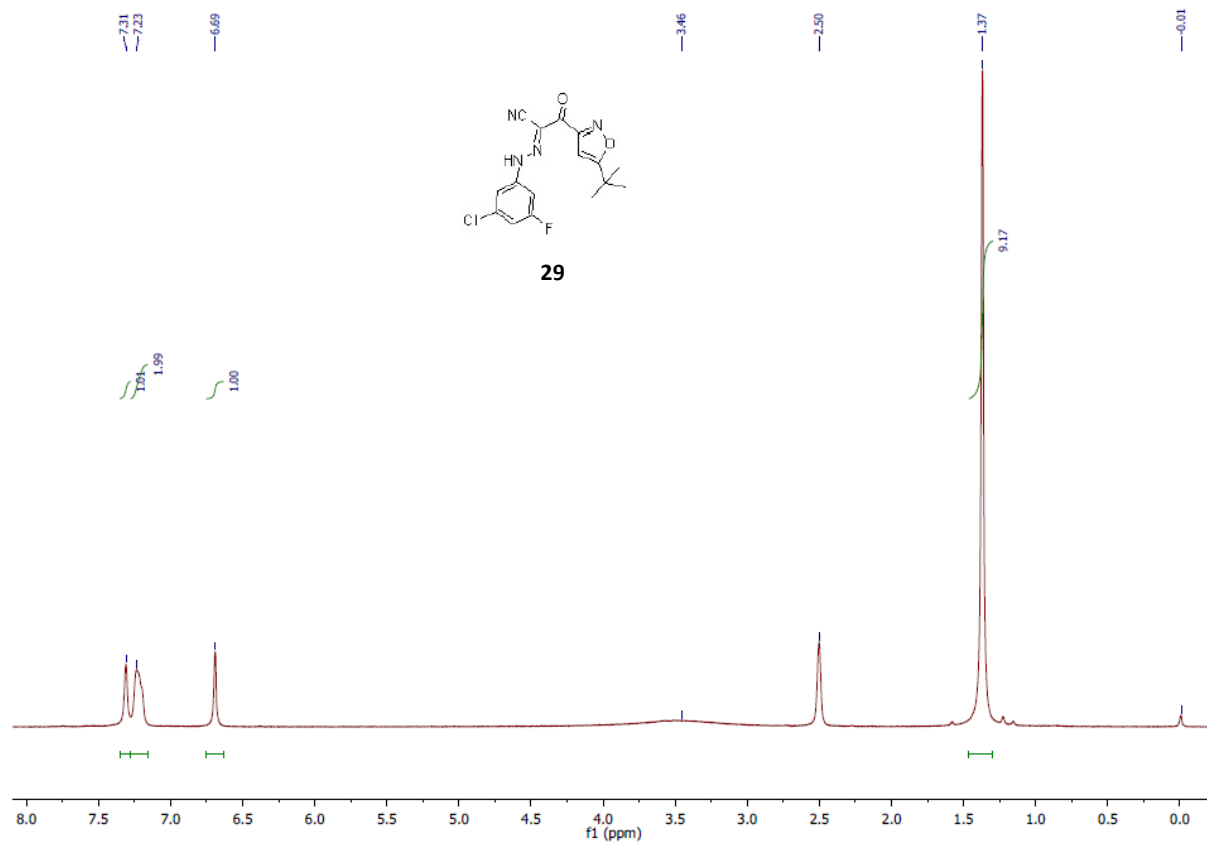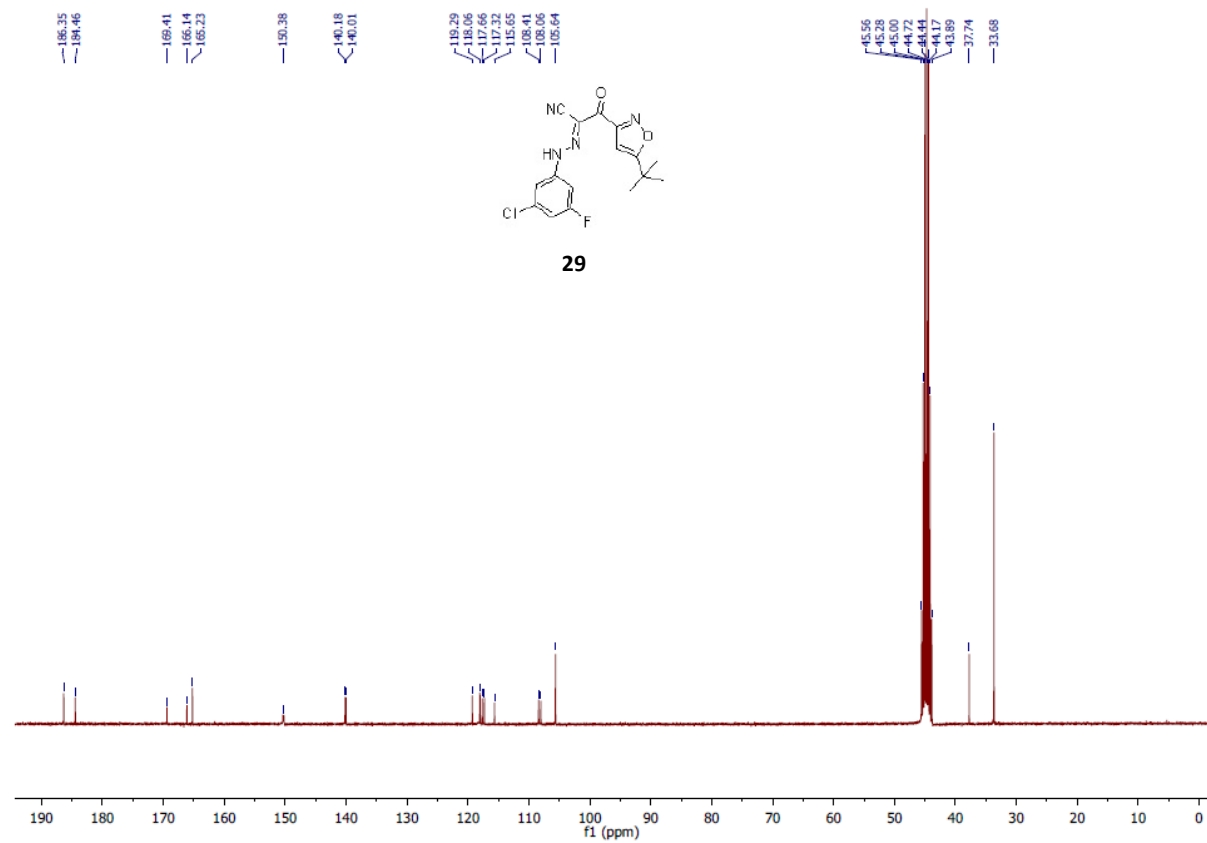

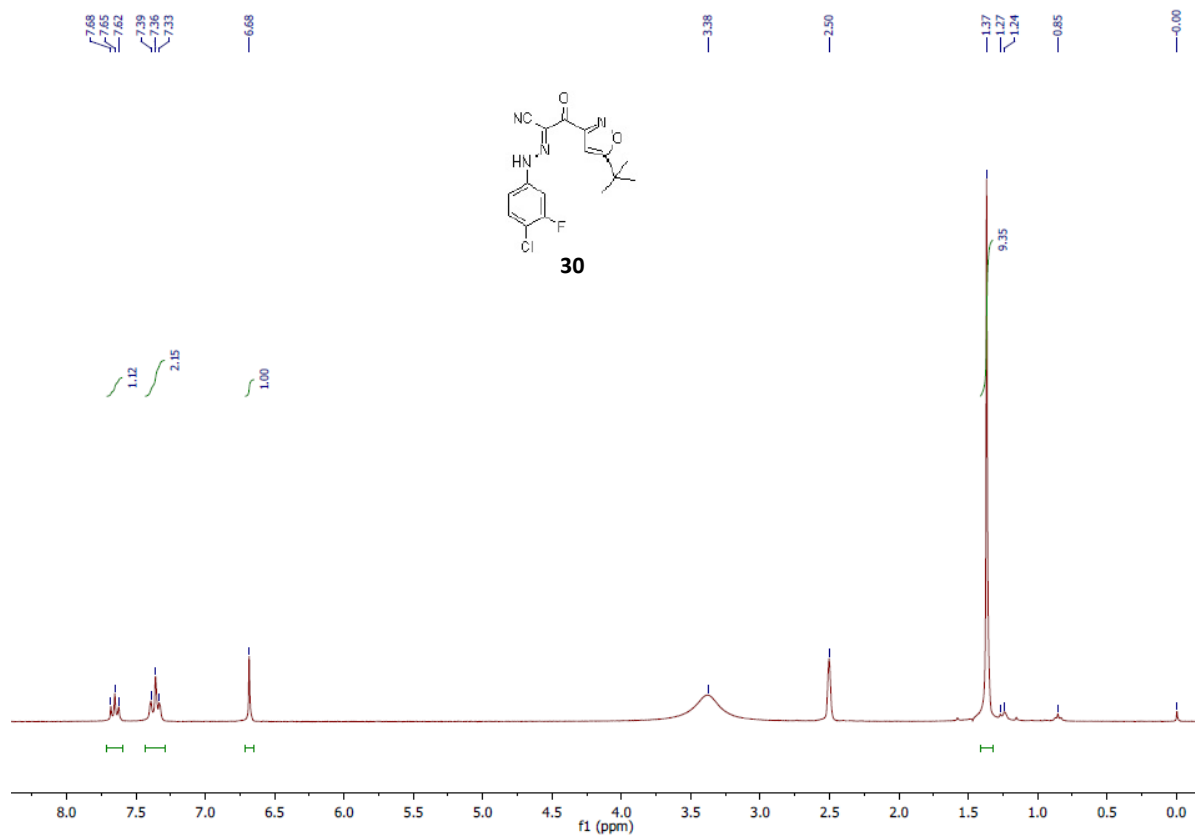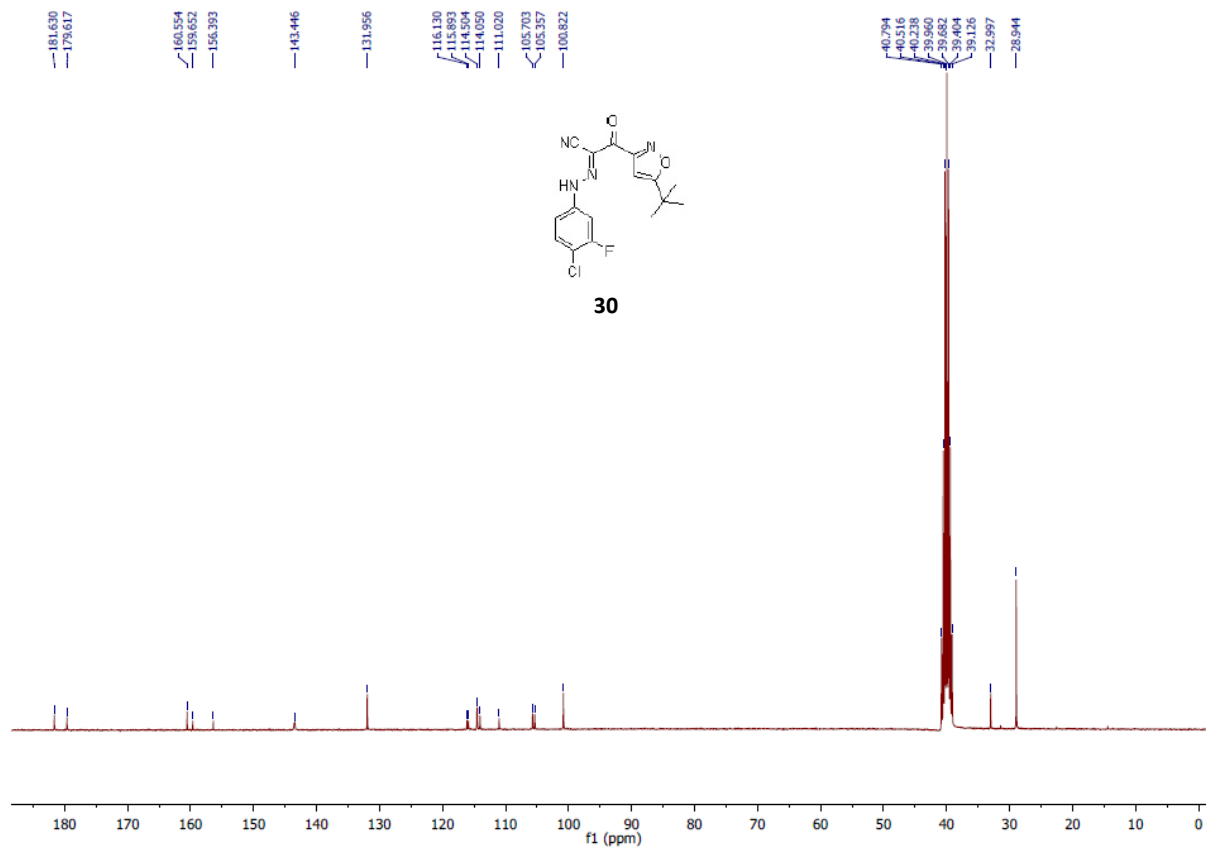

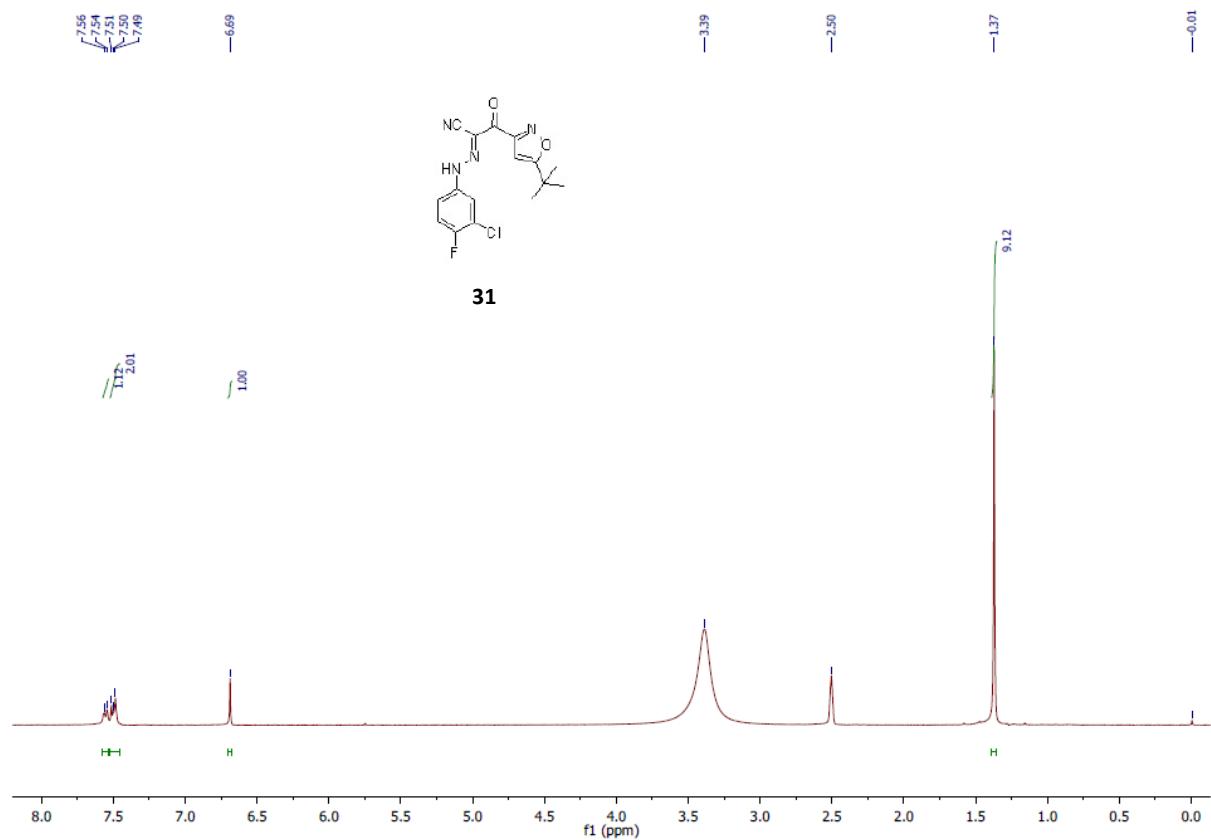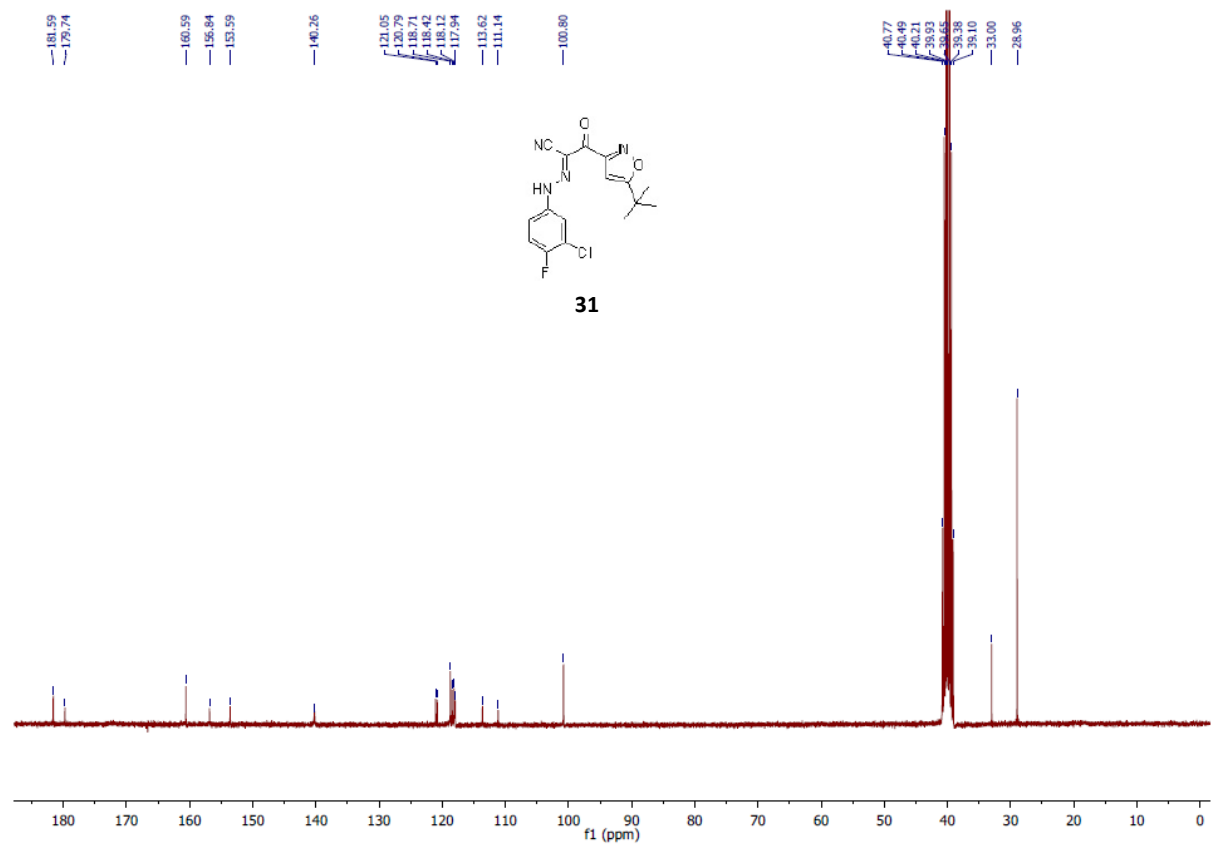

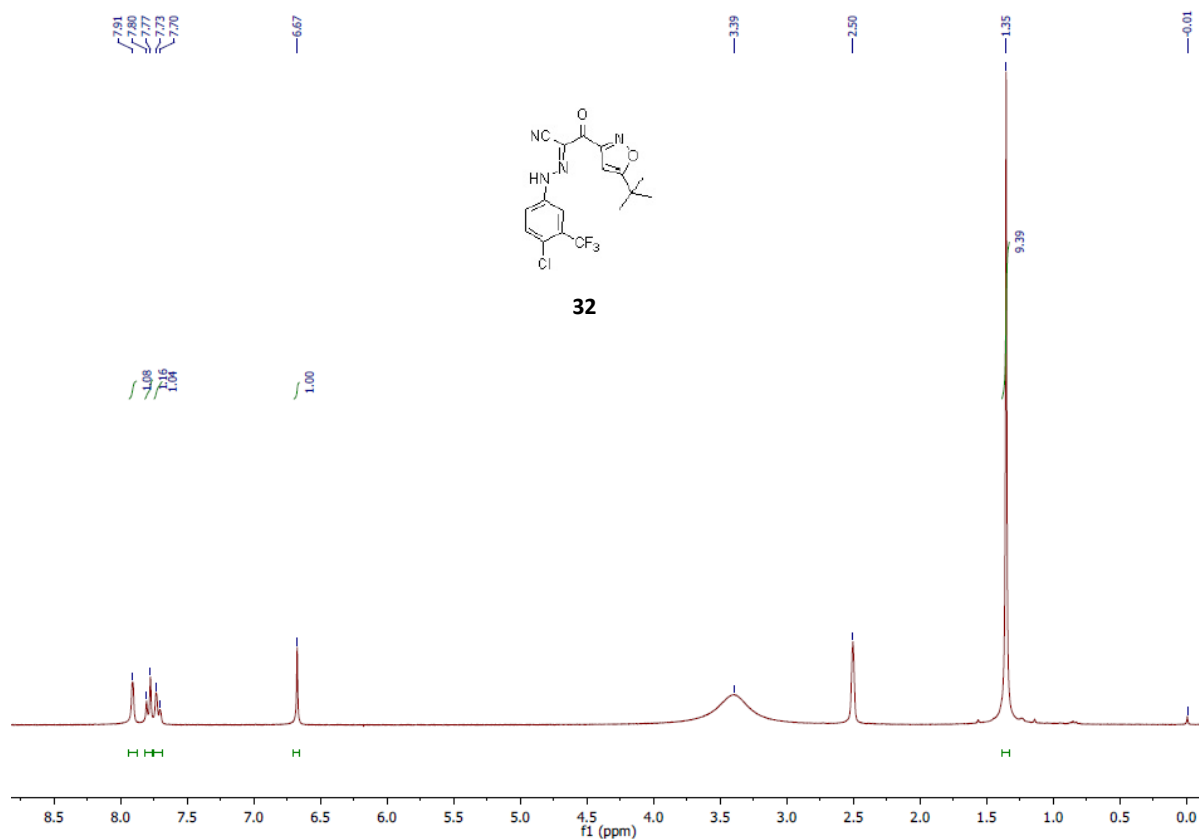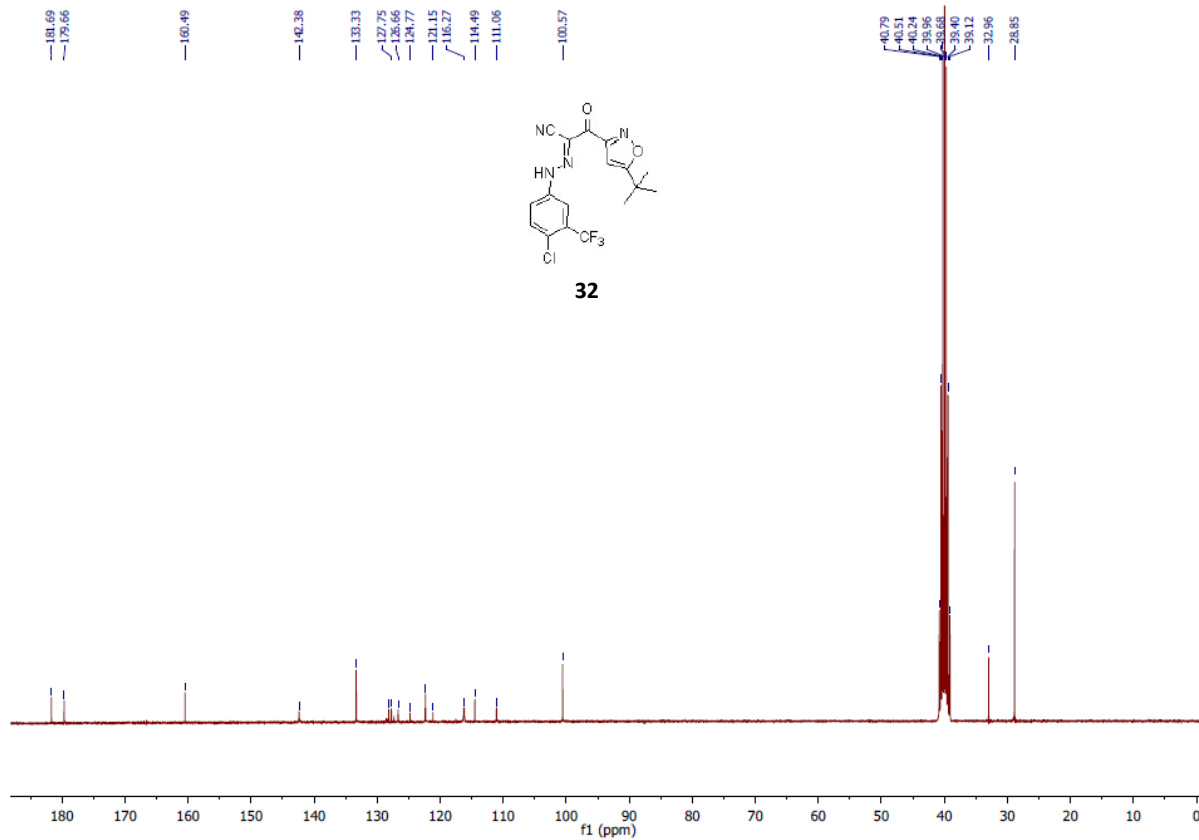

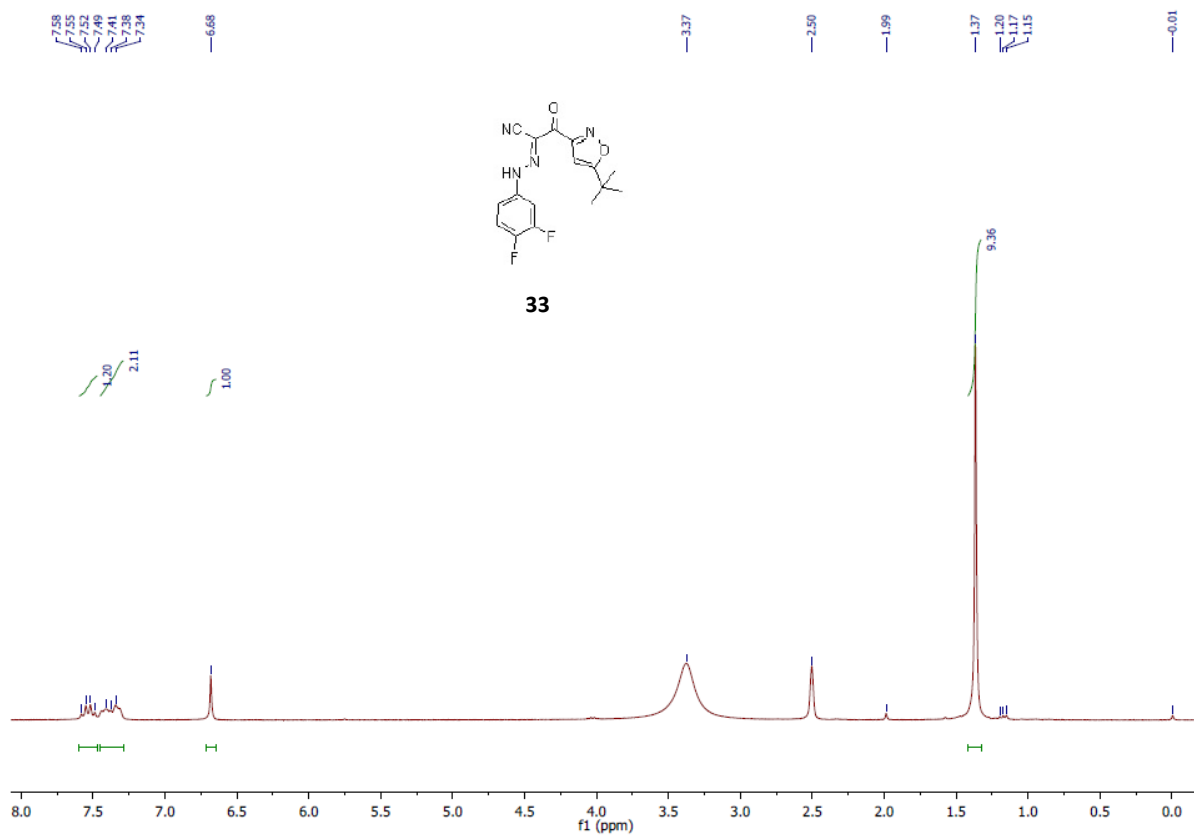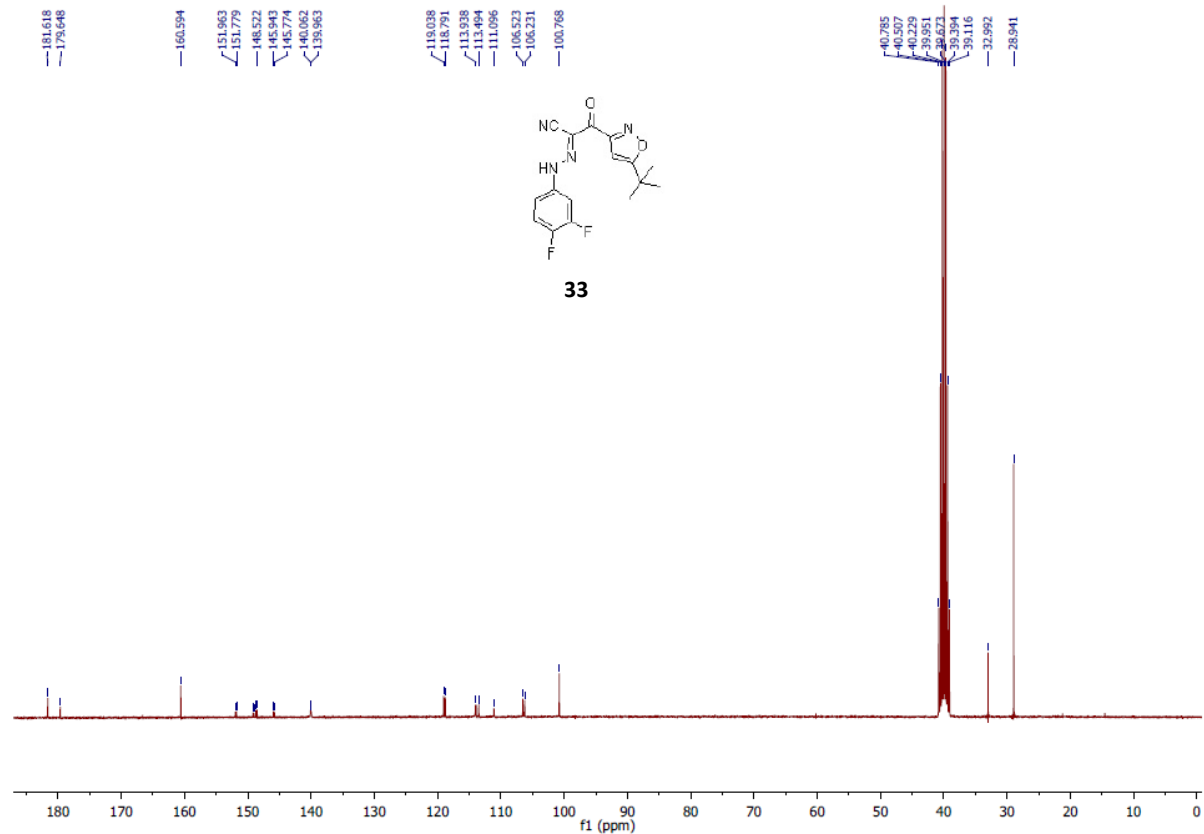

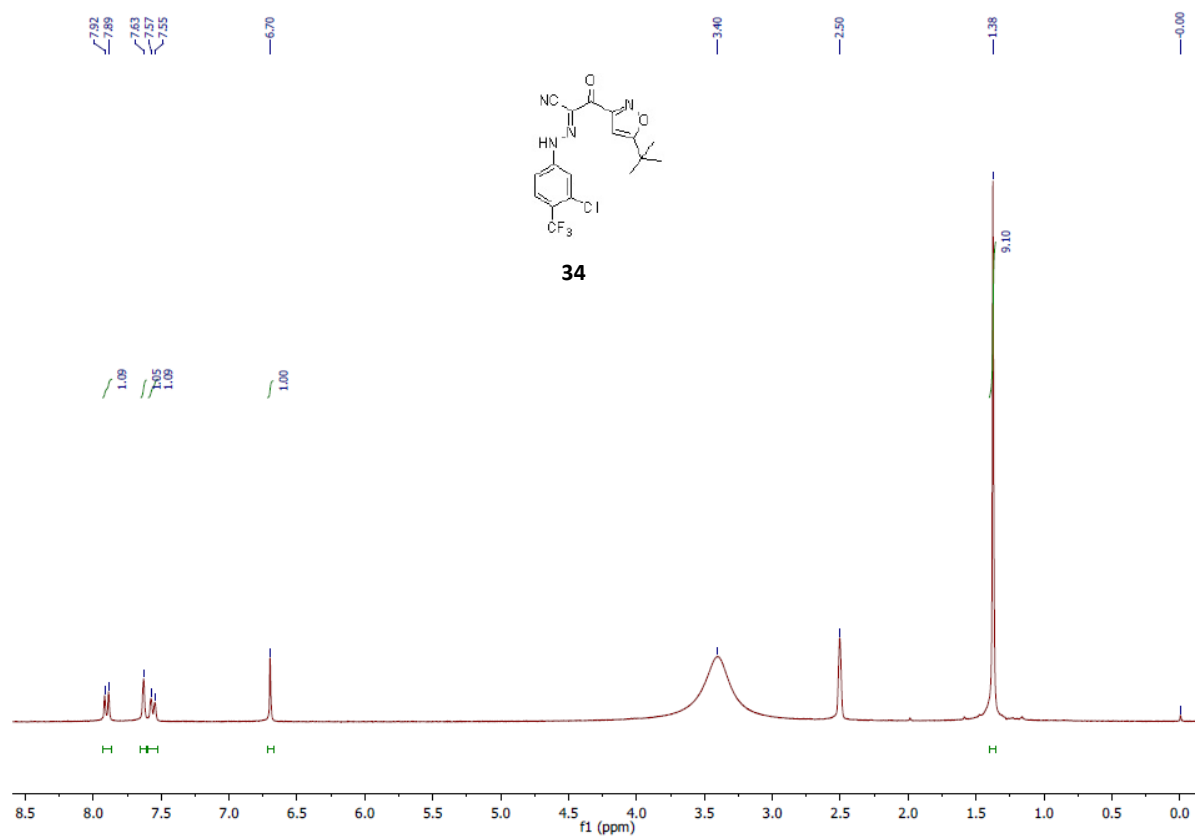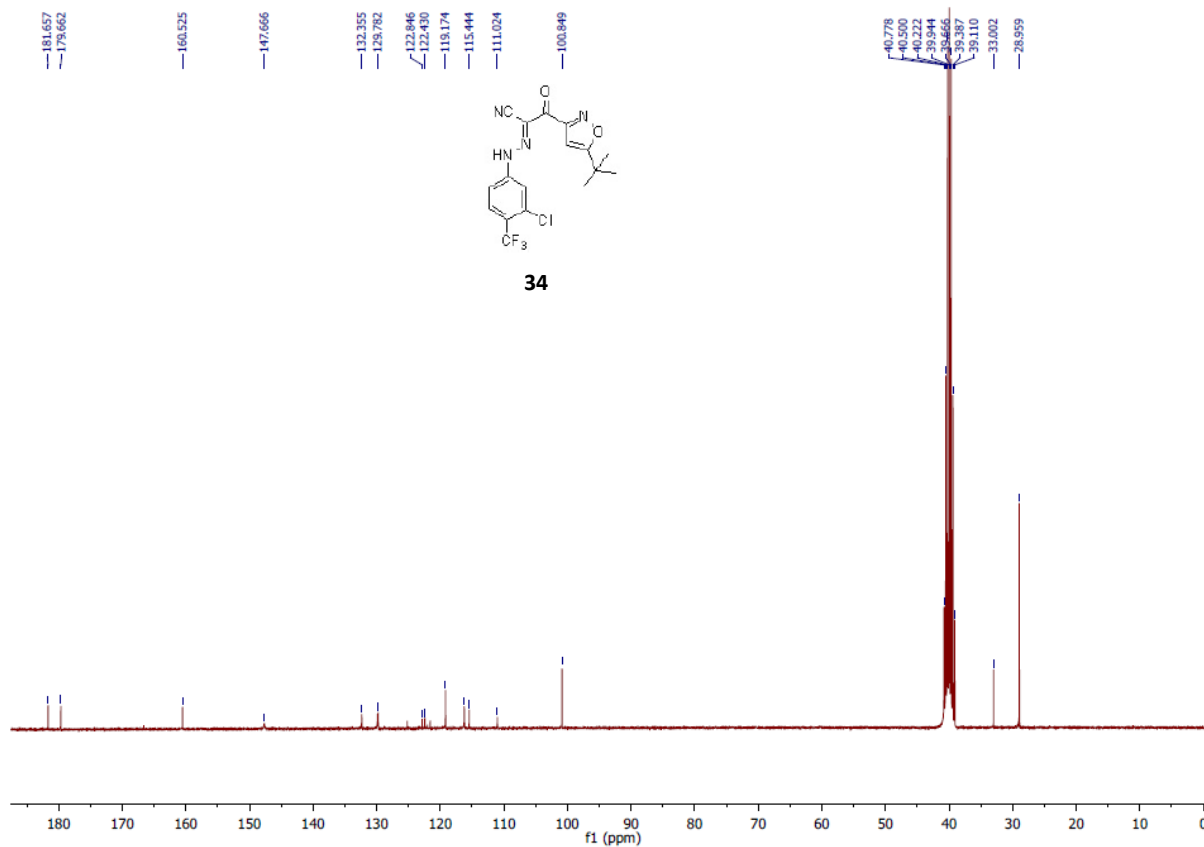



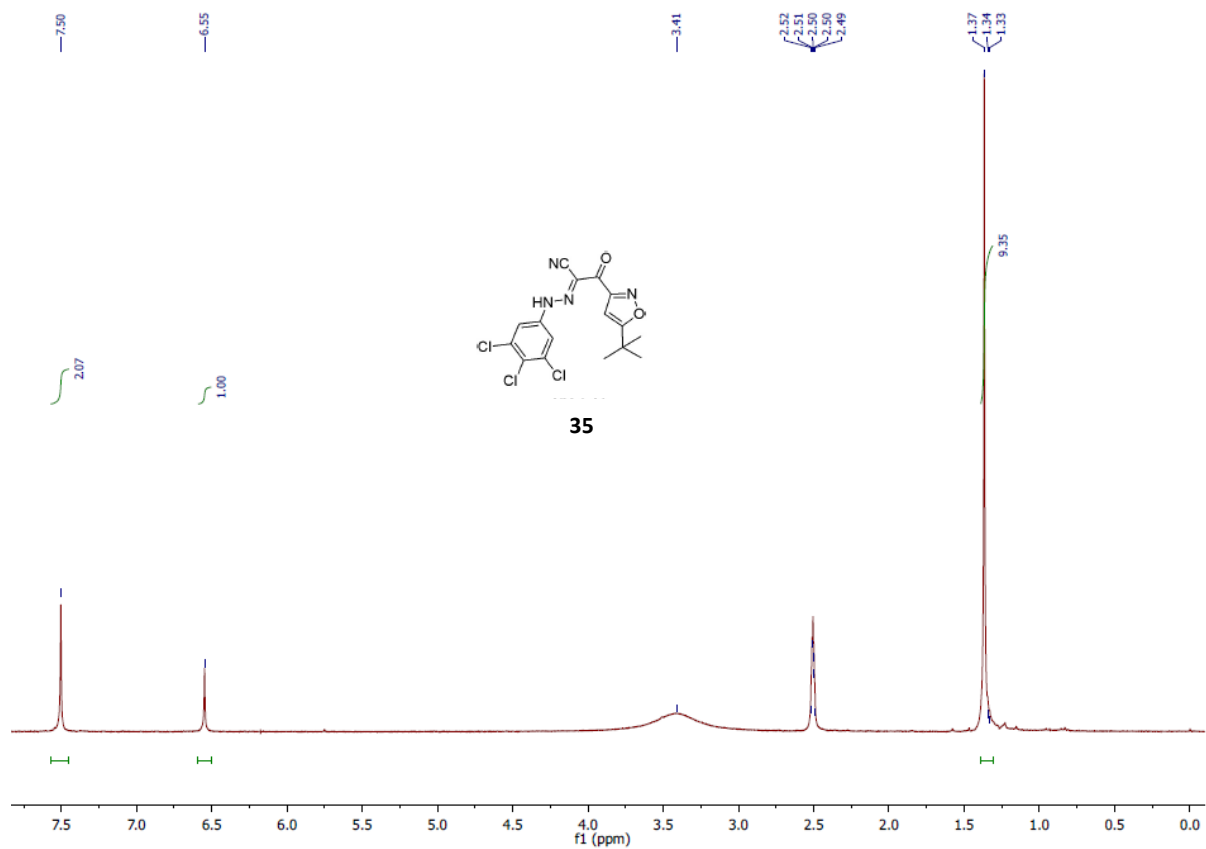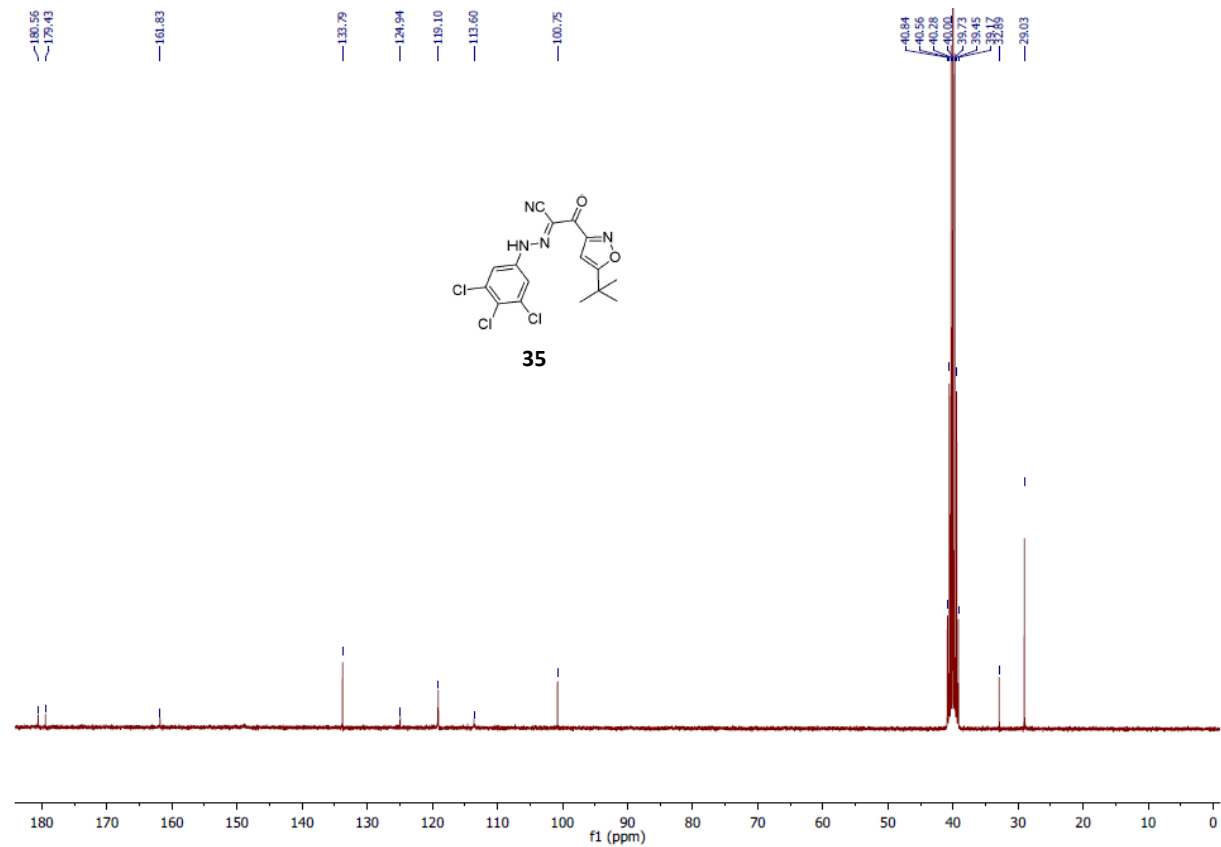

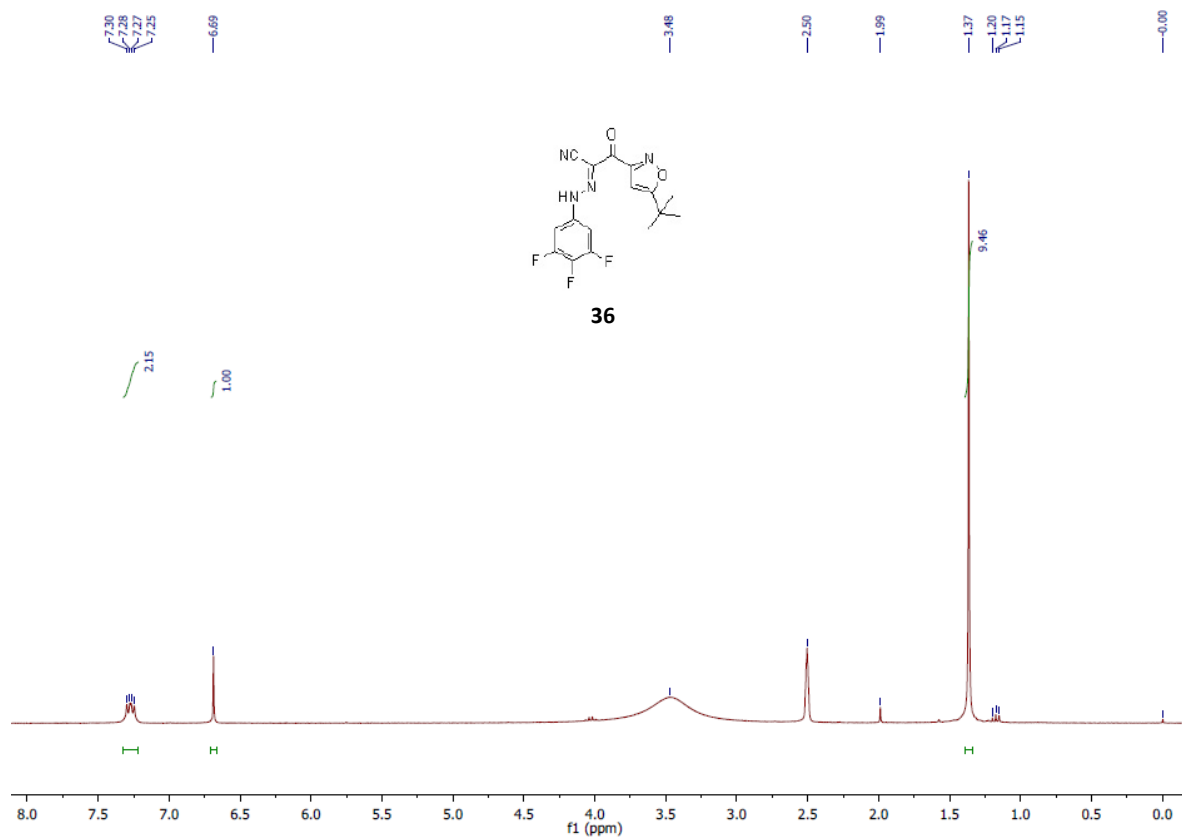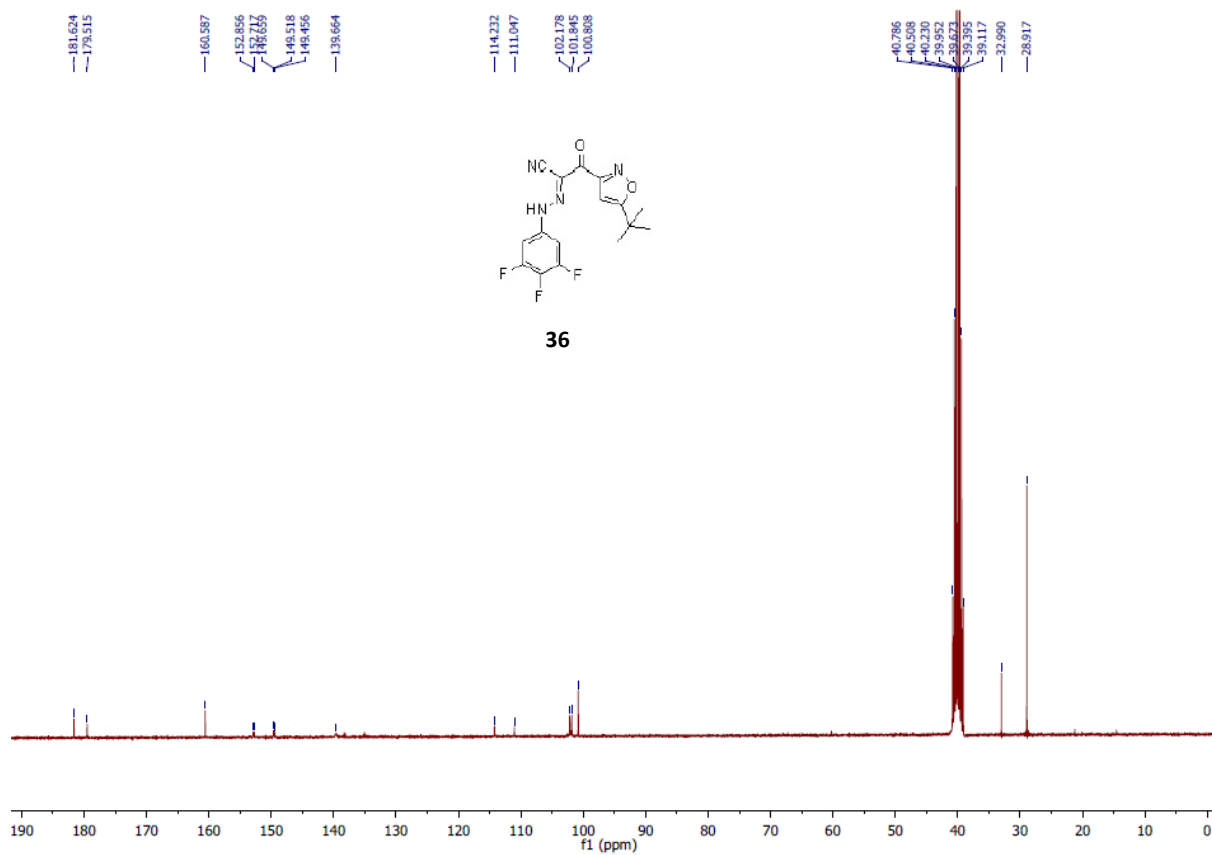

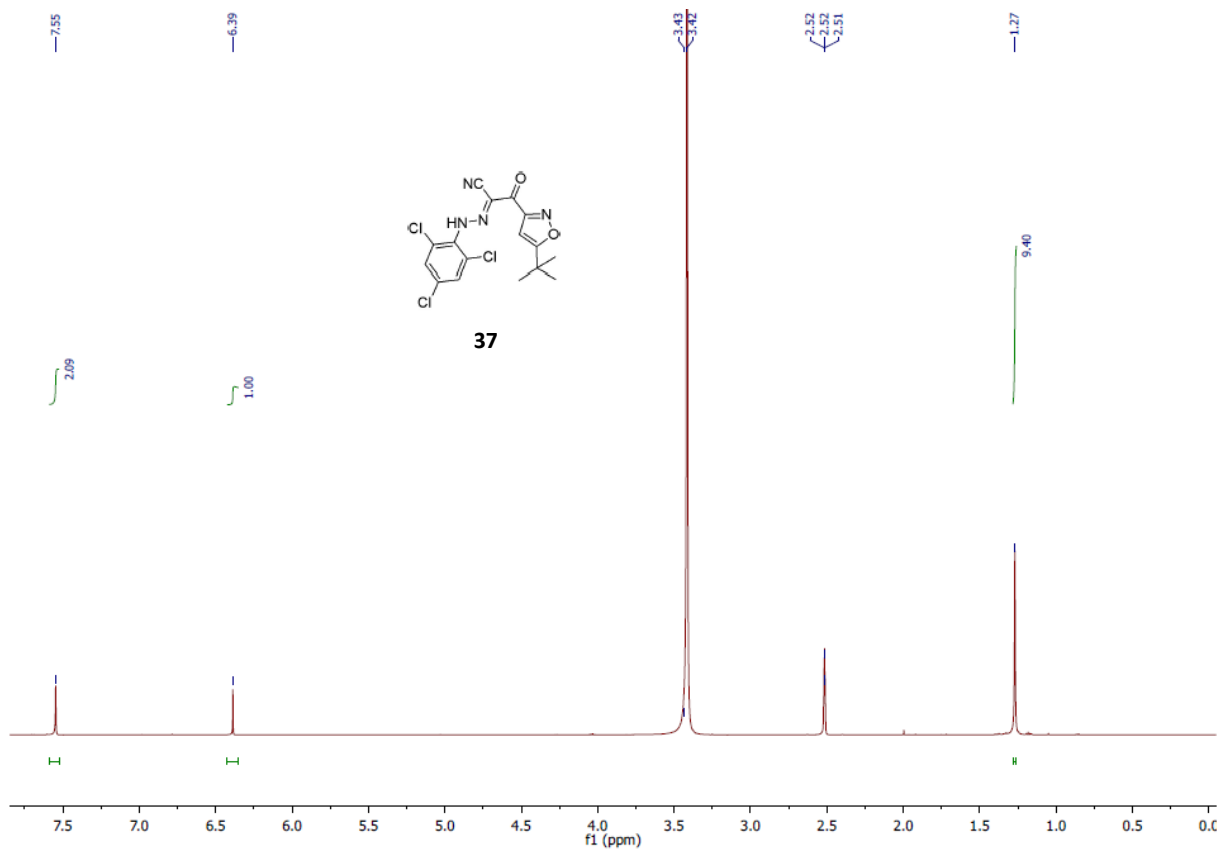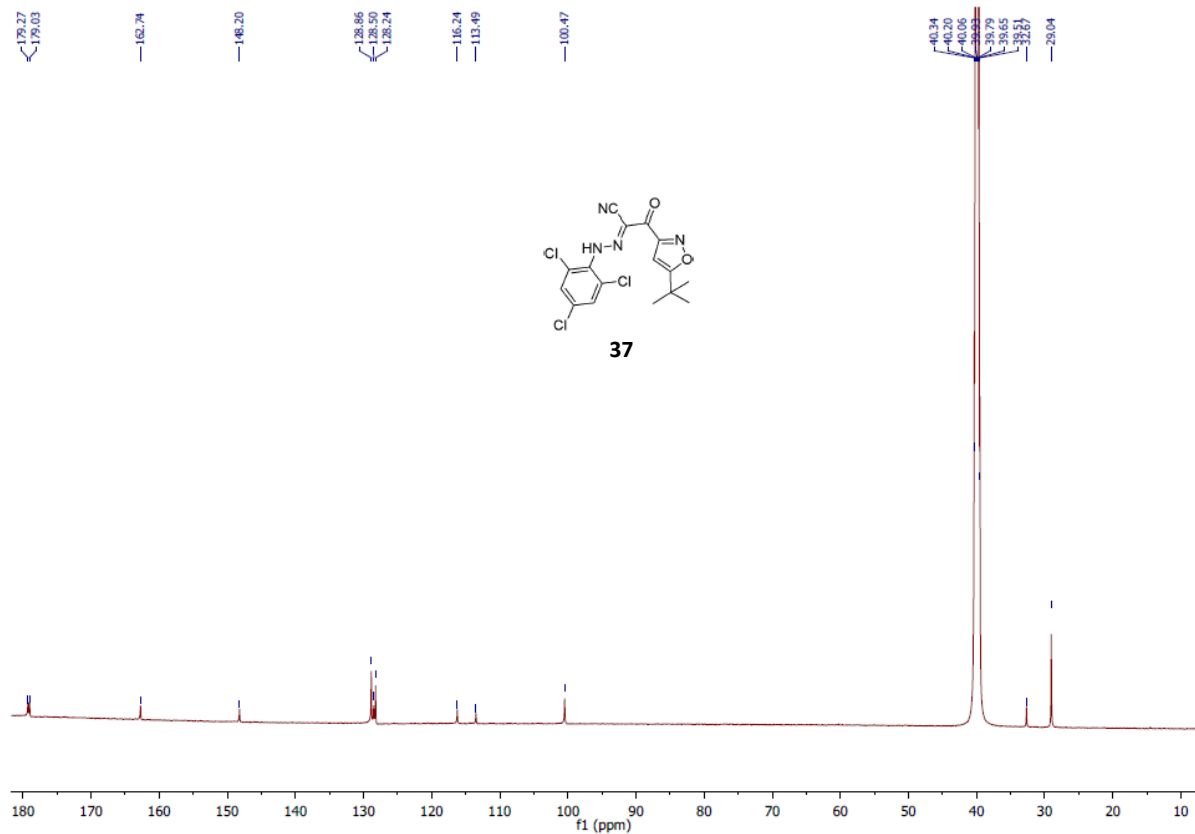

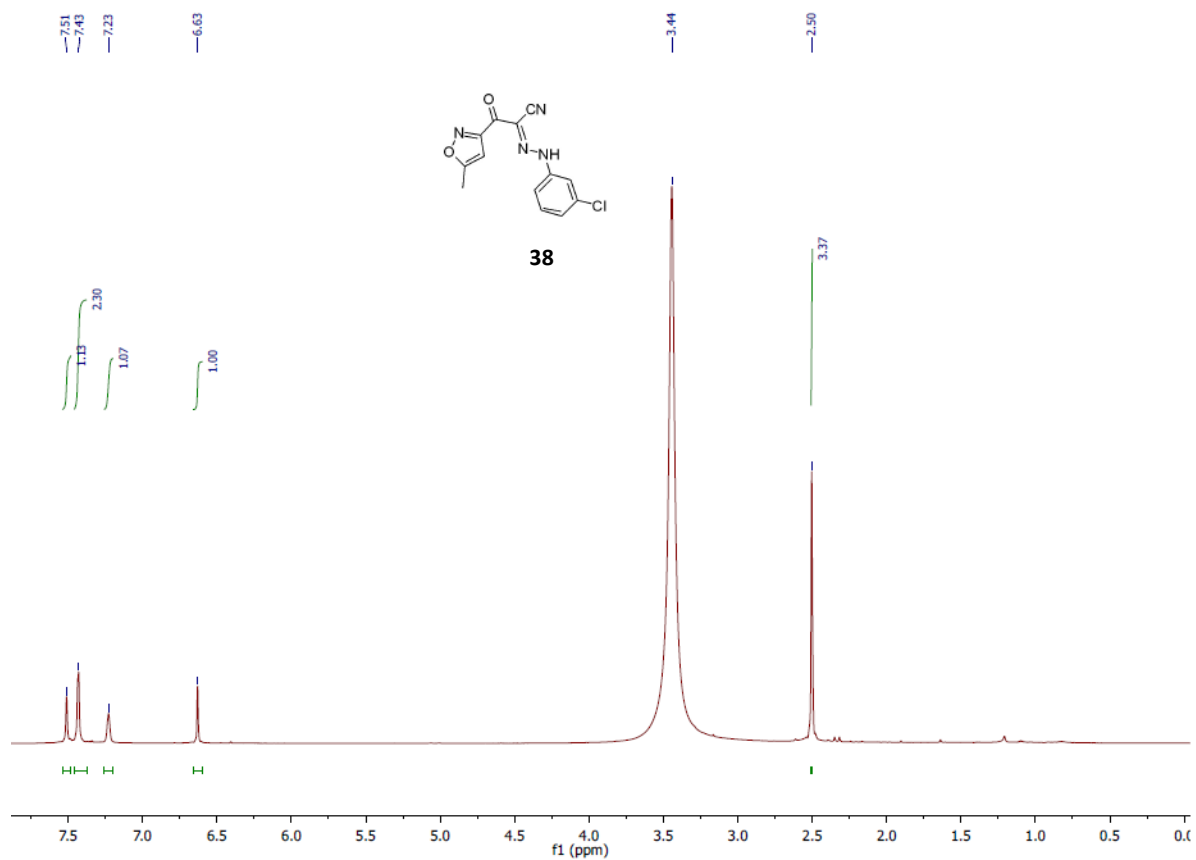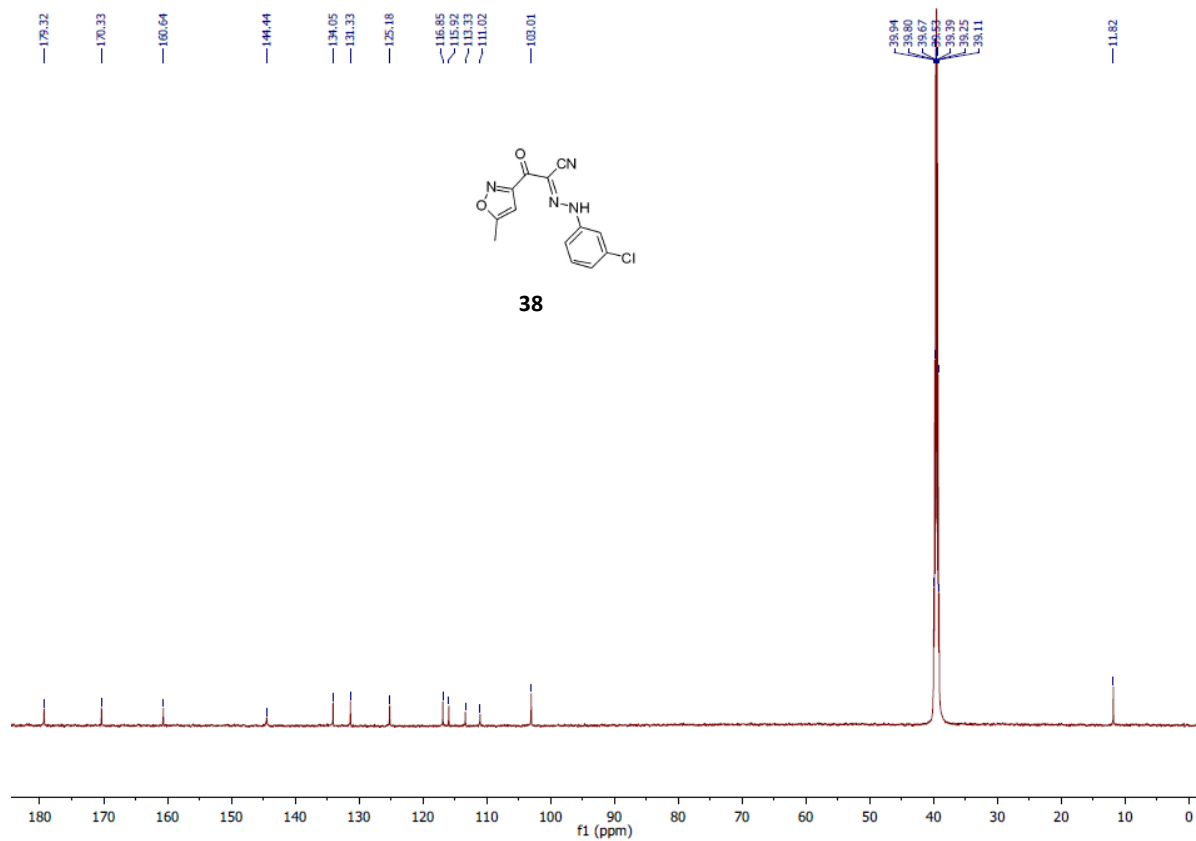

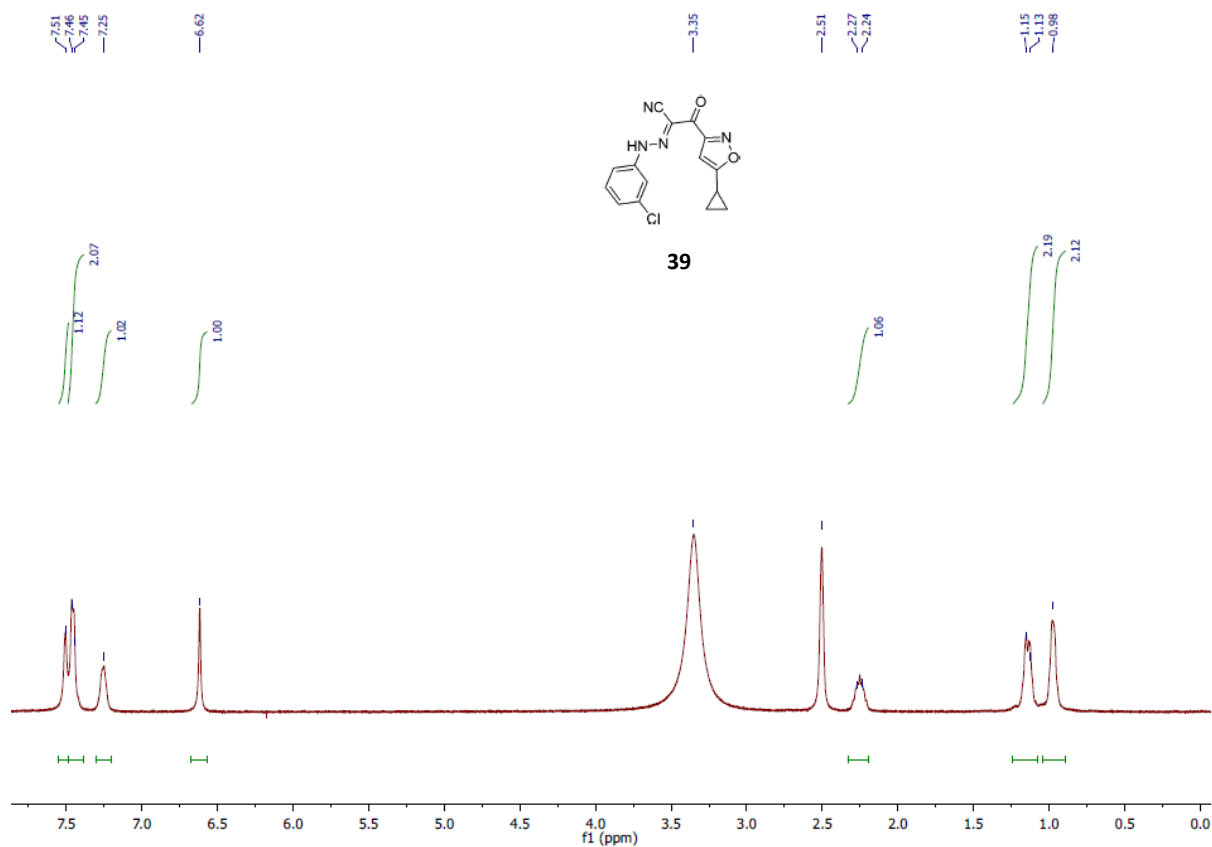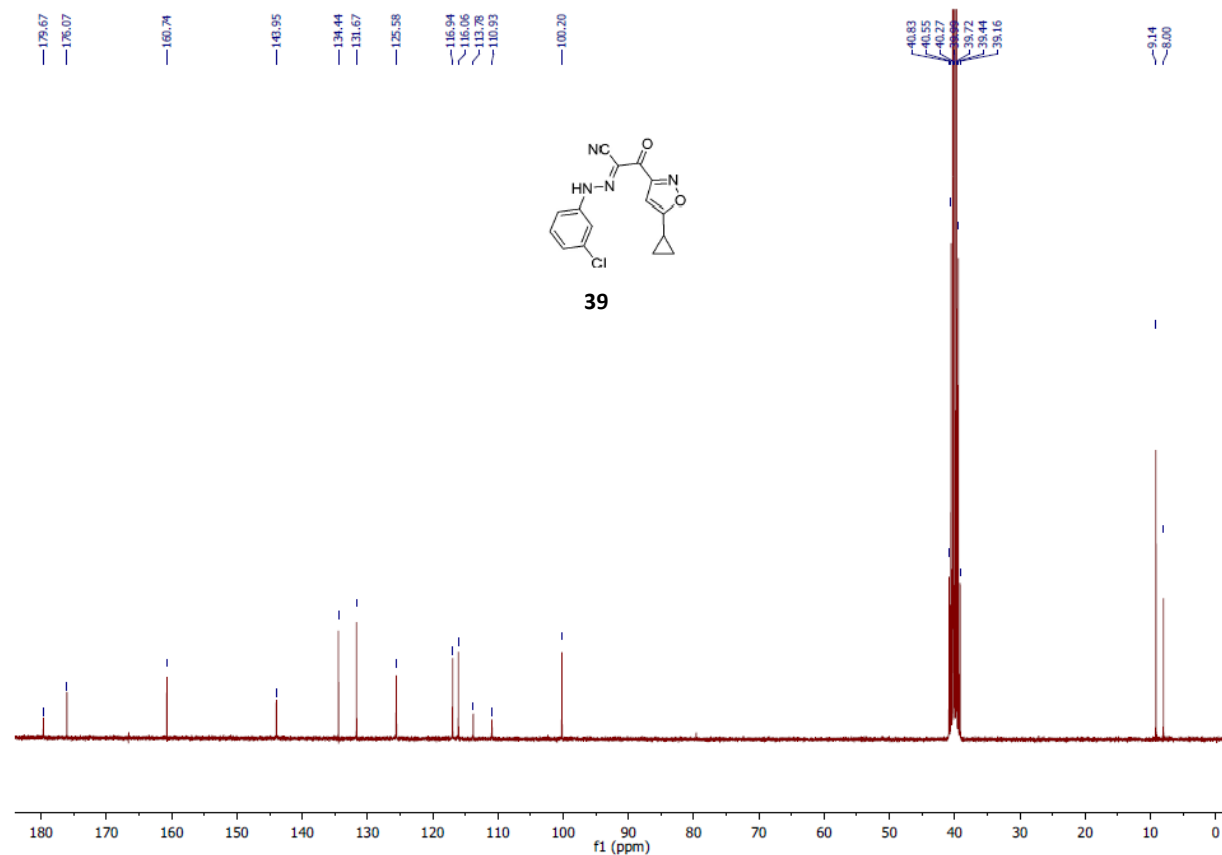

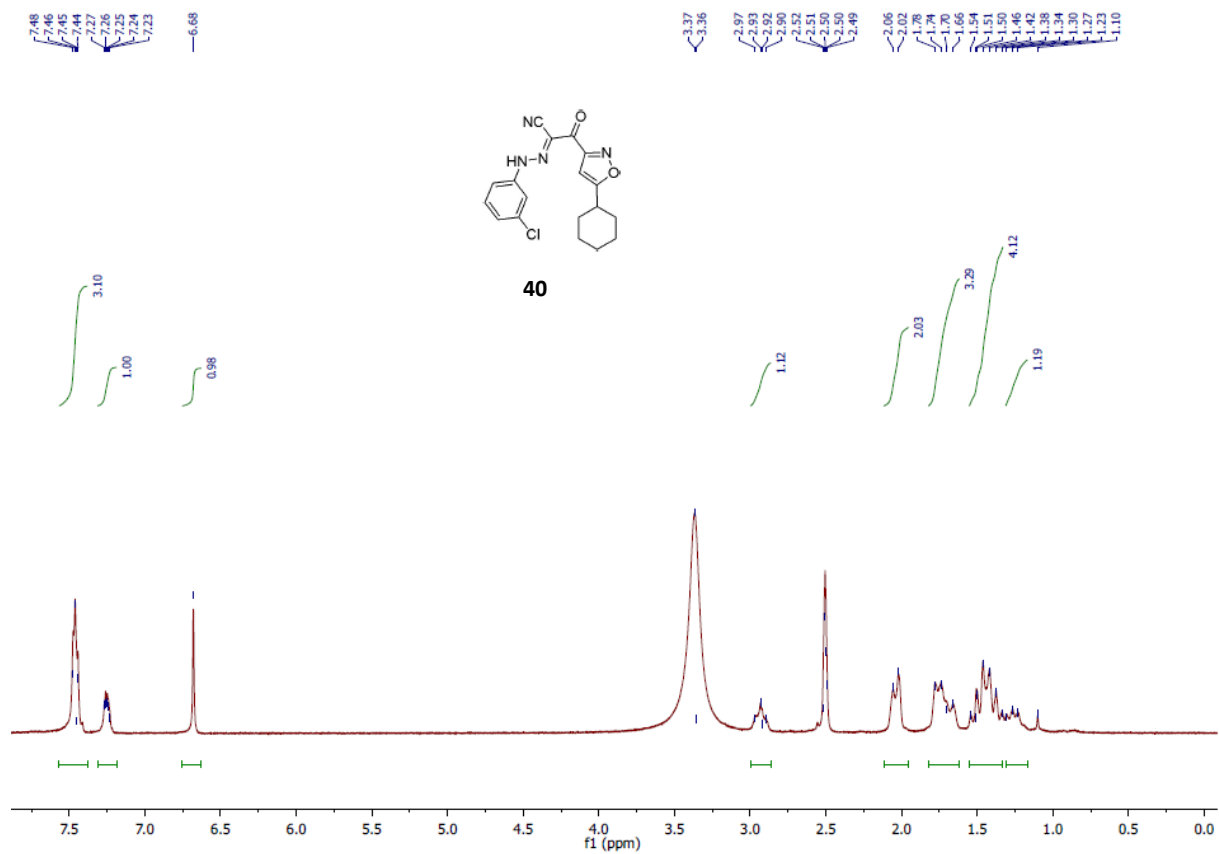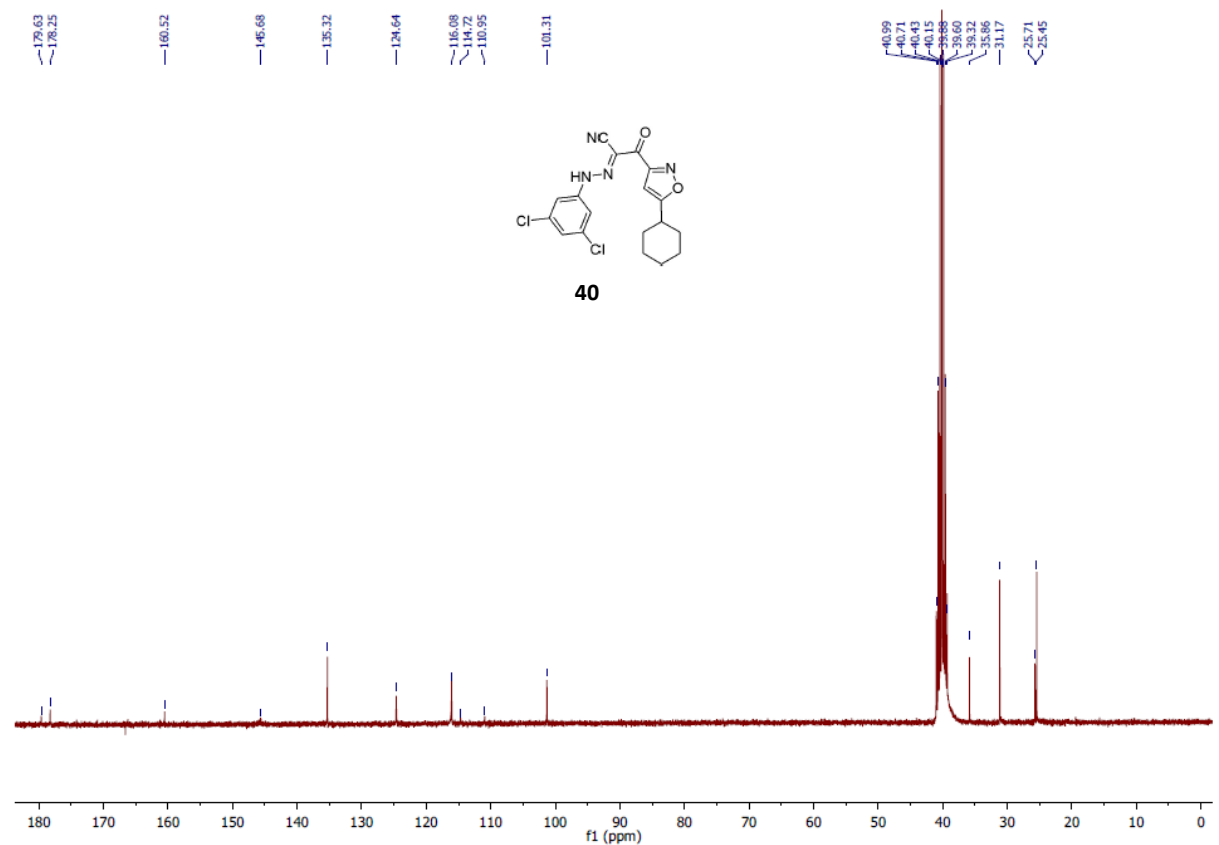

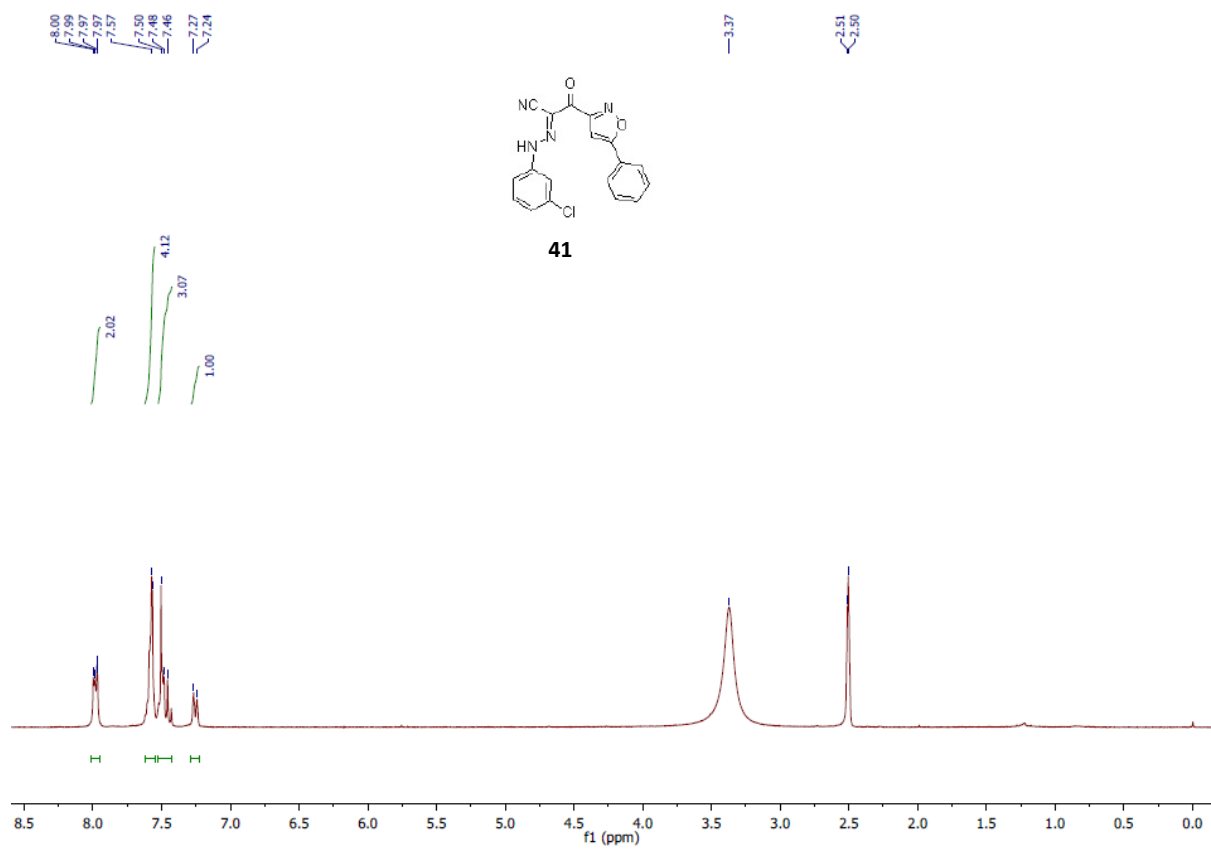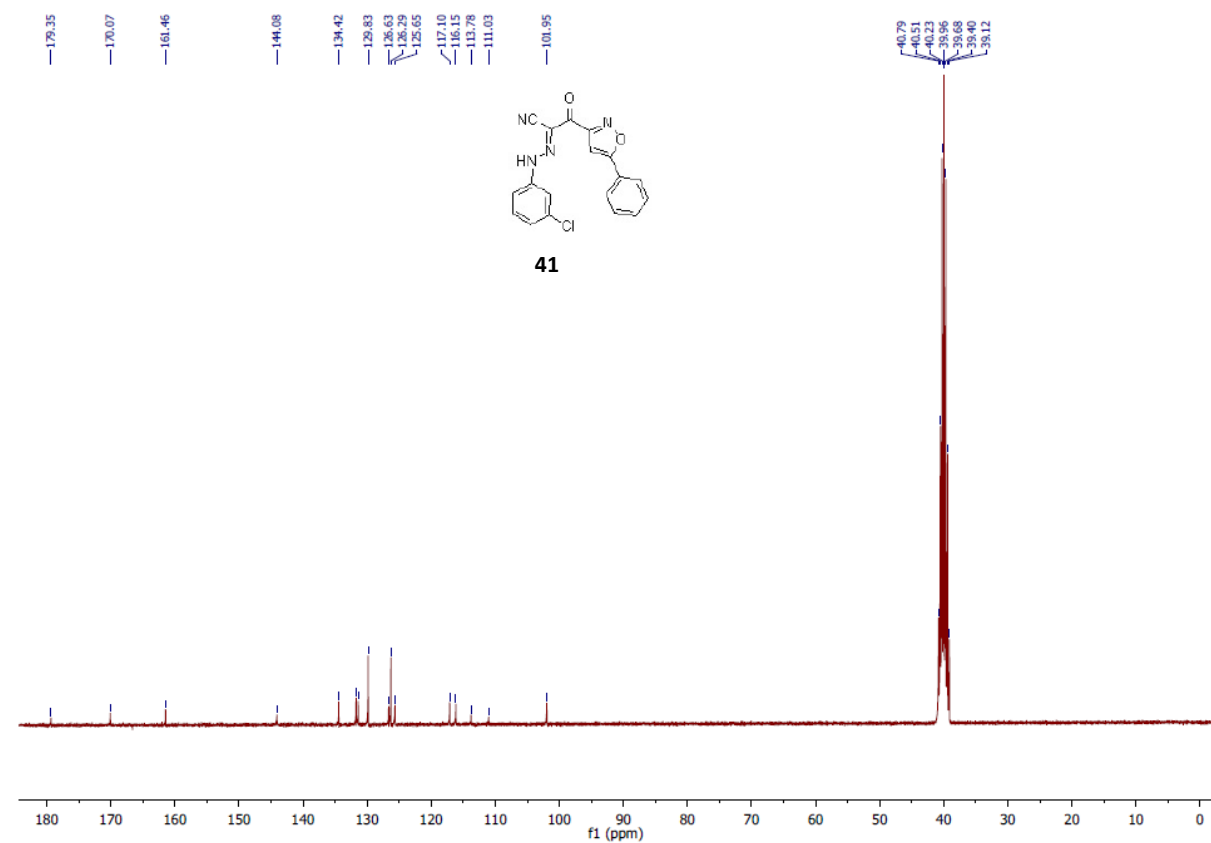

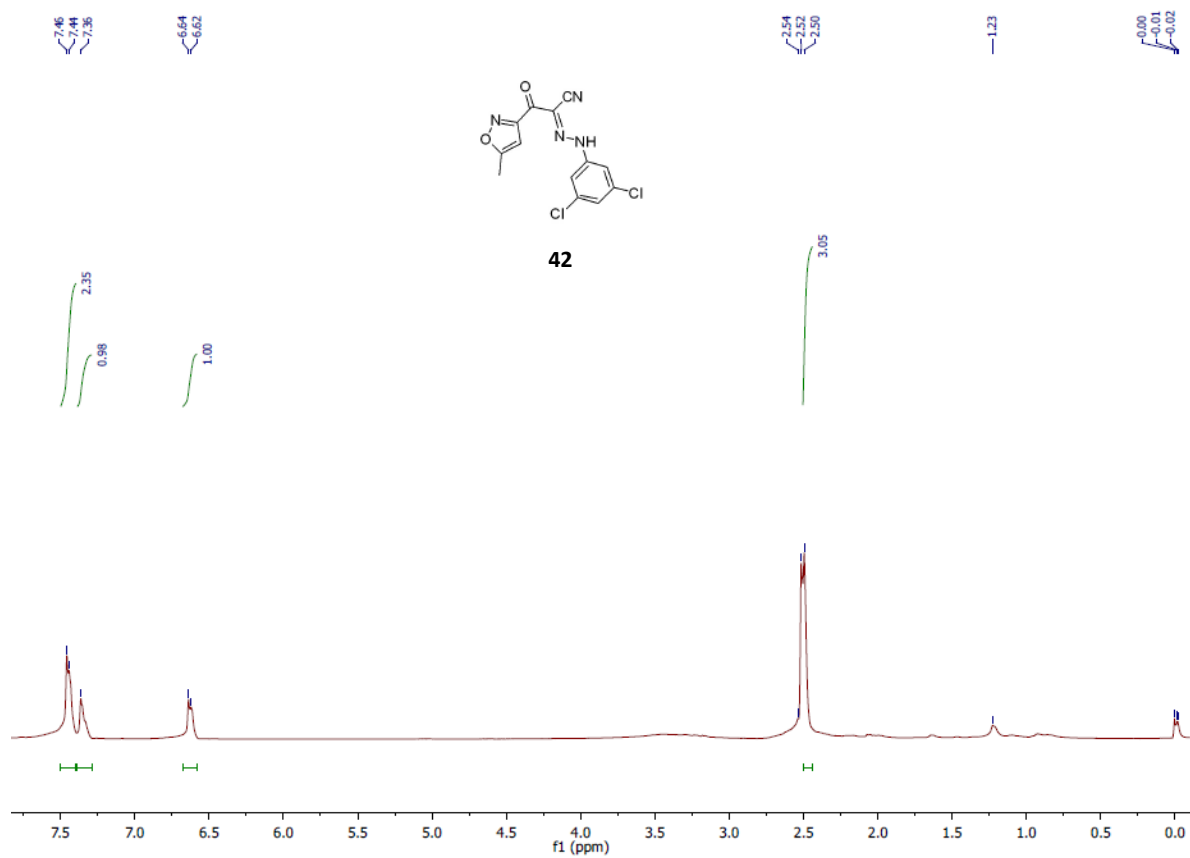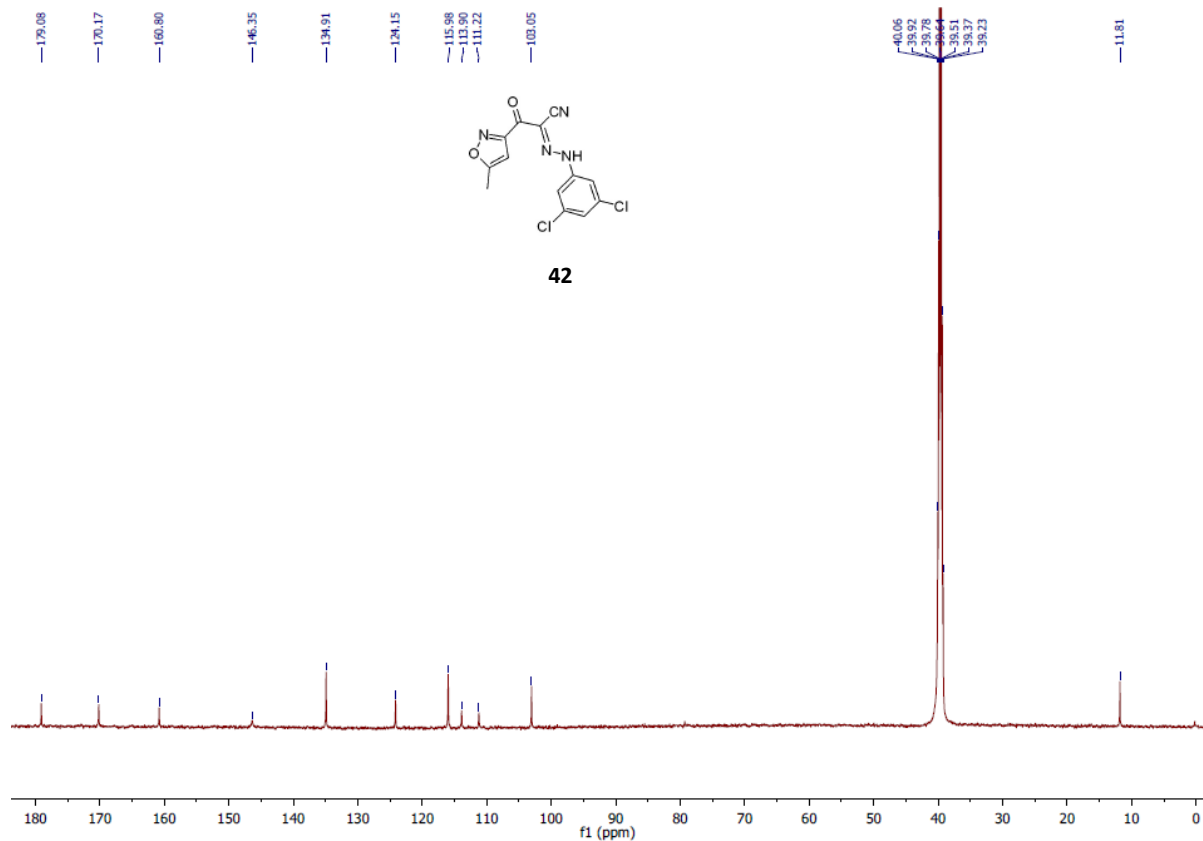



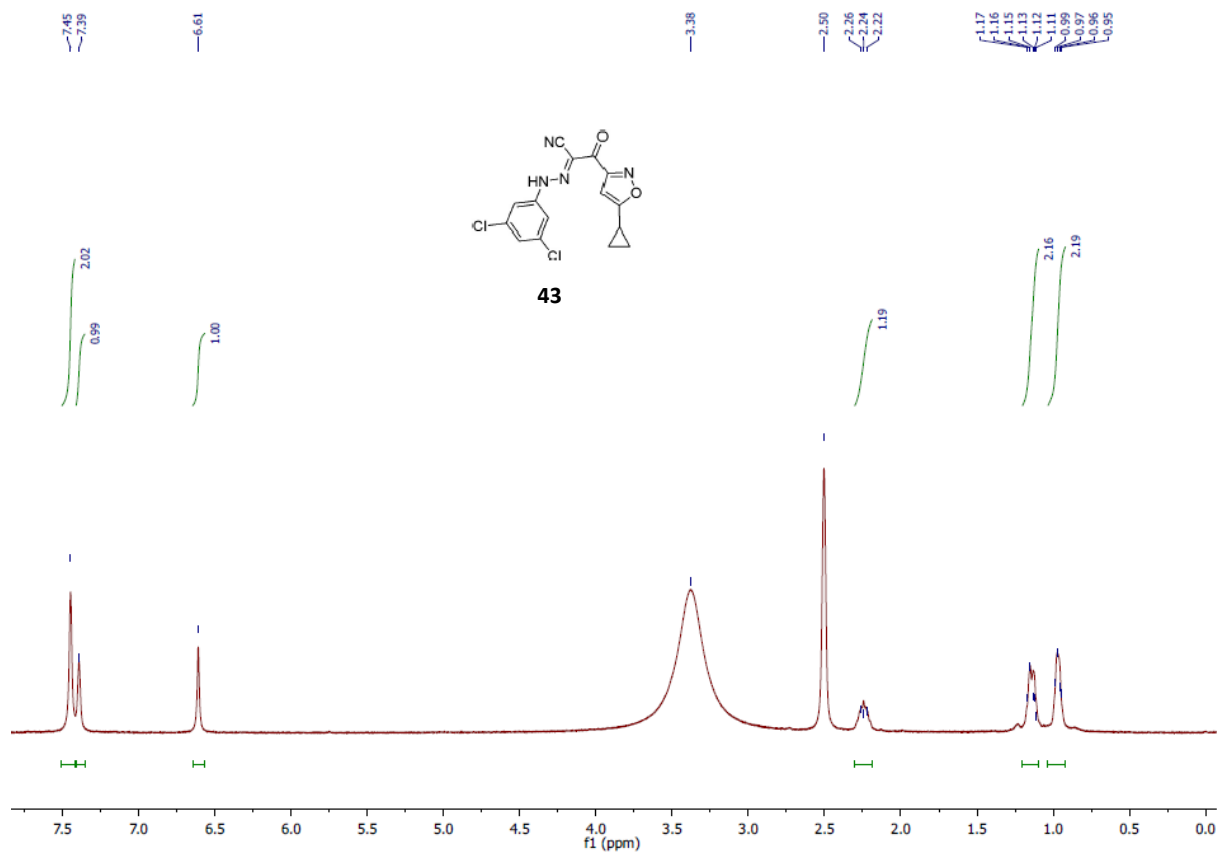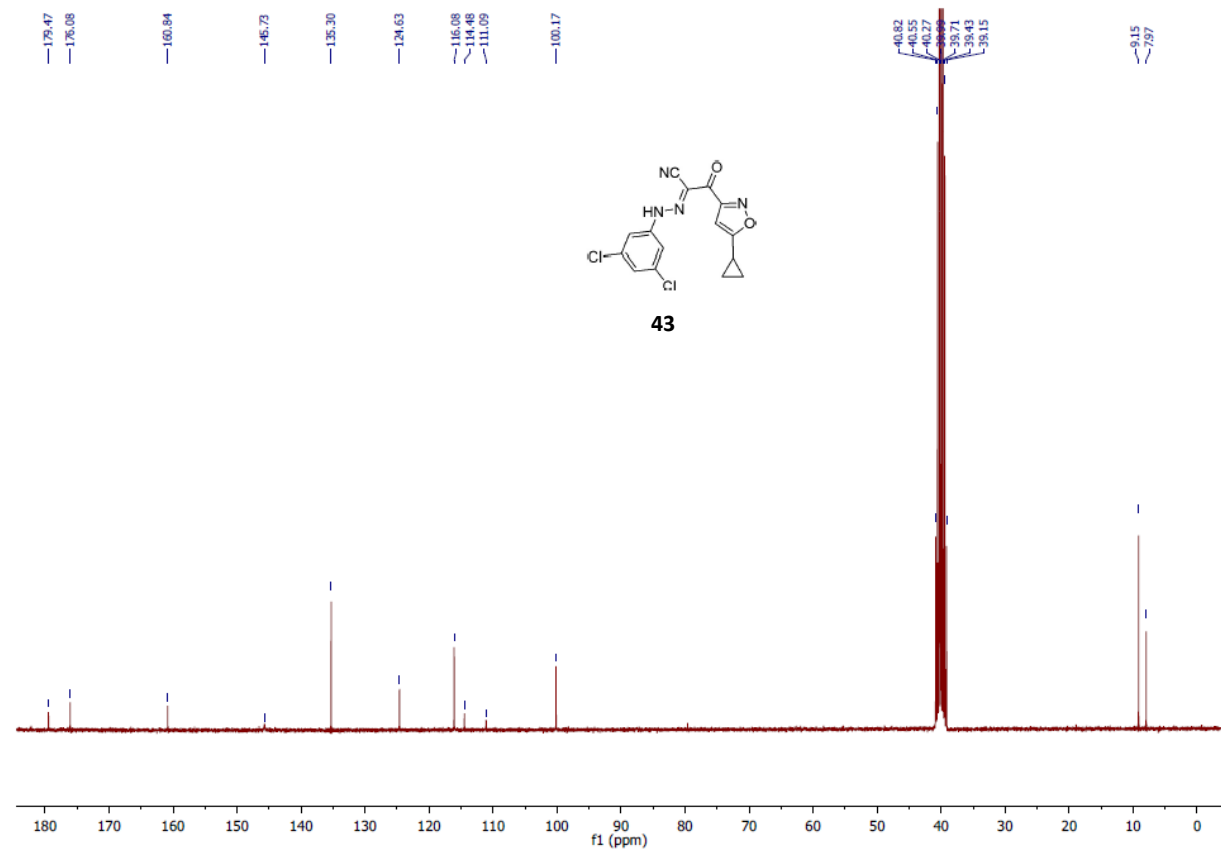

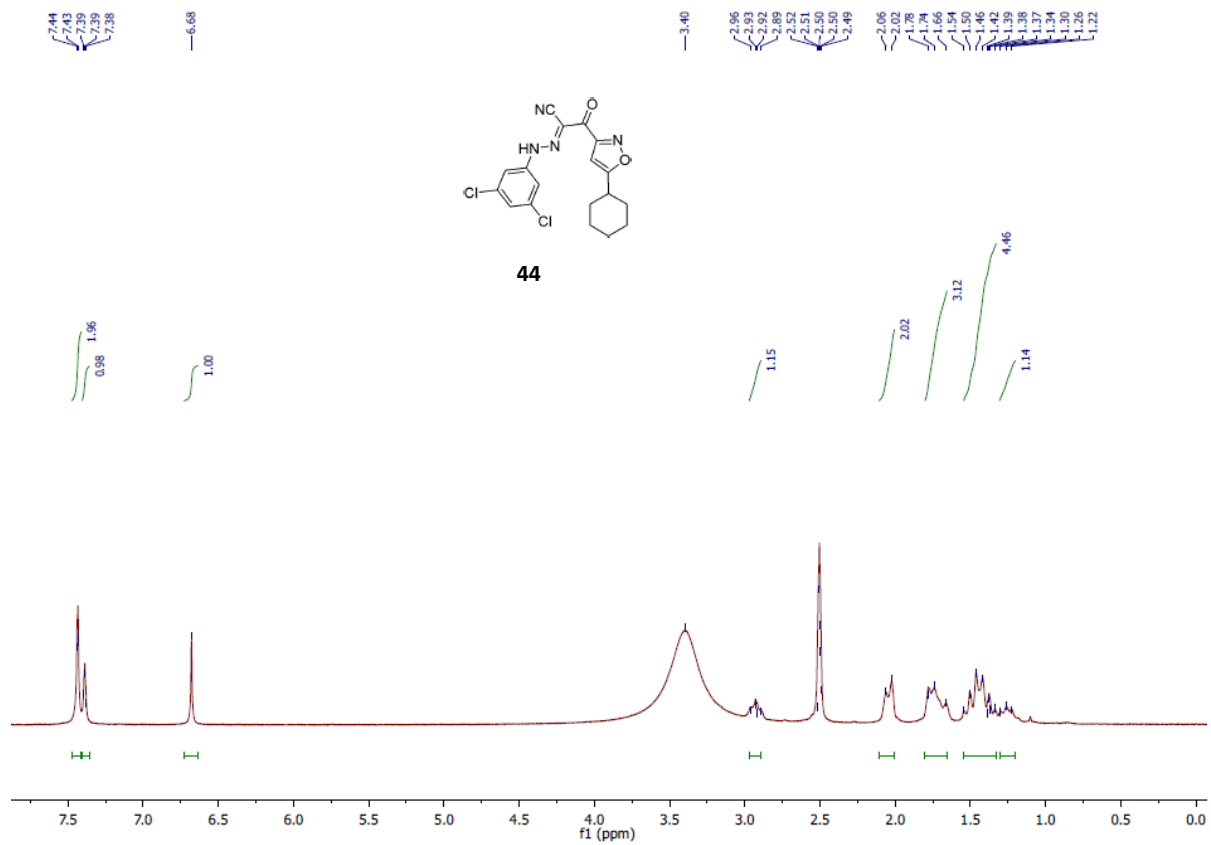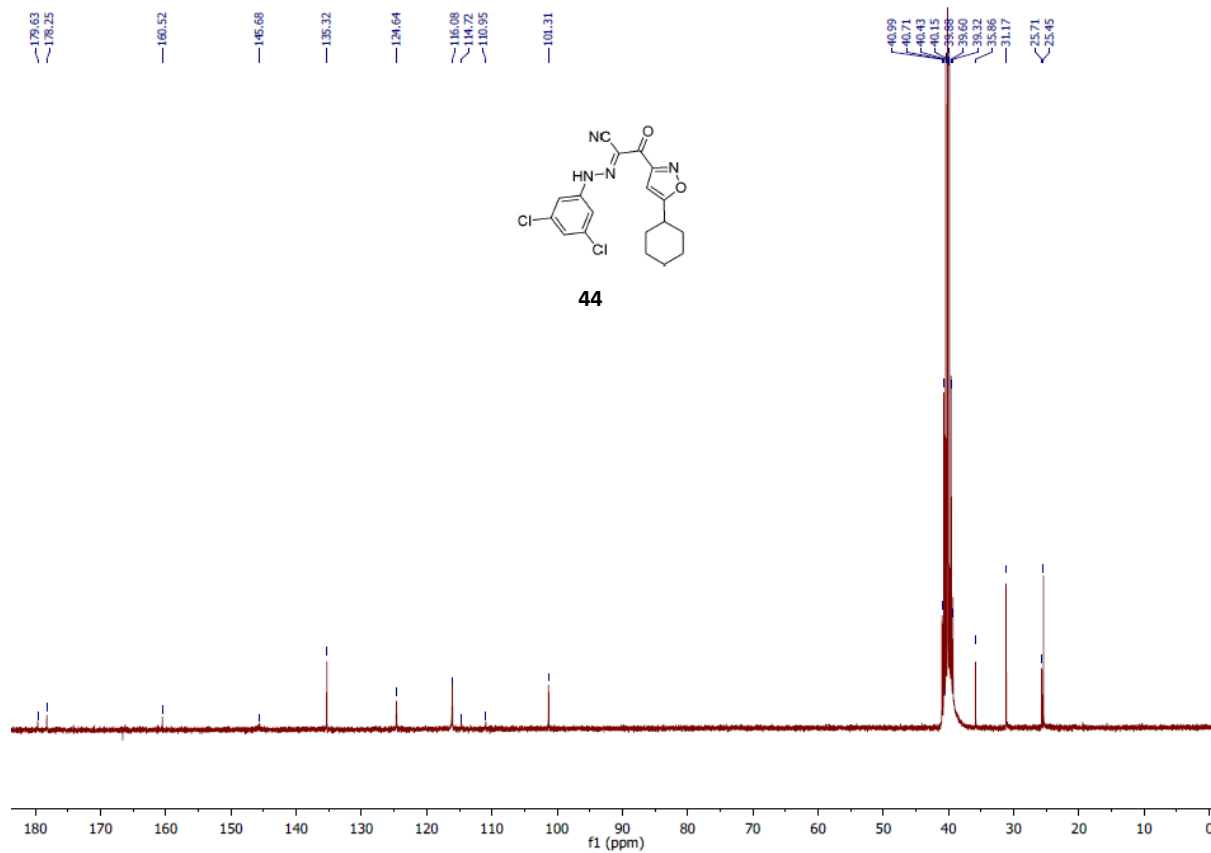

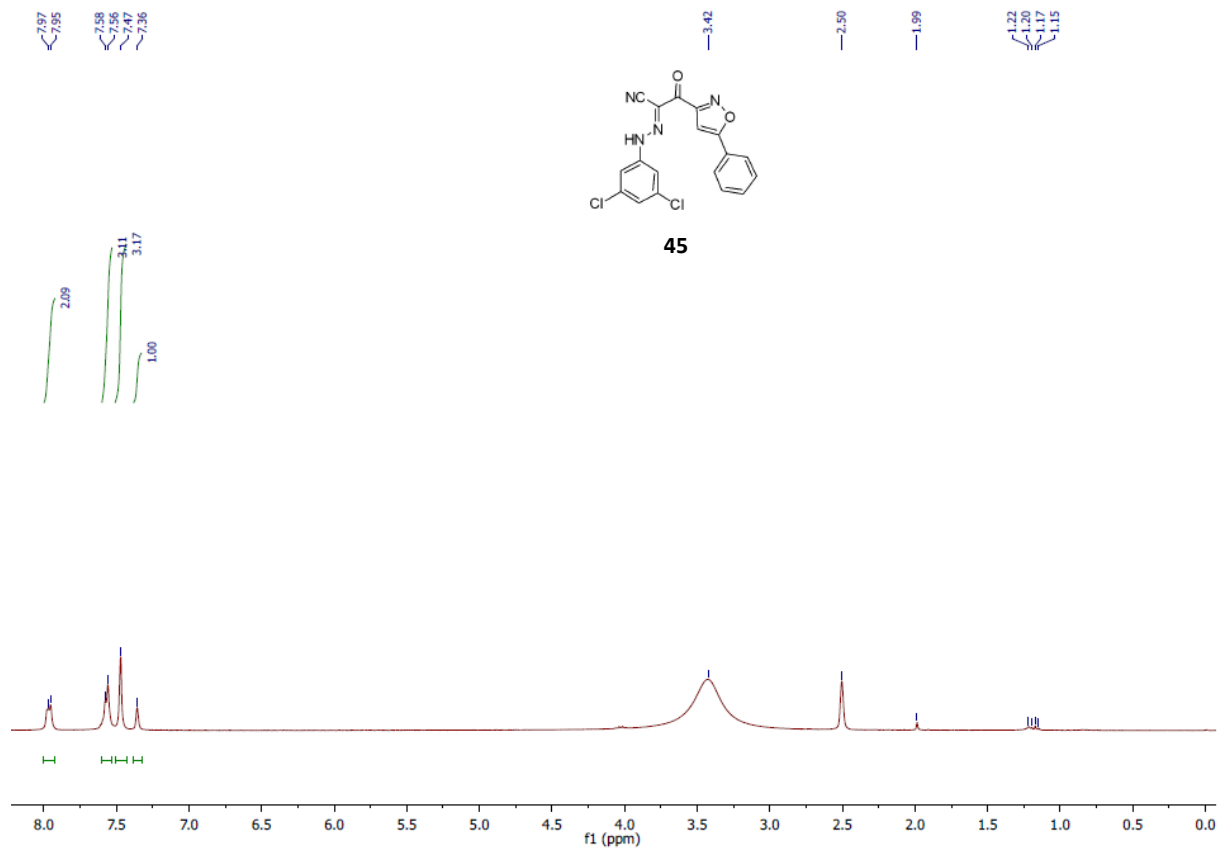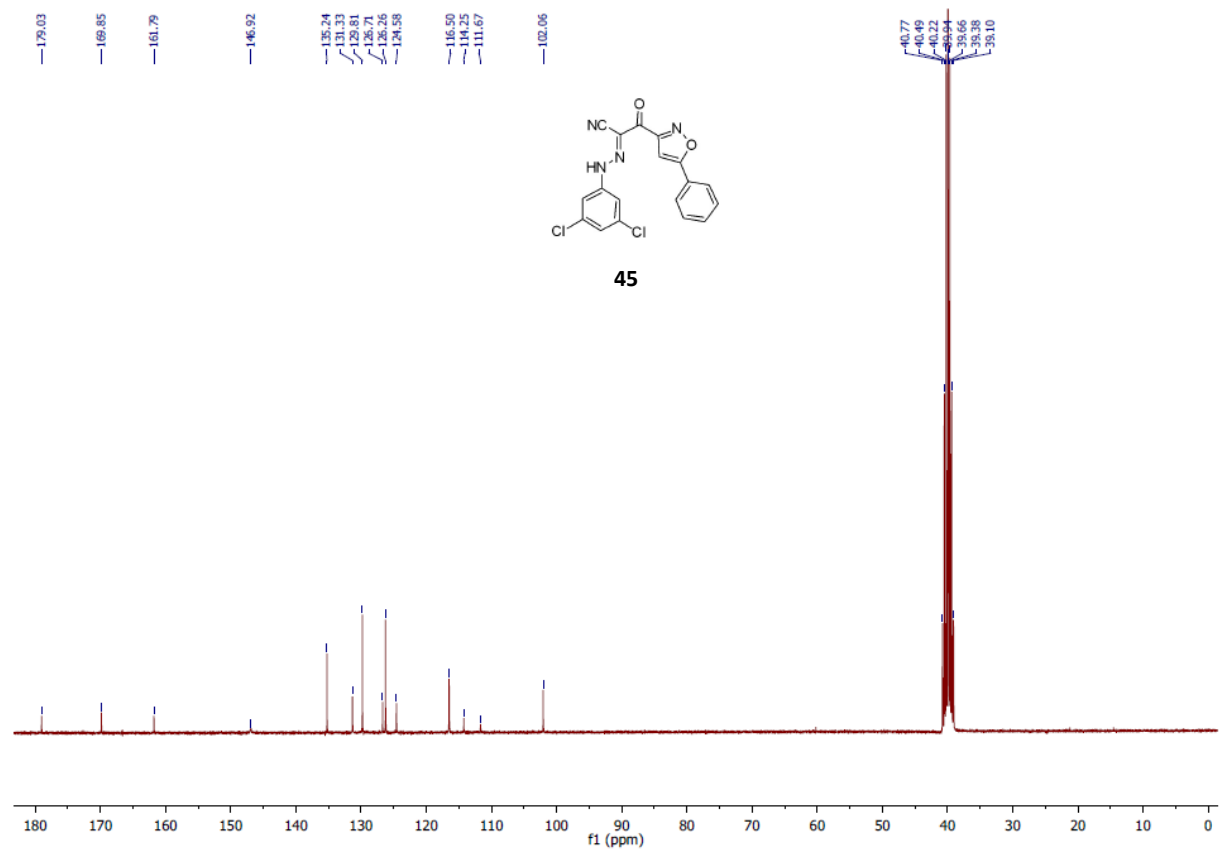

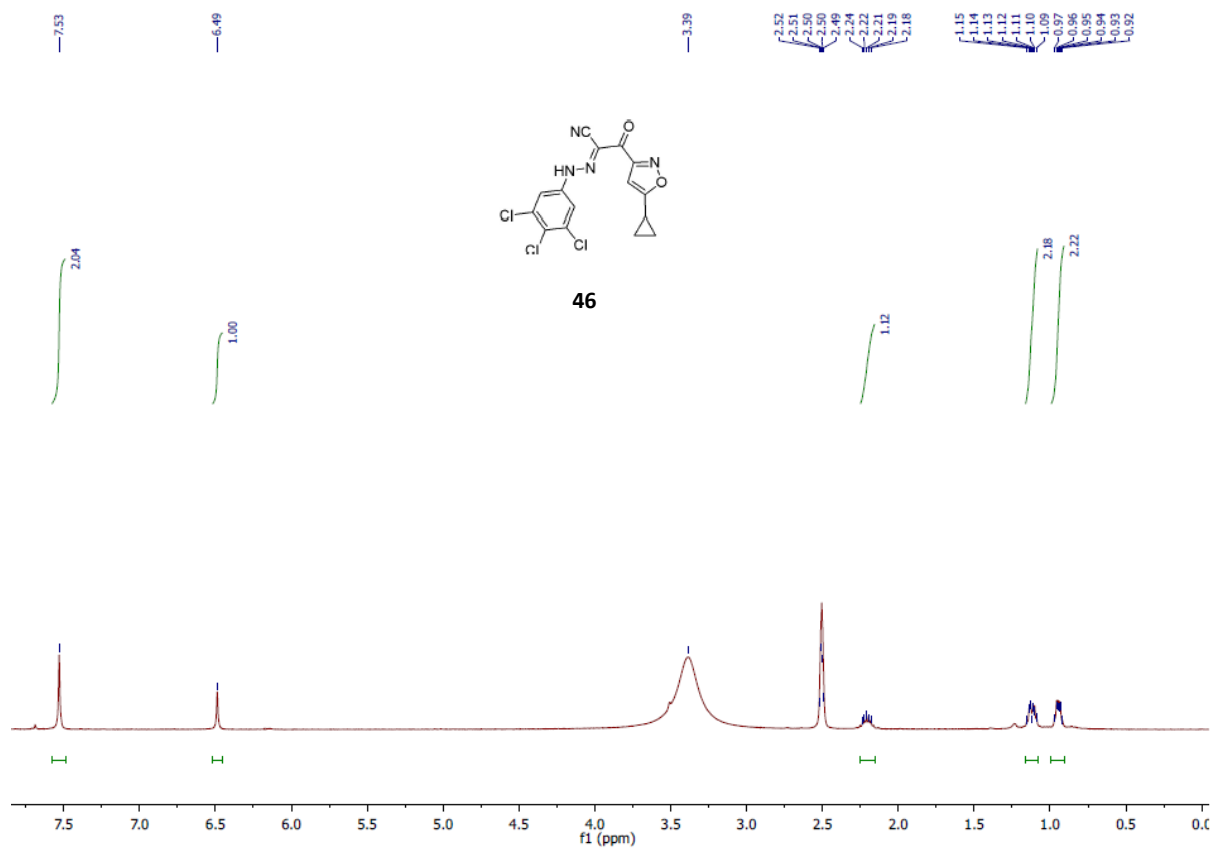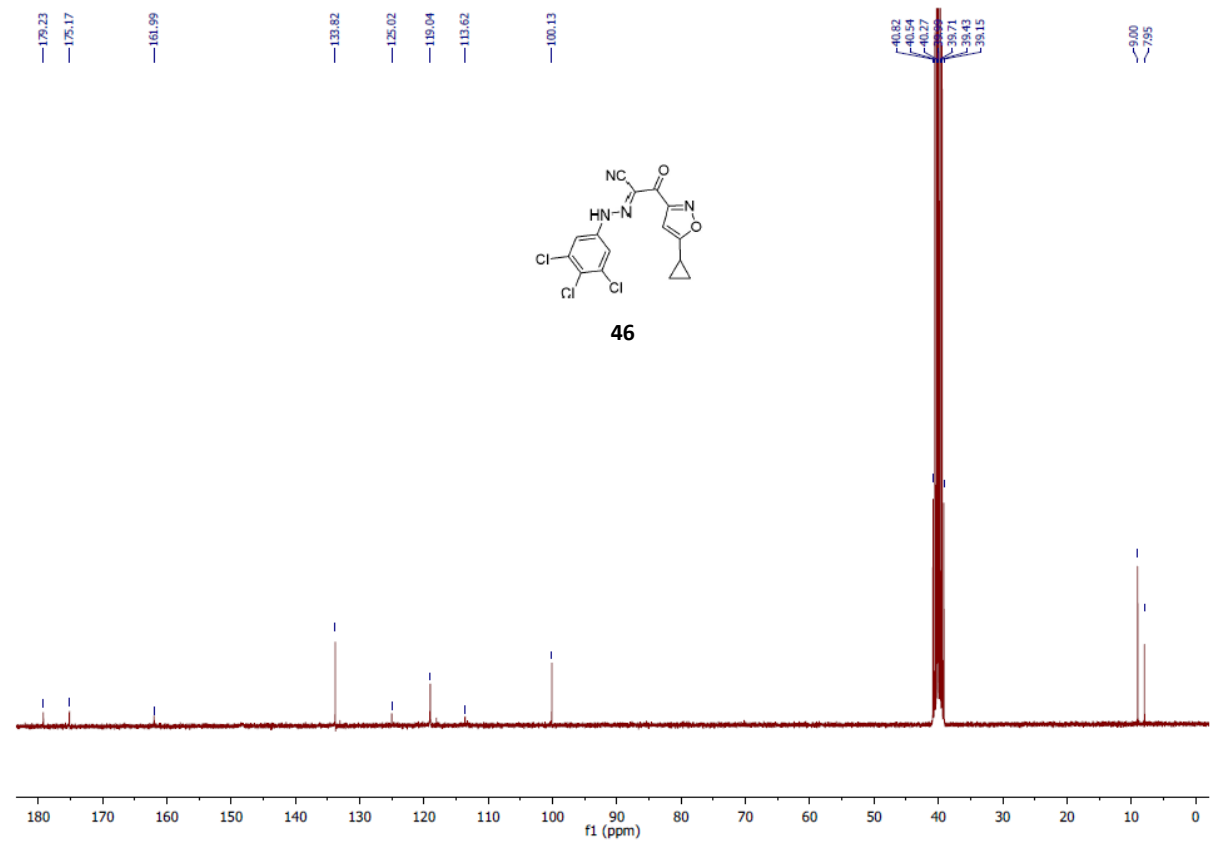

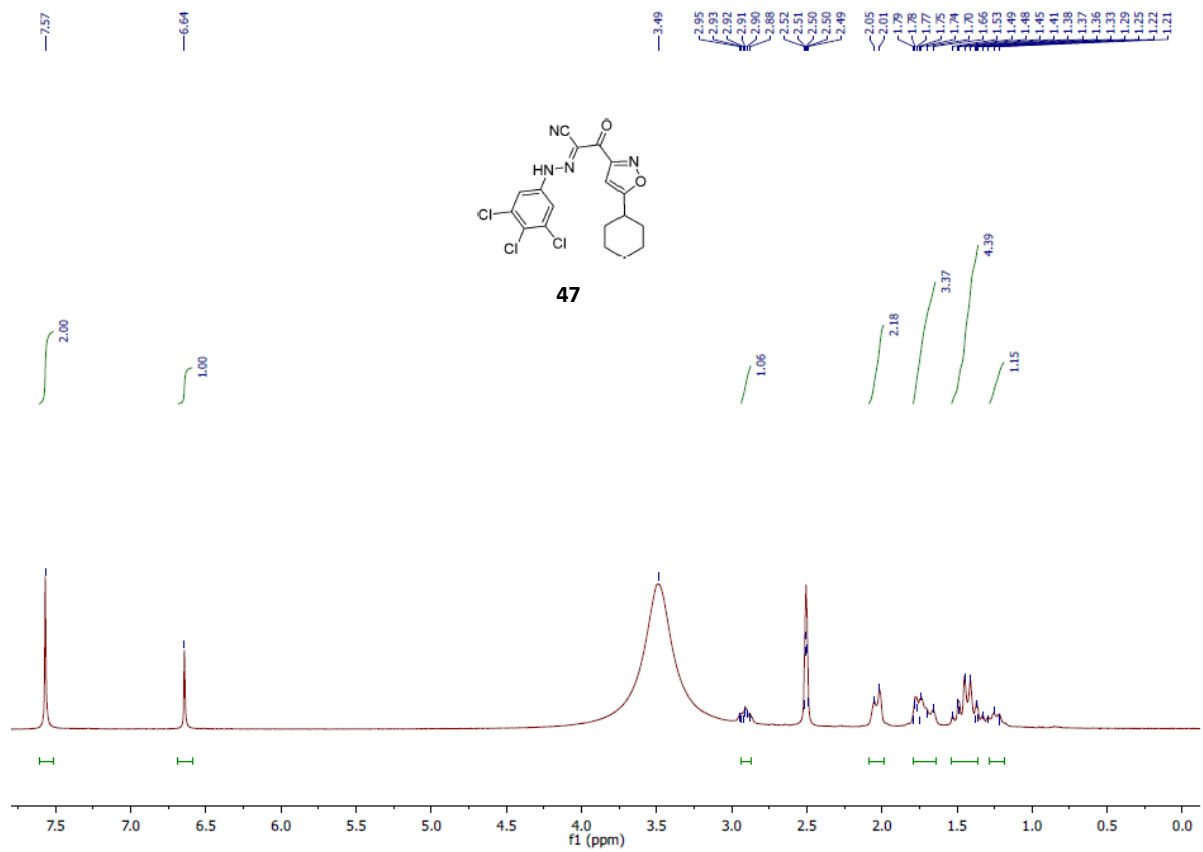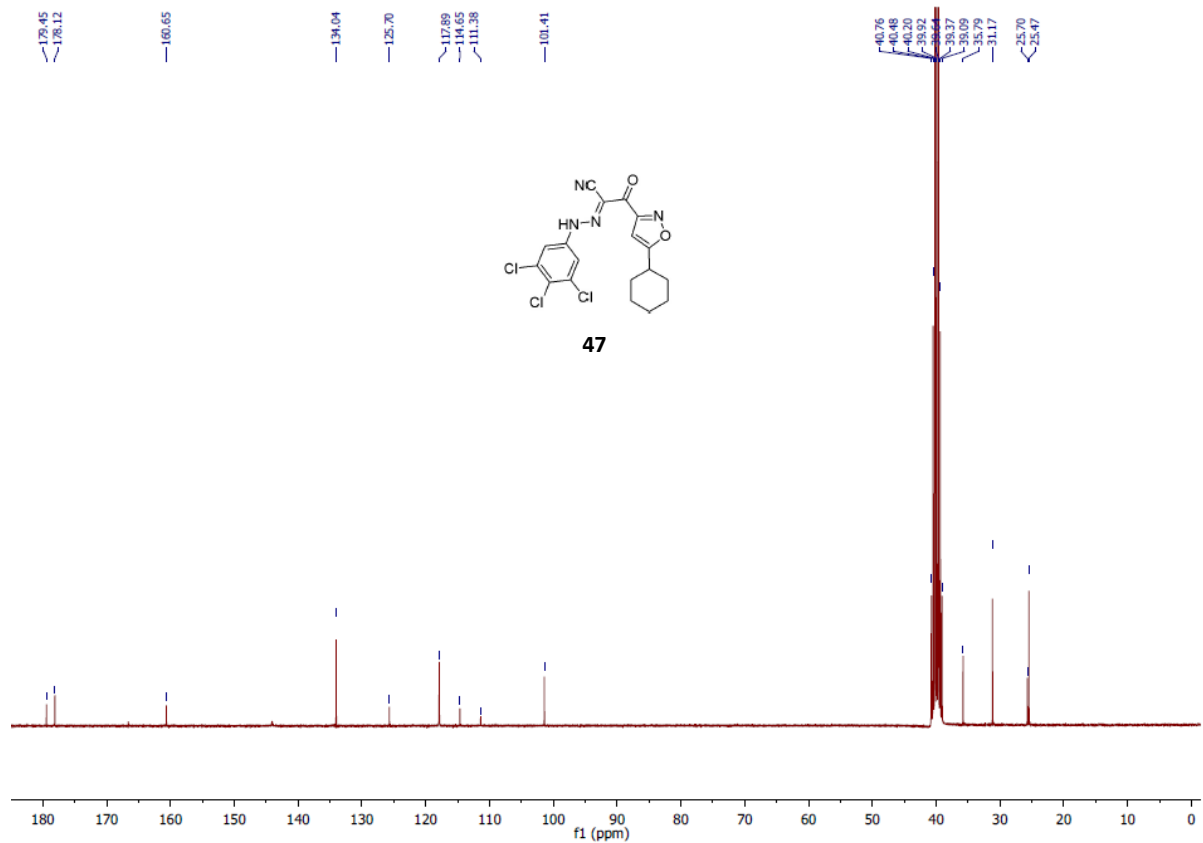

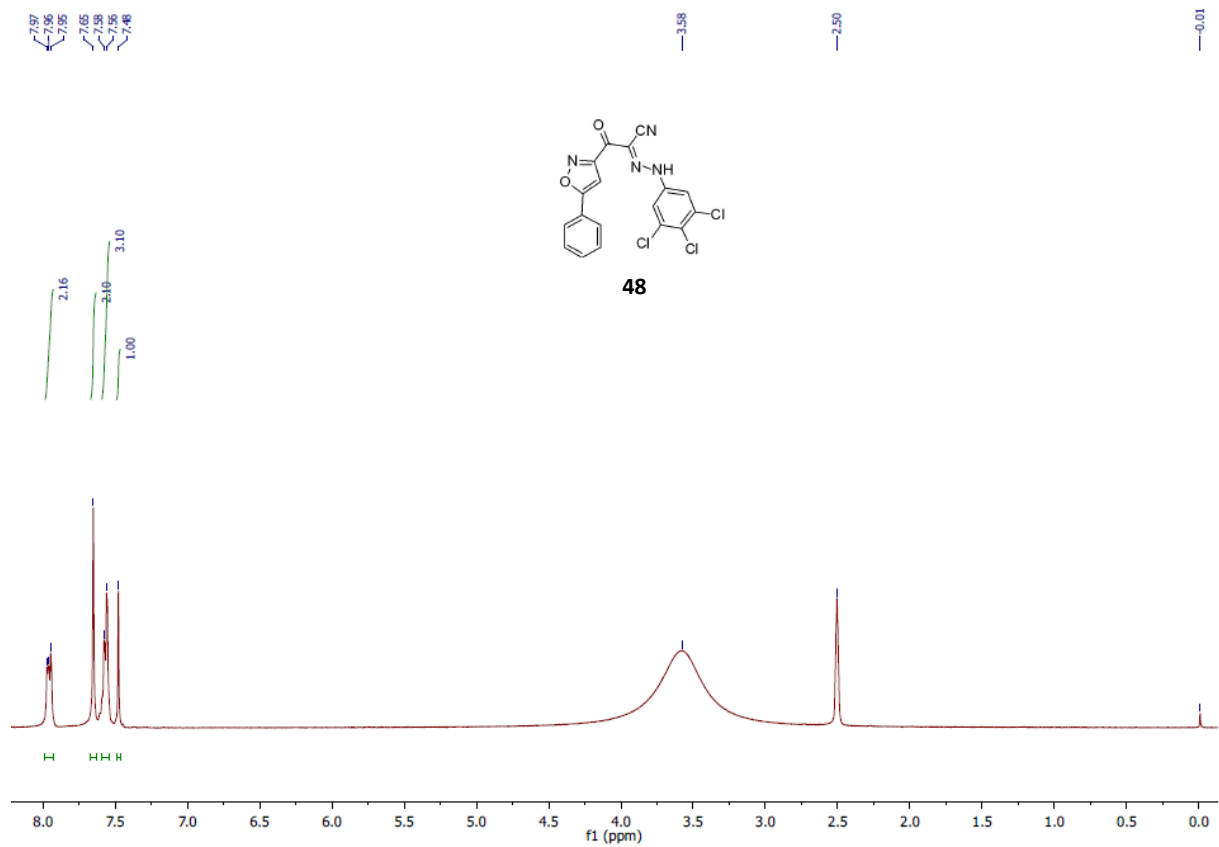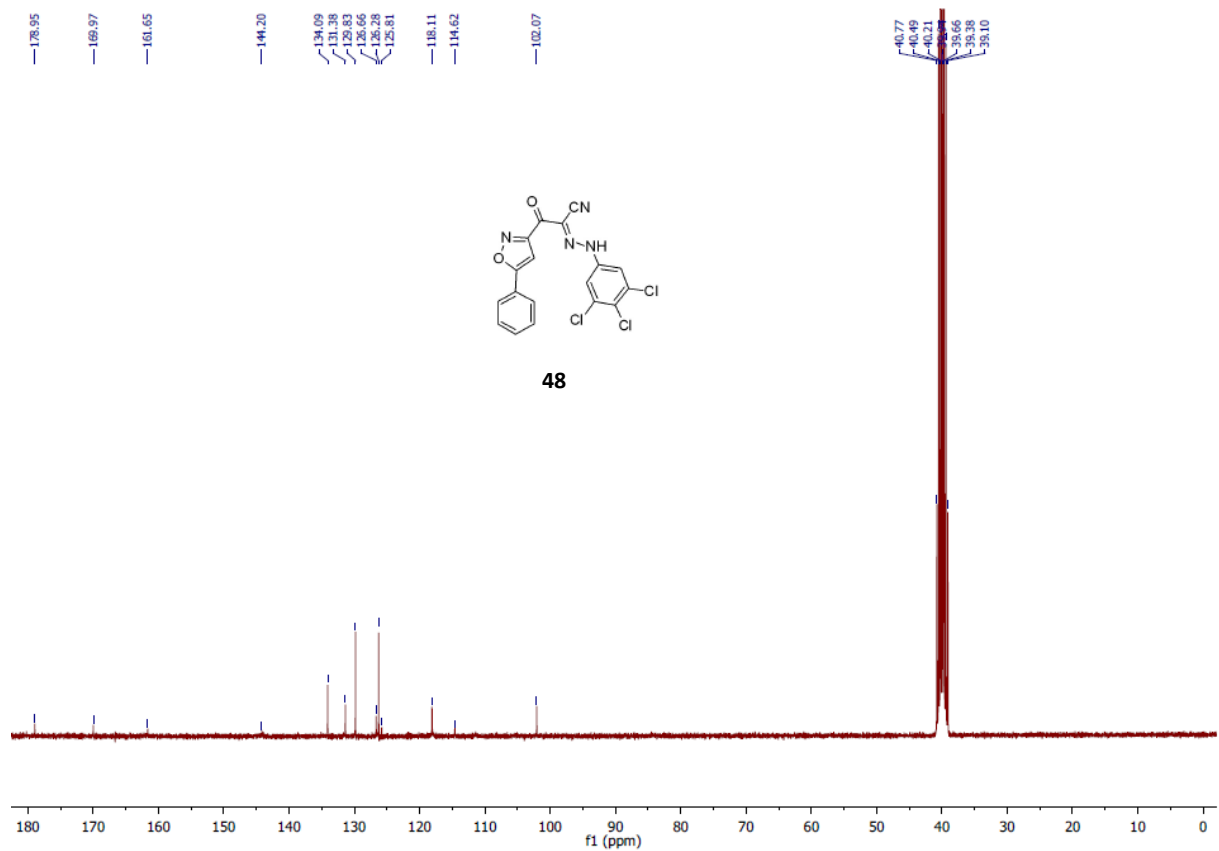

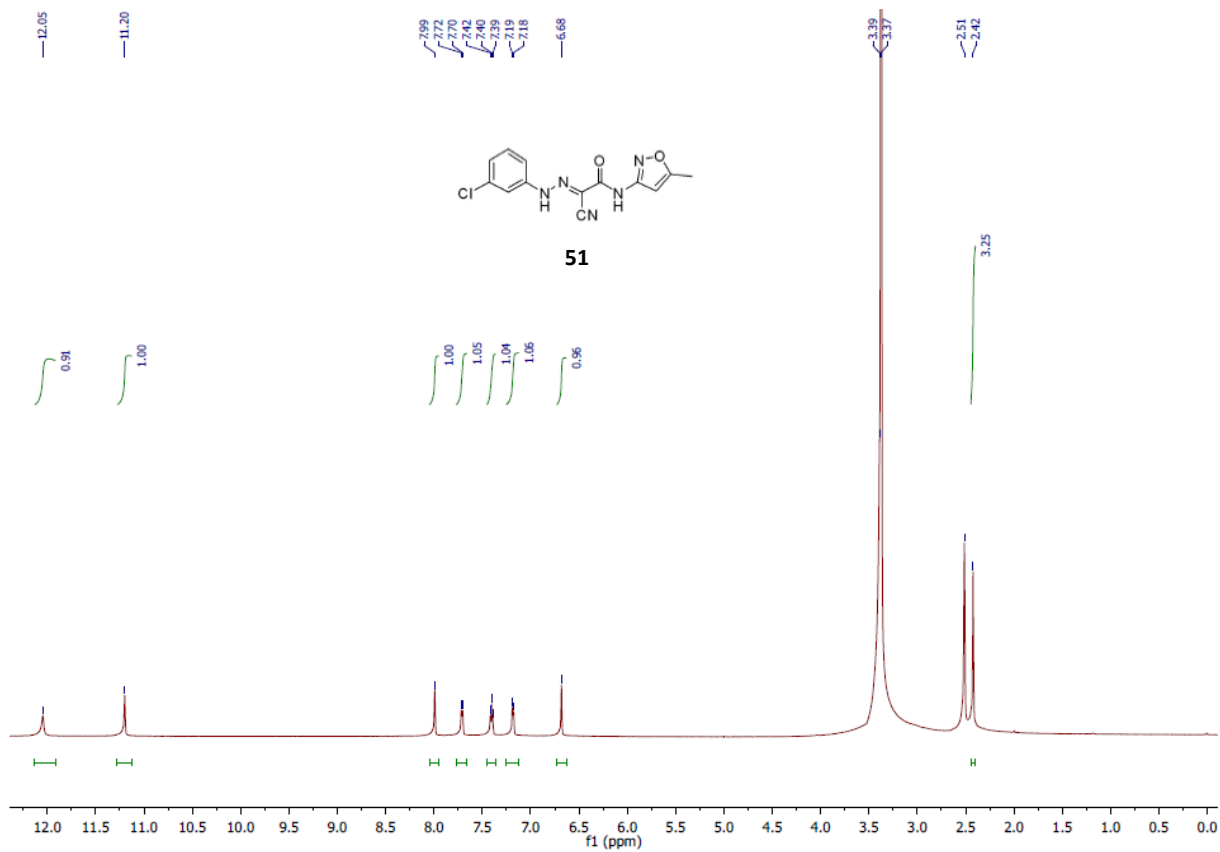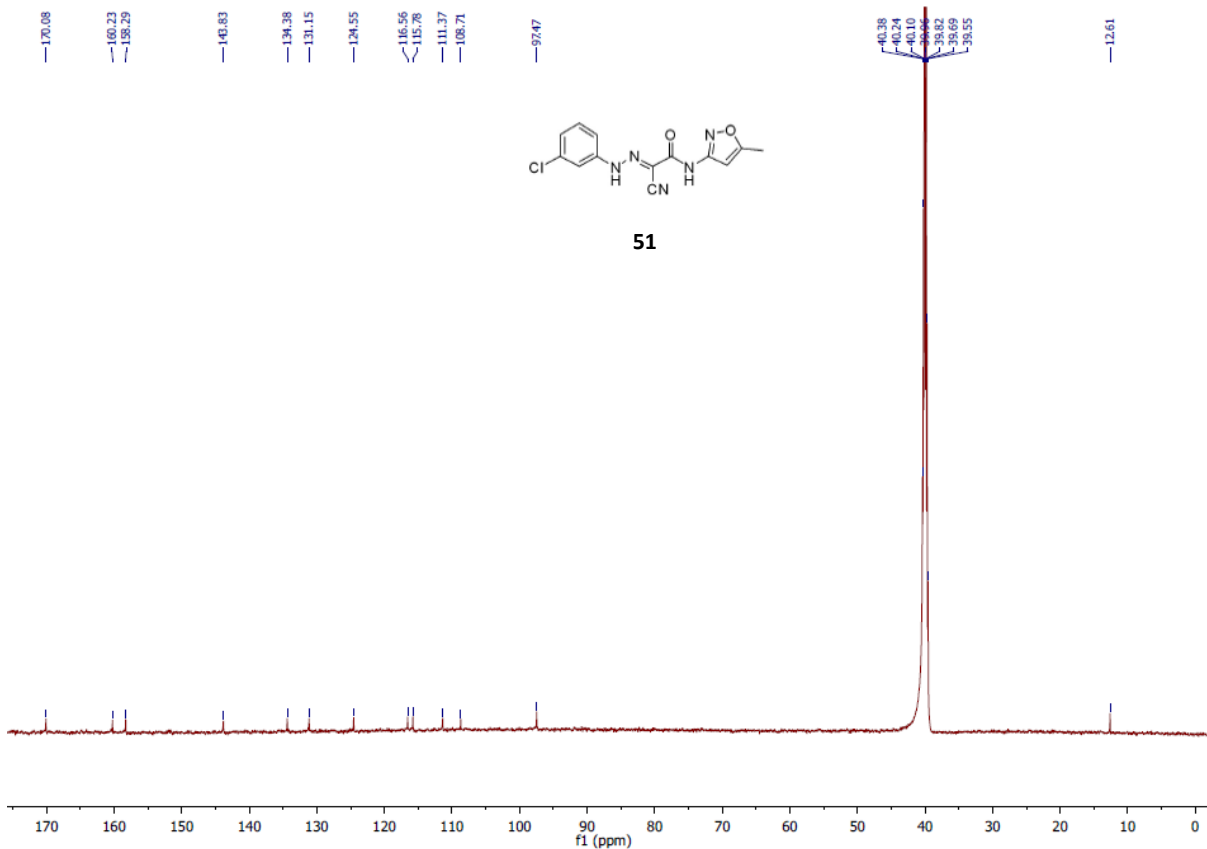

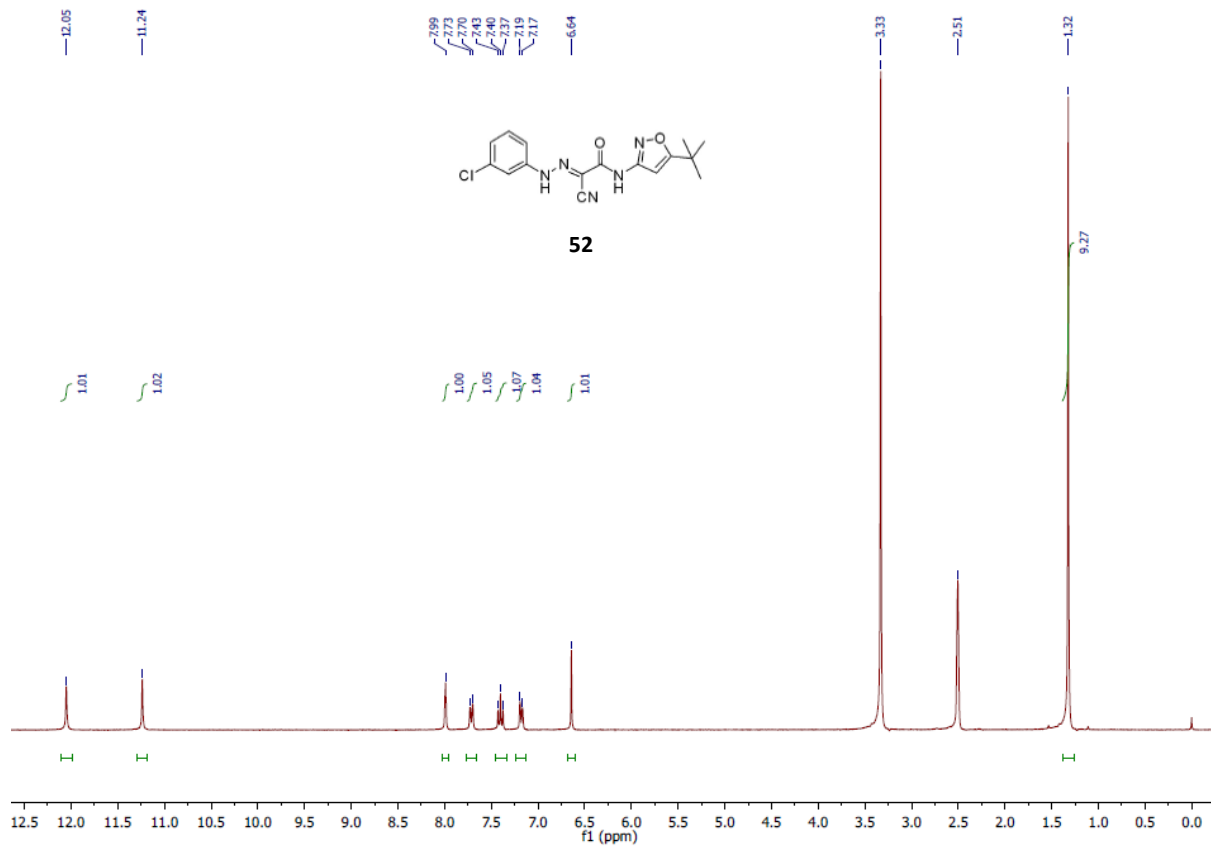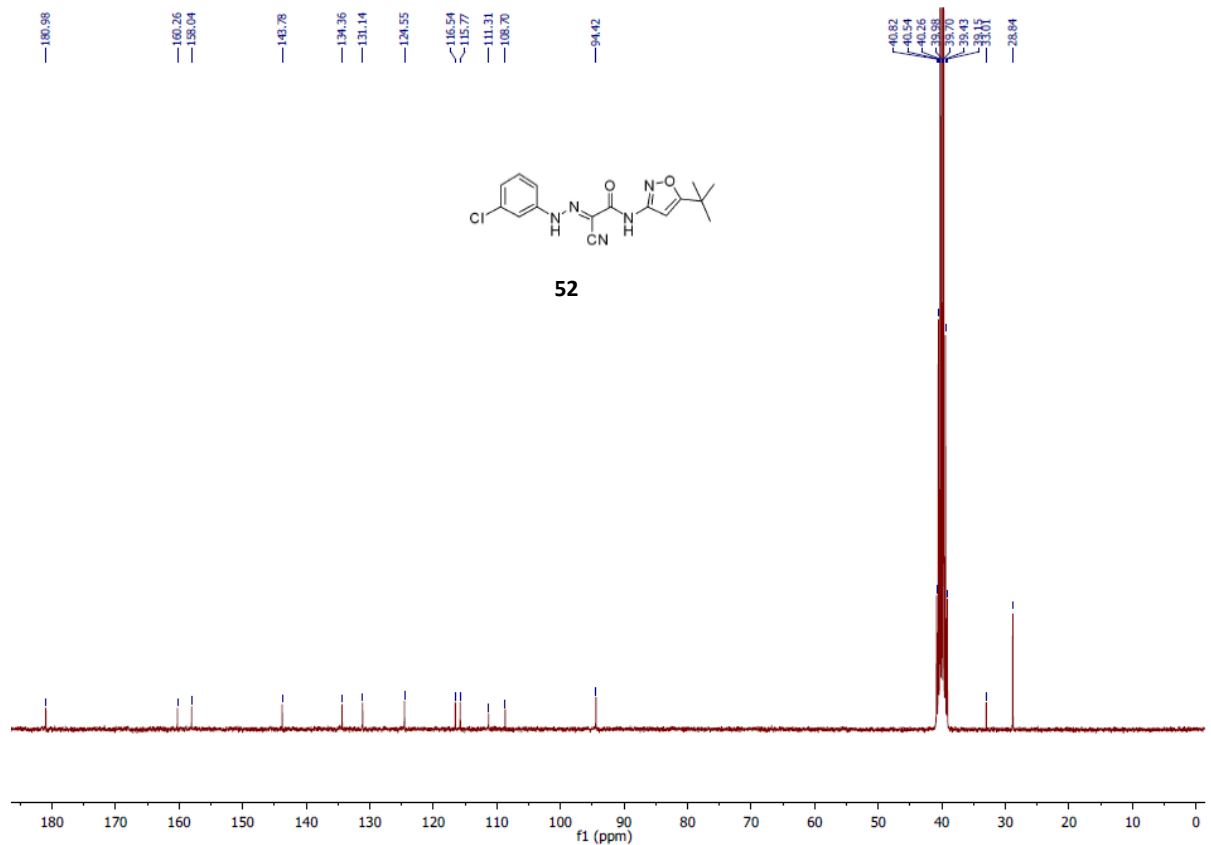



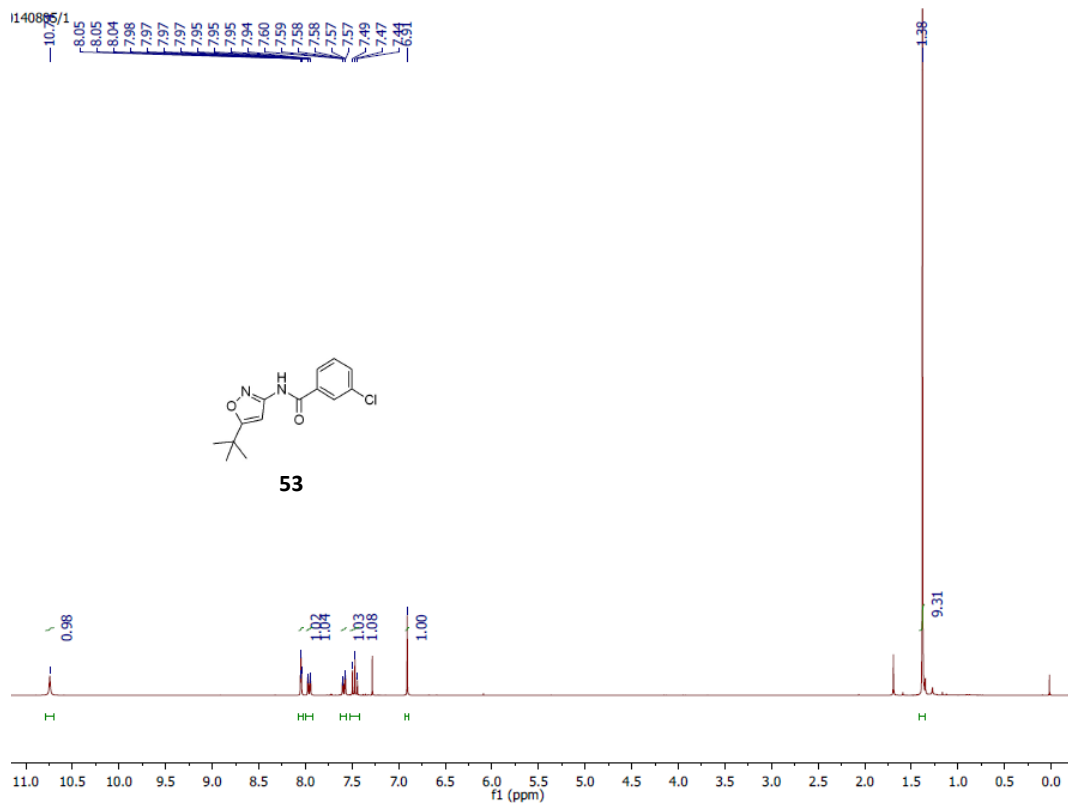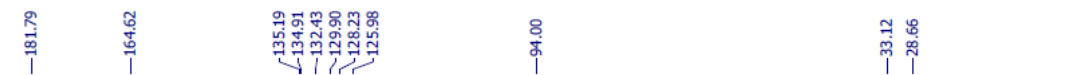

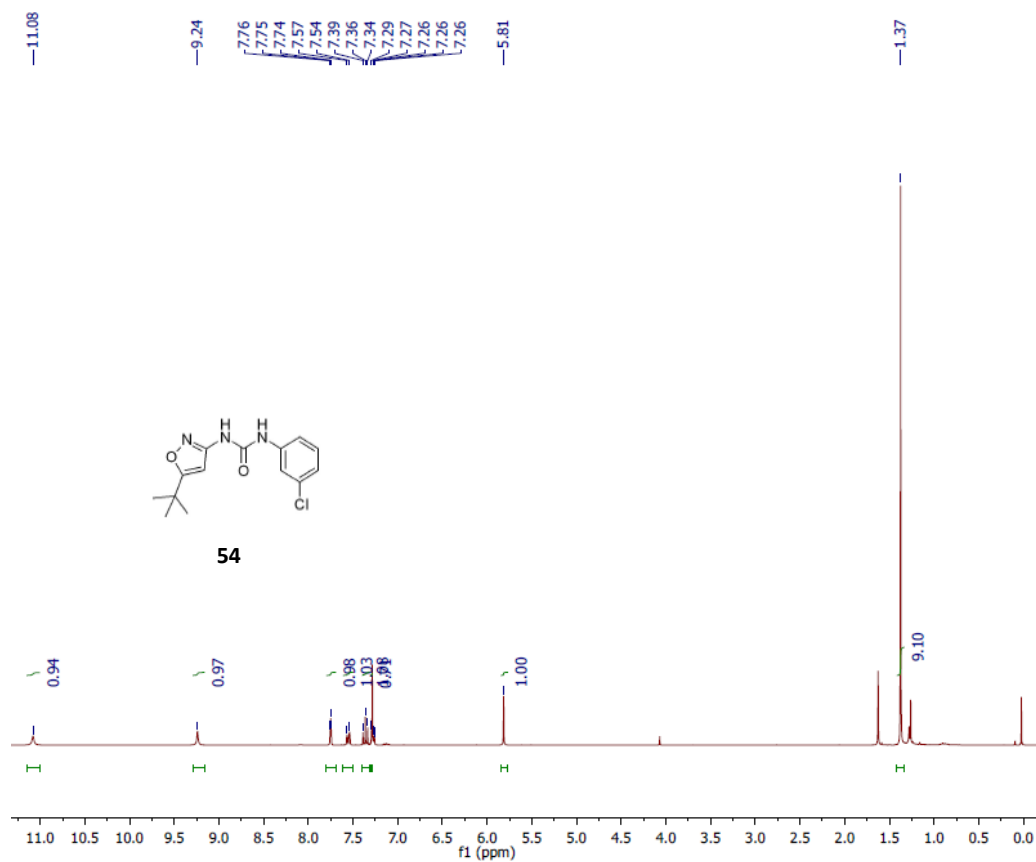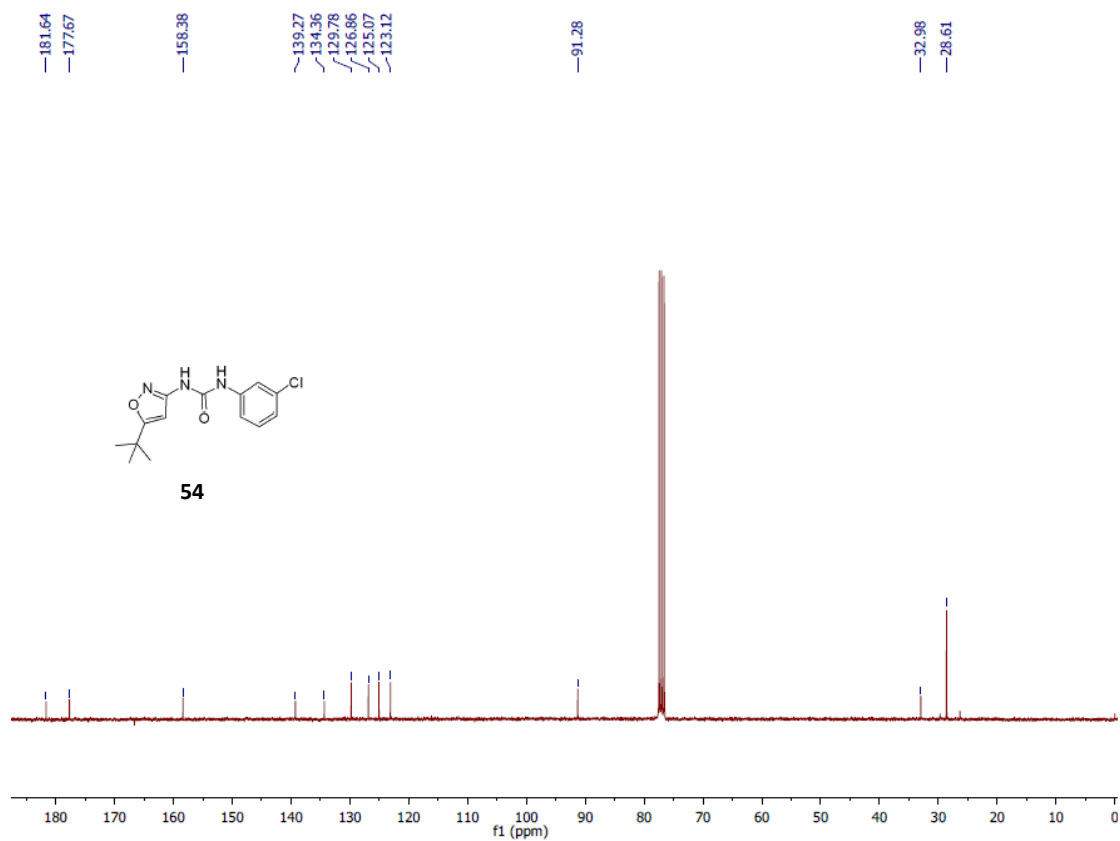

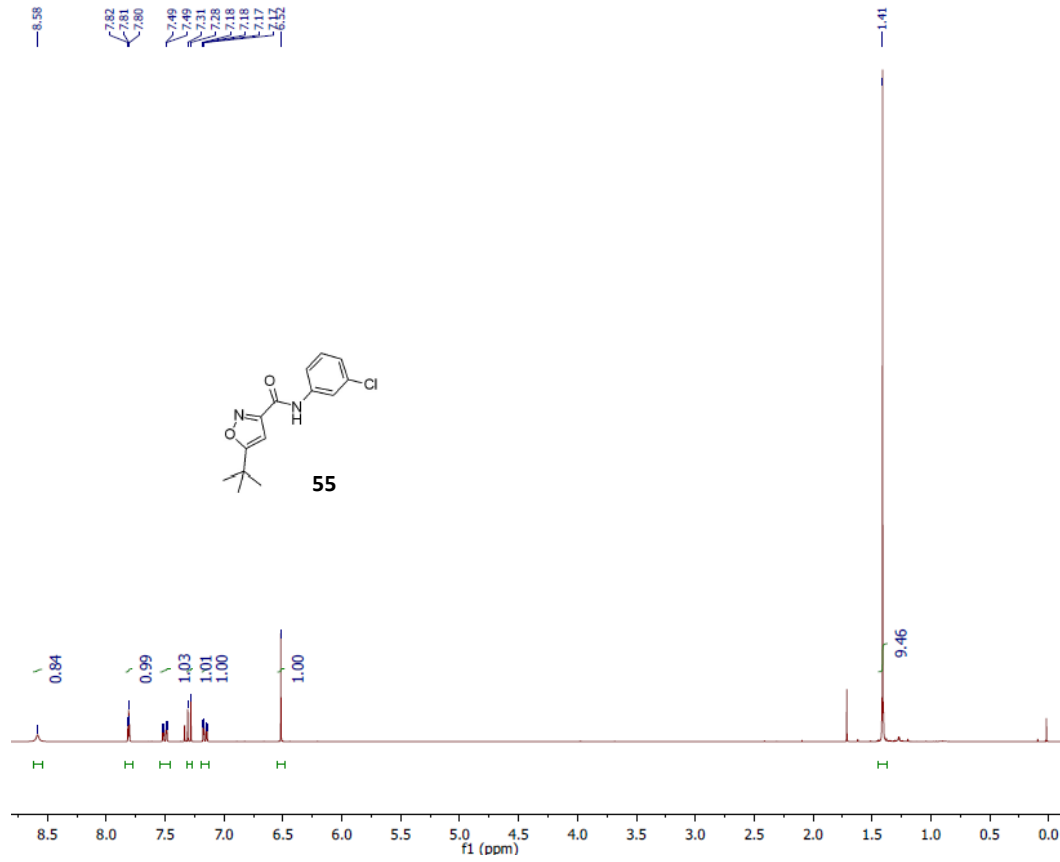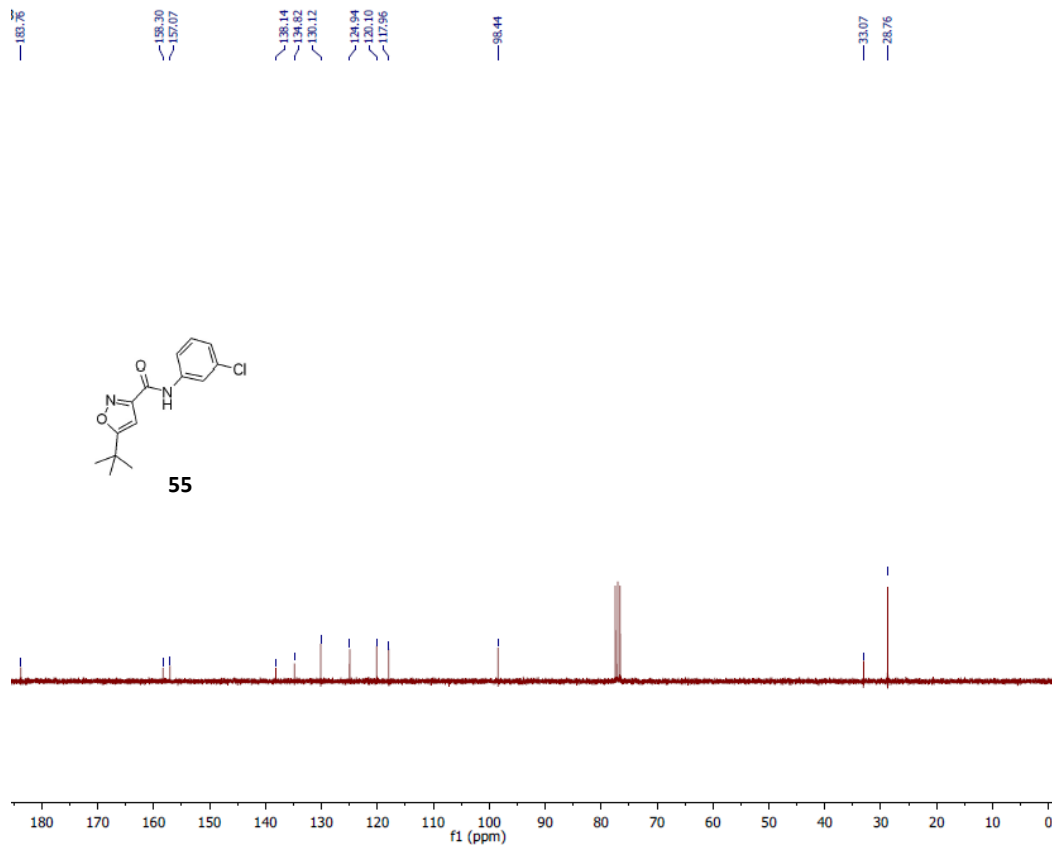

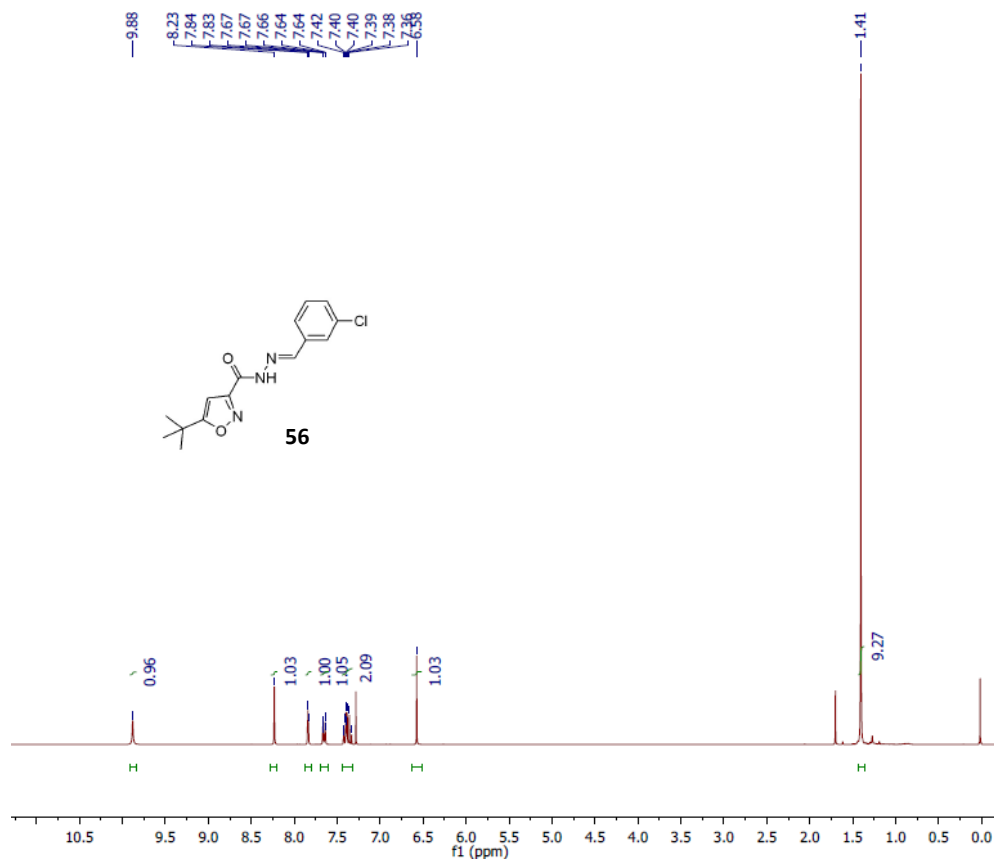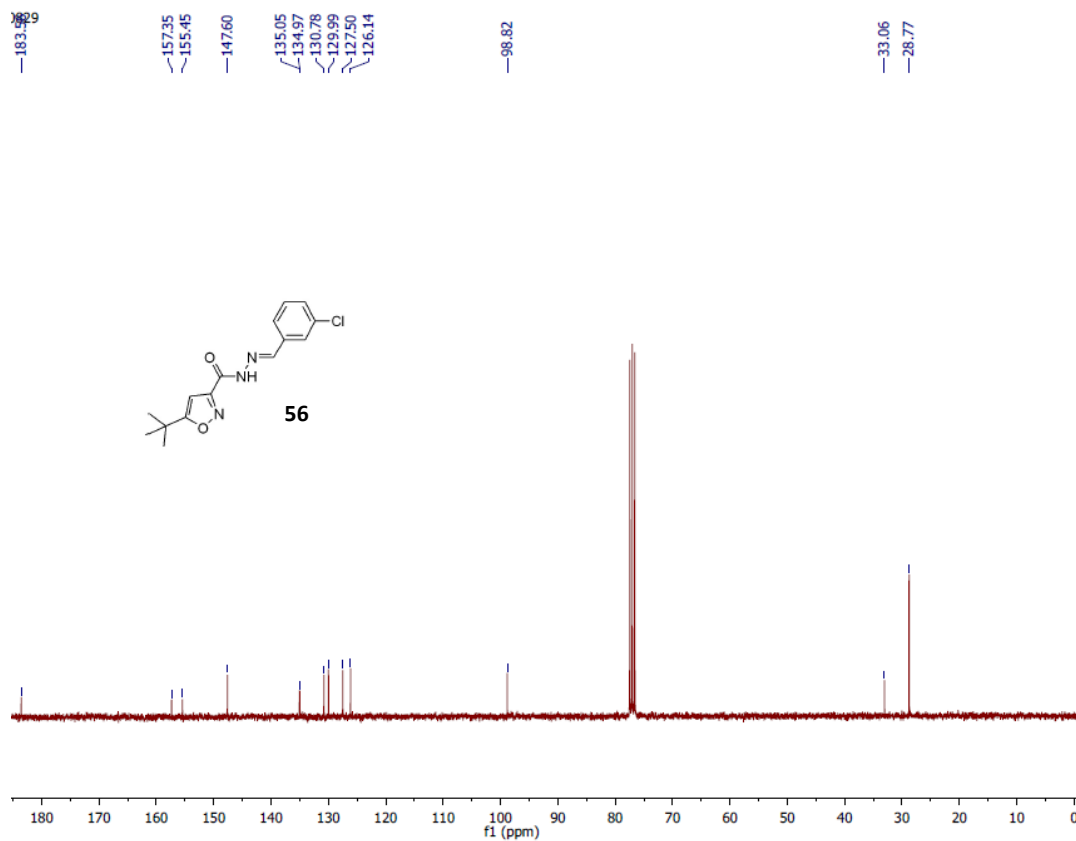

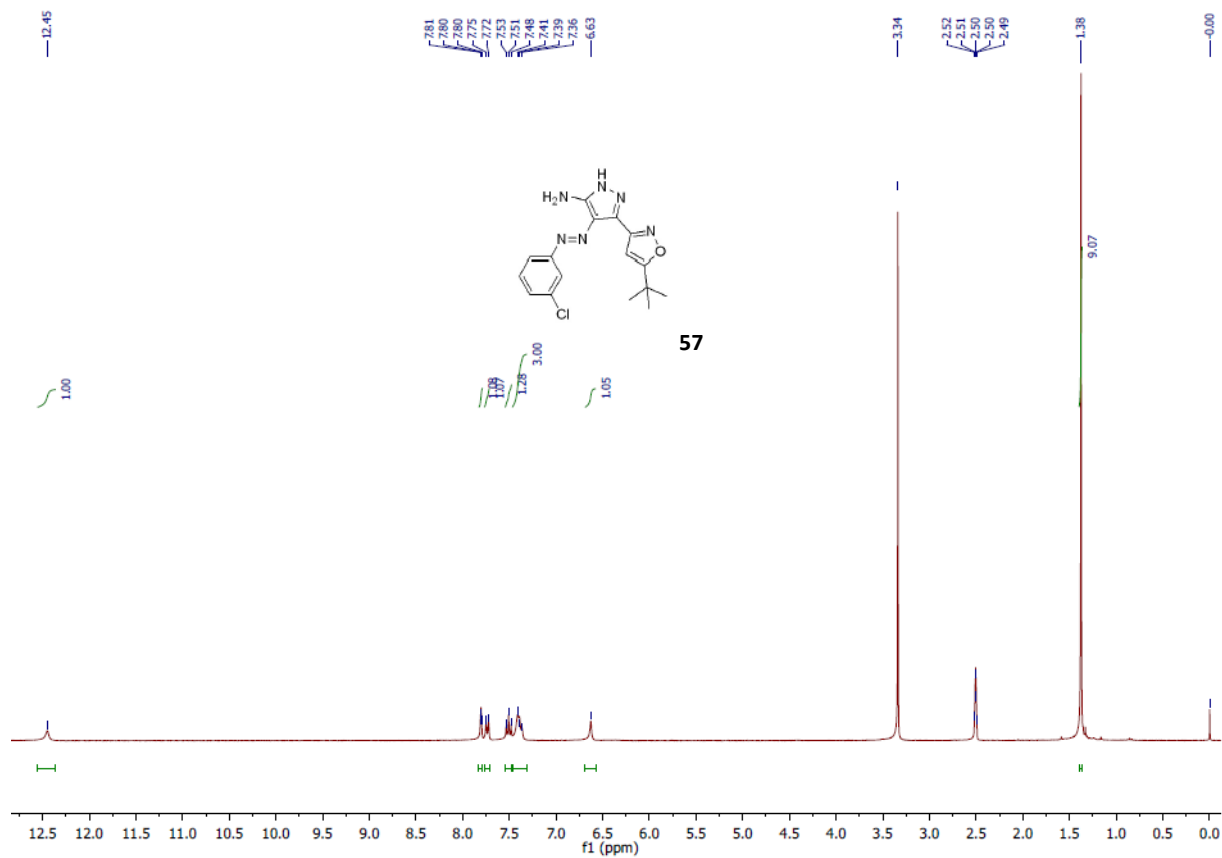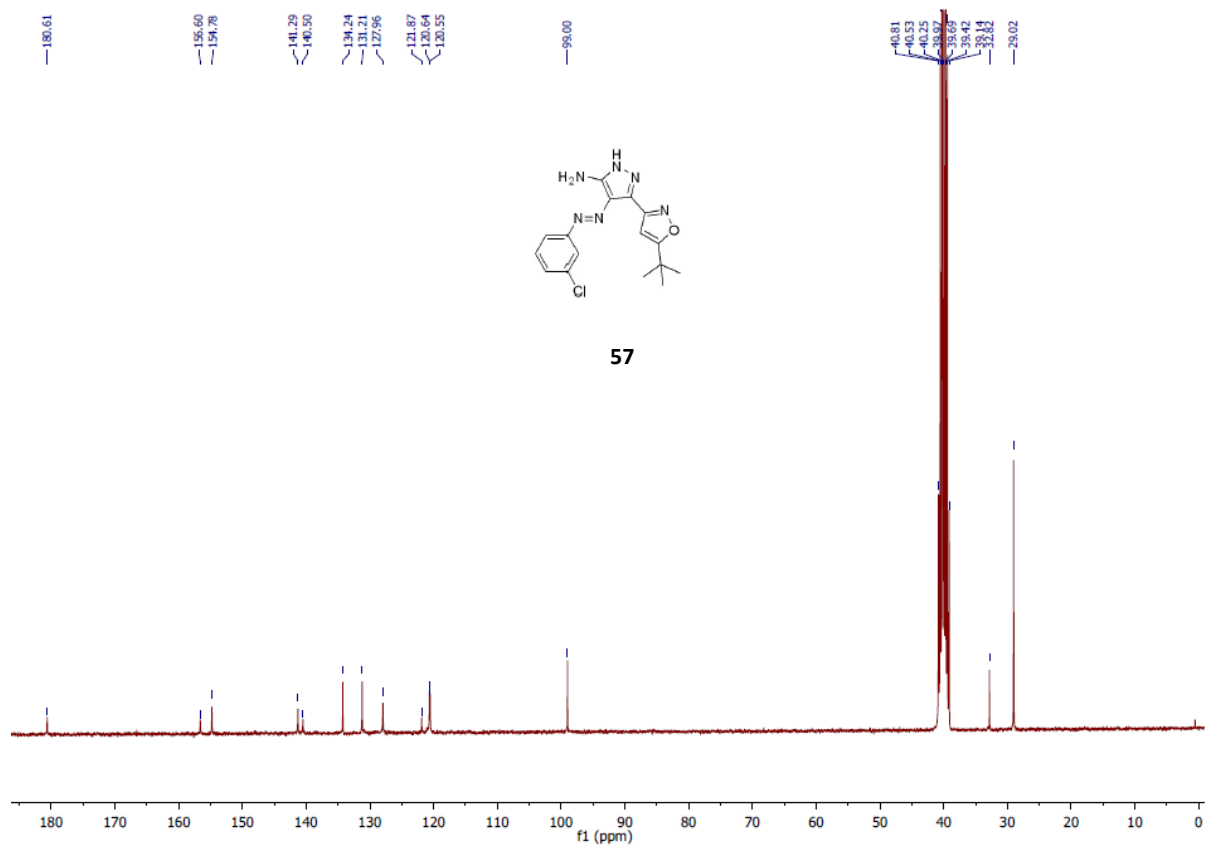

Supplement: NIHMS759247-supplement-SI.pdf [file NIHMS759247-supplement-SI.pdf]
